# Supplementary material for: Growth Simulation and Discrimination of Botrytis cinerea, Rhizopus stolonifer and Colletotrichum acutatum Using Hyperspectral Reflectance Imaging
Source: PLoS One. 2015 Dec 7;10(12):e0143400. doi: 10.1371/journal.pone.0143400 (PMC4671615; doi:10.1371/journal.pone.0143400)
Supplement: S1 Dataset — (XLSX) [file pone.0143400.s002.xlsx]

## Sheet: 0h
band	1	2	3	4	5	6	7	8	9	10	11	12	13	14	15	16	17	18	19	20	21	22	23	24	25	26	27	28	29	30
band1	624.064	629.975	566.206	662.003	643.477	613.23	587.71	590.295	595.846	645.438	554.192	555.396	501.35	516.231	580.749	520.655	546.201	542.227	593.156	559.389	550.455	585.105	593.065	598.596	572.363	593.343	615.772	612.612	587.389	598.889
band2	600.141	579.263	590.119	647.144	695.026	610.823	617.413	601.027	564.862	606.061	515.133	568.911	515.559	488.11	555.167	419.436	500.22	549.943	543.228	558.061	529.844	505.729	664.875	584.27	583.623	593.159	604.414	623.893	634.42	496.364
band3	568.109	539.575	599.484	627.879	610.012	590.494	623.143	582.115	510.892	661.881	521.316	545.226	435.846	515.792	552.418	535.588	511.896	543.116	556.588	479.276	488.478	507.423	576.398	562.67	521.942	550.391	573.058	622.591	567.747	564.421
band4	553.141	581.991	575.897	578.89	562.101	586.391	615.095	575.524	536.326	605.433	500.718	533.63	463.228	516.552	525.698	550.224	481.438	531.979	495.405	539.85	511.304	533.201	592.91	560.447	519.496	537.404	578.823	585.873	562.162	555.255
band5	526.543	614.081	499.587	592.451	529.591	578.785	556.858	533.404	532.876	597.506	506.944	473.365	481.037	491.873	601.379	534.182	522.088	500.623	527.63	457.614	518.675	539.822	553.95	519.479	520.589	556.333	523.087	555.094	539.838	535.387
band6	558.238	548.841	526.658	554.895	566.625	538.08	468.422	524.366	605.057	542.185	463.87	503.4	423.709	529.074	468.534	545.188	527.589	491.672	484.905	494.846	492.069	534.132	500.527	488.697	472.927	496.545	528.408	511.88	499.853	535.437
band7	524.594	527.878	502.655	486.595	496.984	493.386	490.803	472.79	539.621	507.38	493.87	458.216	412.761	453.054	494.196	414.224	501.161	461.067	443.207	461.884	455.247	461.608	487.11	473.587	438.444	472.966	495.638	512.594	467.166	502.905
band8	470.097	509.762	489.803	483.654	488.999	459.503	456.69	478.38	505.729	481.433	454.539	467.288	408.665	452.419	509.129	473.182	464.778	464.308	502.991	512.867	443.014	460.275	489.945	466.724	439.698	448.363	477.528	489.204	473.205	490.635
band9	461.195	451.809	477.635	498.582	460.261	480.631	499.548	457.866	492.262	482.333	432.61	455.426	424.522	437.486	437.36	420.127	444.436	453.587	453.209	458.782	445.384	421.957	508.928	465.115	447.834	440.015	483.097	490.986	470.304	485.426
band10	437.081	437.059	451.587	444.903	454.636	444.187	469.372	455.757	444.68	499.844	430.771	424.84	357.322	386.28	439.601	398.036	412.886	422.429	426.595	444.461	414.346	405.381	507.475	424.309	408.083	440.869	449.795	478.234	441.731	432.638
band11	417.325	421.234	452.526	424.169	414.742	440.355	427.41	413.407	458.002	447.932	424.096	421.902	369.226	417.445	441.264	420.145	419.941	429.085	419.186	421.863	418.097	407.668	386.815	408.231	419.298	412.067	433.633	461.873	434.67	443.253
band12	430.281	425.622	453.748	437.479	444.5	445.803	420.168	402.945	443.646	407.292	375.167	419.932	353.78	402.22	381.177	365.782	388.868	421.178	436.837	427.532	406.926	405.107	423.312	422.686	383.609	415.007	424.139	421.533	389.705	419.003
band13	398.637	464.522	416.871	422.438	411.628	422.49	407.402	391.989	458.754	410.864	389.641	413.035	389.752	400.416	379.431	418.515	406.411	403.731	434.333	424.556	395.322	405.01	395.702	409.751	360.547	385.095	400.159	398.947	380.712	414.376
band14	385.531	418.531	388.839	402.246	402.974	410.126	409.572	377.076	428.986	411.229	381.062	389.782	369.326	377.006	374.212	397.327	386.316	380.647	391.012	358.898	354.839	380.925	403.945	393.321	387.301	376.858	407.405	407.034	368.62	395.6
band15	381.524	413.828	418.552	413.846	399.89	407.45	386.54	387.569	378.264	395.535	355.133	355.87	346.352	365.483	406.045	393.6	364.793	389.146	418.674	394.174	378.704	368.693	403.418	390.084	364.459	385.344	417.038	410.42	371.023	397.492
band16	382.296	381.184	396.929	417.549	418.434	392.884	396.695	388.127	387.384	405.698	342.118	377.175	364.098	370.697	383.109	383.303	378.696	388.011	392.772	416.491	391.976	376.439	388.74	412.255	370.831	377.98	409.826	421.097	374.448	399.386
band17	366.268	420.294	379.587	403.085	379.981	415.927	384.277	376.923	415.609	404.453	364.118	380.768	356.687	365.065	389.723	393.273	384.014	378.681	398.051	394.86	356.829	358.144	418.248	391.347	370.759	382.989	399.509	418.53	360.401	381.474
band18	377.819	399.4	404.106	432.913	385.154	397.813	392.527	370.634	402.451	408.231	369.031	350.326	352.822	362.872	378.637	388.091	385.433	370.892	361.1	377.792	392.422	378.547	397.788	387.974	361.514	371.148	391.78	404.822	355.423	379.683
band19	369.962	402.869	390.129	405.649	377.452	394.974	367.045	364.404	384.772	346.487	354.189	336.358	334.65	349.353	376.794	342.115	371.764	363.255	371.674	363.106	371.917	348.825	377.048	378.918	343.633	358.369	389.349	384.337	351.434	387.905
band20	346.599	418.2	397.529	390.946	376.05	405.867	374.083	357.68	398.12	371.163	350.149	346.904	342.533	382.155	391.582	396.909	384.049	360.634	359.584	350.676	374.746	368.939	374.38	375.028	340.401	358.227	395.162	391.165	343.657	386.39
band21	357.071	404.991	395.942	400.126	371.262	395.597	368.488	364.48	399.664	381.91	359.926	359.039	354.248	366.583	372.322	371.158	384.16	360.178	354.879	363.13	363.939	371.733	385.775	383.733	358.598	367.213	389.274	403.361	349.625	378.486
band22	354.893	359.288	397.245	408.582	368.346	386.274	370.805	355.141	394.648	390.102	343.152	343.804	328.435	372.271	360.64	393.697	374.629	360.559	377.705	366.304	361.567	361.475	401.425	384.725	353.302	359.759	389.011	400.716	347.712	374.663
band23	355.238	381.747	387.671	405.772	375.038	384.156	362.045	353.212	381.034	360.944	353.876	349.519	348.15	349.157	388.042	350.133	368.55	358.259	366.03	353.471	348.479	356.663	379.812	377.901	340.061	360.973	386.067	375.22	338.018	359.062
band24	357.469	392.234	380.49	398.944	371.252	380.6	367.235	356.181	395.46	373.287	337.96	332.818	327.024	356.533	357.588	375.279	369.217	355.005	375.512	369.232	350.154	351.492	396.978	370.899	335.86	351.227	383.508	391.005	338.806	363.551
band25	340.721	392.994	367.248	380.21	344.89	389.043	358.56	342.81	376.359	375.333	353.226	341.174	337.304	361.835	364.466	376.976	372.609	347.835	354.698	357.713	347.91	354.892	372.495	373.498	336.086	348.335	374.904	388.855	319.217	373.986
band26	346.673	382.175	371.174	382.472	363.109	377.296	362.202	344.413	406.77	361.577	348.774	357.998	325.715	351.26	367.656	363.606	367.928	362.755	371.163	347.137	365.933	355.871	381.192	373.024	343.092	340.068	378.782	370.914	326.382	371.226
band27	327.177	373.913	375.084	408.505	361.437	388.697	360.033	346.22	373.071	374.703	339.978	337.211	320.107	352.194	366.402	372.564	359.276	356.988	354.142	351.645	351.843	345.208	387.225	376.068	338.77	352.025	374.375	386.393	320.374	364.751
band28	342.657	372.697	375.548	383.879	355.903	387.285	350.153	340.859	378.646	353.886	347.365	343.523	318.874	354.711	370.196	363.17	365.374	353.109	362.098	343.147	357.673	352.613	377.78	363.824	324.851	345.584	362.694	373.591	310.035	365.394
band29	337.11	383.047	364.252	383.723	362.079	385.224	363.362	336.263	375.763	356.521	341.786	339.407	321.948	361.413	368.093	339.303	370.163	345.742	361.381	353.799	353.5	348.1	380.31	365.856	326.281	335.661	379.191	372.925	313.498	360.614
band30	332.338	375.153	357.865	401.828	355.861	382.541	351.785	335.079	365.772	349.82	346.916	349.988	327.296	348.558	380.412	360.273	361.993	345.729	359.447	348.809	352.263	340.936	390.435	370.966	323.281	335.863	376.669	370.827	323.539	363.735
band31	329.675	360.797	370.623	399.646	343.585	372.403	355.345	338.793	355.936	360.652	345.337	341.854	335.935	344.394	378.482	343.558	358.667	342.028	342.17	352.956	350.498	330.082	383.84	363.838	330.647	343.639	369.749	374.961	312.459	349.983
band32	328.848	371.753	360.245	378.192	356.68	372.673	350.223	334.439	388.818	356.343	349.068	332.347	335.476	345.967	364.675	373.903	358.976	341.362	350.367	341.778	343.111	339.307	376.71	357.573	322.19	334.171	366.708	363.819	306.363	351.741
band33	318.295	372.534	352.474	383.056	342.99	378.869	354.843	330.999	368.94	358.036	335.412	342.146	332.409	351.317	360.977	357.442	356.692	335.551	351.905	358.15	337.54	341.486	384.665	355.517	316.453	331.533	366.111	366.384	305.835	353.346
band34	318.742	370.488	361.135	380.621	340.611	377.166	345.147	327.816	367.697	352.842	340.291	321.718	322.552	346.981	359.293	357.582	357.027	335.97	337	323.099	337.663	334.083	377.168	356.623	309.998	328.055	368.739	371.223	299.172	353.512
band35	326.284	366.147	353.835	383.549	338.742	370.842	336.583	330.404	368.667	344.618	332.334	334.914	316.948	341.801	360.453	345.103	355.048	331.199	335.844	323.246	341.092	323.01	369.635	360.313	309.959	329.743	360.638	368.988	300.637	344.38
band36	316.49	360.288	352.065	378.008	339.233	372.835	339.387	319.048	361.779	350.53	330.885	339.353	312.117	345.207	362.309	356.297	354.768	331.826	339.698	328.747	332.14	335.377	360.502	348.824	305.085	320.095	361.074	360.457	298.904	349.727
band37	321.77	361.597	348.813	381.923	336.669	375.891	346.29	319.846	353.621	351.818	331.307	327.979	318.563	338.197	359.379	348.018	351.36	331.385	341.3	339.782	330.199	322.174	375.675	352.548	310.051	328.334	357.418	361.347	294.721	340.255
band38	320.724	365.953	350.487	380.774	341.163	367.778	343.028	322.03	362.487	350.869	335.409	326.407	321.463	343.843	369.177	343.752	352.798	329.829	333.528	337.522	330.28	327.184	379.423	352.683	307.622	321.742	361.953	361.097	296.101	347.993
band39	315.026	354.675	345.229	374.026	333.13	372.573	333.6	318.143	360.17	342.022	336.724	330.809	316.385	348.533	363.219	348.897	354.806	324.583	331.16	329.116	338.292	331.188	375.205	357.043	302.293	315.955	354.847	356.135	295.368	356.256
band40	311.12	362.828	357.752	378.931	334.198	376.397	337.673	316.974	365.789	346.073	339.288	326.87	309.459	344.541	369.862	340.139	349.758	326.896	335.274	330.249	332.54	324.319	370.58	345.929	304.581	322.016	356.8	356.164	292.793	345.069
band41	316.995	365.525	346.097	385.549	327.471	371.094	349.893	318.241	360.984	362.496	329.904	316.574	309.252	341.343	353.199	332.43	352.54	322.49	330.6	319.365	324.251	324.231	384.373	352.185	313.51	327.27	358.003	369.262	290.646	339.977
band42	310.83	360.856	345.923	377.708	337.639	367.47	337.108	317.939	356.526	343.586	339.282	312.728	316.43	328.93	353.855	337.339	349.285	319.355	323.398	308.543	325.604	320.147	378.34	352.013	302.268	318.575	359.739	356.986	289.497	335.015
band43	305.084	350.303	340.739	380.59	336.908	371.341	342.38	319.438	359.255	354.229	332.393	317.121	302.696	336.642	352.82	340.218	346.304	315.14	323.044	314.423	323.401	317.81	375.137	351.352	303.776	326.057	359.729	365.046	293.648	337.943
band44	303.369	356.019	340.384	374.282	324.622	361.865	336.395	312.767	356.876	341.45	334.898	309.795	310.415	334.476	361.897	341.533	348.333	309.815	327.167	310.082	322.095	320.1	370.173	345.707	297.27	314.467	354.197	354.239	282.787	339.137
band45	302.177	352.116	341.861	376.882	322.903	368.187	325.835	309.104	352.349	340.557	335.536	307.14	301.572	339.721	350.836	332.721	344.478	309.536	322.079	308.993	319.121	316.94	367.577	340.735	292.649	312.421	350.058	354.622	281.075	339.213
band46	301.77	355.012	337.194	380.772	336.282	368.124	334.523	308.579	356.897	346.83	336.576	312.705	303.807	327.148	348.916	334.527	340.99	307.733	321.595	310.99	315.507	312.952	370.168	348.085	300.856	311.801	354.464	354.319	283.552	330.561
band47	306.28	355.425	338.565	377.477	327.966	364.883	327.523	309.792	344.864	340.35	327.096	315.805	302.665	327.073	354.138	320.582	339.904	307.277	321.416	308.294	319.465	310.508	362.353	340.962	295.15	307.788	352.939	353.196	275.508	329.619
band48	294.842	345.856	336.29	367.603	324.311	366.792	325.048	306.556	342.943	337.144	323.427	310.205	303.585	332.89	343.174	333.364	342.849	311.186	320.34	318.392	316.531	312.365	365.567	344.736	300.778	308.059	350.717	348.707	274.964	338.629
band49	297.058	351.272	328.871	375.672	320.54	364.992	327.988	306.395	350.34	339.815	331.57	313.263	304.137	329.52	348.891	339.473	340.116	308.438	317.165	314.976	309.983	306.799	367.882	344.501	294.977	311.561	347.92	350.426	280.556	331.421
band50	297.196	344.809	338.397	374.936	324.859	364.164	328.925	305.915	340.915	334.667	328.978	308.114	300.502	333.224	347.878	336.067	339.878	308.617	323.267	314.447	314.102	310.806	361.77	342.771	291.217	305.195	346.433	348.341	275.98	331.888
band51	289.788	350.853	334.045	369.597	318.563	362.669	325.532	303.077	349.811	335.141	323.254	310.774	301.613	330.894	343.498	348.418	338.172	303.419	319.498	312.116	310.59	312.171	359.54	341.338	290.229	309.262	350.648	346.167	272.105	332.044
band52	295.204	348.022	327.923	373.536	326.349	361.737	323.178	299.933	344.924	336.557	325.059	306.789	302.915	328.34	350.225	328.509	340.591	304.522	310.933	305.693	311.509	309.024	366.355	339.5	289.9	304.103	345.702	348.621	273.513	331.598
band53	288.686	353.441	328.184	371.267	319.459	364.574	326.497	303.407	342.274	335.032	328	301.565	303.876	331.001	349.72	329.588	336.466	303.268	310.298	301.669	308.491	307.034	357.072	343.499	290.762	307.206	348.312	350.868	270.762	331.957
band54	284.567	352.766	330.161	367.938	318.242	362.475	320.178	297.419	346.418	330.545	323.461	301.049	294.909	330.614	346.383	331.533	334.262	301.149	311.958	303.642	308.742	308.16	364.668	336.823	282.171	301.727	345.028	348.4	268.531	328.609
band55	291.48	338.284	331.165	364.01	315.375	359.162	320.677	297.7	339.561	334.596	318.898	300.823	291.396	325.026	338.788	331.661	331.856	297.639	308.293	299.085	309.28	301.469	362.337	336.621	283.705	302.354	343.388	344.141	268.3	323.293
band56	286.959	342.675	323.071	375.413	320.249	359.152	318.717	296.841	337.878	336.051	320.941	300.663	295.161	322.055	336.627	330.988	334.241	300.327	306.951	305.034	306.424	304.934	359.325	336.569	283.412	299.494	347.797	346.273	267.631	325.516
band57	286.898	343.791	319.561	363.082	317.041	360.283	323.83	296.486	338.057	329.112	324.944	305.858	292.015	318.478	341.489	326.691	333.744	299.211	313.135	300.089	308.697	296.589	365.993	338.29	283.582	301.805	341.671	341.295	264.224	319.322
band58	283.492	340.084	323.887	364.418	315.692	359.478	316.927	291.887	338.549	327.99	319.149	296.381	293.189	317.546	337.913	331.824	329.461	293.787	309.456	297.778	304.341	299.047	356.955	336.09	279.002	298.235	338.271	342.359	262.519	321.879
band59	277.859	343.025	323.923	367.436	314.223	360.824	318.338	294.928	338.906	323.603	328.765	299.886	292.793	315.093	345.553	327.915	330.617	295.133	310.698	297.679	302.344	300.782	357.043	333.967	283.37	301.056	342.912	344.63	264.502	322.295
band60	279.919	346.756	320.119	358.538	309.855	356.553	315.725	289.932	340.253	320.314	317.232	296.682	291.583	318.668	346.045	328.37	329.717	293.077	309.926	299.468	303.291	300.856	356.575	328.144	277.005	294.763	339.415	340.444	260.629	318.169
band61	277.45	342.422	317.894	364.11	306.61	356.699	311.303	291.319	338.694	327.134	319.728	294.535	292.702	320.547	340.904	324.588	328.396	290.069	307.86	289.283	300.843	298.6	356.752	330.535	277.189	293.336	339.819	339.67	260.667	318.064
band62	278.806	338.328	323.523	361.531	310.572	356.528	309.872	288.19	341.08	322.168	322.44	290.544	288.304	318.6	341.81	325.315	330.886	291.029	300.805	300.082	297.362	295.749	359.517	331.418	274.997	295.732	337.474	338.273	259.412	315.973
band63	276.784	337.25	318.277	361.503	312.472	356.973	308.288	289.54	338.975	325.783	319.864	288.747	292.452	314.276	341.158	317.727	328.871	288.872	300.412	291.396	296.988	296.612	353.457	329.984	274.809	290.698	335.461	333.493	256.347	320.282
band64	278.058	344.319	310.616	363.844	309.799	356.001	313.78	288.385	334.524	328.148	317.495	289.265	289.809	315.01	336.466	322.412	328.26	288.099	302.177	290.853	296.396	297.126	350.885	331.005	274.843	294.139	341.019	336.208	255.704	320.05
band65	273.111	340.062	311.516	359.033	308.029	352.219	308.502	284.603	339.207	322.562	317.359	282.121	289.654	319.137	334.148	316.261	328.096	289.248	299.837	290.352	297.716	296.867	358.683	328.805	271.578	287.607	334.714	334.066	252.774	320.681
band66	273.783	341.712	309.687	363.492	306.479	352.373	314.382	285.87	333.455	319.474	316.938	288.3	289.702	314.157	332.109	317.521	325.711	287.326	302.947	292.474	297.047	295.493	351.45	330.199	275.438	292.613	334.467	337.314	254.201	317.018
band67	271.728	335.397	318.029	355.618	305.723	350.262	309.932	282.816	337.37	319.258	316.071	291.928	290.239	312.546	339.704	318.309	325.068	289.077	302.567	299.044	292.417	291.613	351.015	325.019	269.074	288.438	334.029	332.464	253.721	314.147
band68	270.509	334.641	312.565	352.19	307.324	350.781	308.105	283.141	331.793	323.253	313.87	291.032	288.602	313.945	341.846	320.739	324.063	287.269	300.393	290.7	293.157	293.094	354.882	325.324	269.674	289.479	334.767	335.045	252.692	313.633
band69	277.911	333.666	313.113	352.049	305.095	353.914	306.86	281.759	331.791	316.17	314.672	290.816	291.011	315.141	336.01	316.164	325.599	287.006	300.472	287.123	295.839	289.344	358.09	324.355	268.206	284.953	332.48	332.435	247.761	315.24
band70	270.26	337.947	307.719	361.572	308.196	349.834	309.933	283.556	334.54	322.399	313.926	288.568	284.424	314.322	338.762	326.394	325.753	286.577	304.595	293.174	298.351	293.052	350.712	326.904	272.253	286.567	331.747	330.06	252.83	318.311
band71	268.76	335.387	302.284	365.438	304.897	355.111	309.232	282.52	334.724	320.762	309.848	287.358	285.483	314.779	331.508	321.848	323.877	284.028	301.326	290.201	289.55	290.26	353.84	326.24	269.217	289.148	333.35	331.53	250.3	313.115
band72	271.901	331.756	306.935	362.995	308.54	347.828	304.055	280.681	331.138	320.908	311.254	284.233	283.452	308.414	331.315	316.261	322.424	281.68	299.547	286.928	295.111	289.254	351.752	322.077	267.03	285.164	331.864	327.272	250.874	314.973
band73	267.219	329.75	305.868	356.721	299.377	348.536	305.673	278.191	330.322	319.112	306.972	288.267	285.867	307.91	333.45	321.4	323.255	281.499	298.958	284.519	294.074	289.607	354.23	323.793	269.785	283.138	331.652	332.223	246.29	313.724
band74	269.822	328.531	308.297	361.141	303.327	347.103	303.11	281.142	331.354	316.971	312.808	283.289	286.685	311.092	332.424	320.509	321.079	282.447	295.77	288.28	292.348	287.554	353.127	324.709	264.082	285.432	332.172	329.002	250.032	312.379
band75	266.414	336.956	306.829	361.067	298.343	350.238	307.872	280.045	333.046	320.078	306.712	283.74	282.863	309.387	334.929	315.758	320.351	282.962	297.686	289.512	288.983	288.581	350.205	321.908	265.888	283.601	327.417	327.668	244.51	311.458
band76	269.097	335.934	309.294	357.703	300.485	351.347	310.017	279.666	329.28	320.088	310.582	286.23	282.915	310.246	328.746	317.715	320.602	280.724	297.849	290.038	294.062	285.638	359.66	322.91	268.391	287.558	330.37	329.436	247.652	309.348
band77	266.295	330.941	302.2	359.097	297.17	348.811	305.752	277.4	329.462	320.776	301.916	280.975	284.58	308.38	326.537	317.509	319.775	279.836	296.619	284.048	289.109	285.764	347.772	321.463	264.1	282.767	329.486	327.698	245.036	309.43
band78	264.889	332.178	307.035	354.038	299.974	347.927	303.71	274.764	325.12	313.73	312.477	281.126	281.026	305.193	336.151	314.667	317.671	279.09	295.967	287.495	290.092	283.103	345.805	320.507	261.075	282.228	324.467	324.993	244.101	309.597
band79	267.615	336.178	304.106	360.023	300.78	349.836	301.128	275.861	331.455	317.102	309.464	279.477	283.313	309.032	333.267	320.745	323.037	280.081	294.212	284.57	290.441	290.769	347.817	320.041	263.99	281.327	327.373	322.475	245.35	313.041
band80	263.382	332.891	306.494	353.995	296.188	347.79	304.097	274.062	329.175	318.229	306.303	282.707	284.787	310.575	332.148	322.133	320.232	279.045	297.637	281.768	291.621	287.732	347.43	320.086	262.688	280.77	324.64	323.733	240.871	311.33
band81	265.017	334.25	305.642	354.354	293.748	345.316	301.72	274.094	330.63	316.859	305.059	280.181	280.946	307.254	330.013	318.964	317.862	275.862	294.616	285.58	286.114	281.846	351.312	318.157	261.434	279.25	322.894	324.68	239.548	306.189
band82	266.967	333.081	304.387	356.433	299.65	345.247	299.518	274.768	332.143	313.457	306.854	280.053	283.333	307.517	334.637	320.37	319.038	277.315	291.458	286.993	292.384	284.877	344.285	319.567	259.643	277.443	325.971	321.8	241.417	306.791
band83	265.959	336.797	301.981	347.39	296.415	347.134	298.152	274.009	328.685	312.336	309.548	274.889	282.978	307.912	328.196	318.57	321.648	277.654	294.723	284.137	290.595	285.303	349.517	317.614	260.5	279.91	322.82	325.264	242.371	307.632
band84	261.267	328.066	304.071	350.887	296.438	346.747	300.272	271.306	328.103	310.959	306.978	275.926	280.652	305.76	330.547	316.176	318.276	276.743	293.34	280.119	288.144	284.841	349.692	317.872	258.101	277.885	322.64	324.085	240.857	307.777
band85	261.234	330.456	307.452	358.072	294.286	343.518	297.56	271.767	326.697	307.929	309.876	276.302	278.039	302.985	330.174	314.158	315.883	273.835	292.747	282.256	285.133	279.782	347.84	316.305	257.667	277.982	321.633	323.531	240.335	303.517
band86	261.783	329.394	301.765	353.038	294.387	344.028	298.428	272.483	326.023	312.574	309.115	276.974	280.843	303.813	328.99	317.394	316.449	275.904	293.37	275.263	289.024	283.78	349.495	314.602	259.228	276.329	323.524	324.074	239.434	306.481
band87	263.5	328.531	302.155	353.4	294.32	342.49	299.895	268.849	326.885	315.012	308.127	278.433	276.967	305.899	324.215	320.315	317.309	273.929	297.66	285.113	286.09	279.911	344.11	316.129	257.373	275.409	321.435	319.453	236.295	307.165
band88	261.736	332.244	294.013	353.687	293.716	343.297	295.978	272.597	326.795	313.401	302.762	273.858	276.052	302.463	323.431	316.273	315.156	274.124	290.121	280.59	285.656	281.917	345.265	317.282	256.986	273.634	320.769	320.071	239.052	305.196
band89	254.134	333.516	299.177	352.438	292.296	342.95	297.493	269.03	330.451	308.912	304.359	277.821	280.07	305.843	327.273	322.661	316.031	272.368	292.093	281.901	284.057	282.269	342.27	315.24	258.413	275.164	319.126	318.842	237.772	305.231
band90	260.8	326.981	303.332	359.315	293.274	344.915	300.475	270.7	324.74	311.684	302.938	271.481	273.109	303.006	331.035	316.715	314.433	270.342	288.609	281.874	286.332	279.311	346.217	317.789	259.122	277.992	319.063	320.249	238.468	303.822
band91	257.955	328.803	301.884	352.428	291.597	343.099	296.053	268.744	328.262	309.299	303.124	270.825	275.504	301.997	325.518	316.582	315.106	271.276	287.572	280.29	285.683	279.93	347.248	316.242	256.71	276.217	321.297	319.19	235.067	302.459
band92	259.946	331.131	298.41	349.618	294.359	343.74	292.312	268.322	326.338	309.764	302.901	273.688	274.143	301.508	321.264	316.776	315.279	273.397	292.119	284.659	284.529	278.099	345.465	315.448	253.694	275.58	319.274	318.568	236.809	305.976
band93	259.51	327.872	298.271	350.362	290.151	340.968	294.747	267.842	322.864	311.214	303.307	271.321	270.426	302.765	324.167	317.63	314.62	269.991	290.83	281.901	286.96	280.73	345.965	313.932	255.235	274.145	318.395	321.211	235.688	305.564
band94	257.715	324.678	293.858	351.59	294.326	341.814	295.398	265.748	324.738	309.406	306.594	270.826	277.359	298.514	323.27	317.345	313.076	268.757	286.749	277.539	285.408	280.323	343.85	312.356	252.805	273.783	317.959	317.516	236.164	301.149
band95	257.305	328.128	297.774	348.182	293.667	340.538	292.06	264.429	322.549	309.258	300.601	270.76	276.889	300.538	322.273	313.321	314.257	269.112	290.214	279.512	283.891	279.314	342.07	312.341	252.495	272.754	315.997	317.778	235.858	301.607
band96	255.161	325.394	299.9	348.951	292.396	338.919	295.147	265.196	317.683	306.071	303.539	269.135	273.53	297.391	323.492	314.642	312.145	268.05	286.57	278.096	281.647	274.382	340.315	312.946	252.792	273.096	317.386	317.425	233.784	299.61
band97	254.014	323.403	294.245	344.546	286.79	338.439	293.862	262.594	320.074	306.518	303.811	266.986	274.374	297.848	322.92	314.376	310.4	268.672	286.795	275.451	281.358	278.591	345.317	310.021	250.359	272.867	314.601	316.917	233.143	301.57
band98	255.49	323.856	296.458	348.495	287.872	337.72	292.703	262.908	319.434	304.835	301.746	265.912	275.289	298.139	321.836	310.048	309.763	266.702	286.321	275.119	280.649	275.51	338.91	308.15	249.315	271.687	311.349	314.971	233.341	299.288
band99	253.623	321.984	290.765	347.569	289.304	338.003	293.465	263.62	317.099	309.662	297.625	266.812	271.385	299.32	320.206	315.248	309.23	265.964	286.419	275.502	281.72	276.656	342.397	311.039	252.456	273.2	315.909	315.384	232.978	299.558
band100	249.814	325.928	291.755	347.408	287.386	337.794	290.245	261.561	318.386	307.915	298.985	262.905	271.693	296.143	320.183	307.067	309.354	264.335	283.926	276.365	279.45	275.047	336.23	308.802	249.341	270.082	312.756	314.943	231.377	298.123
band101	252.627	321.688	288.171	348.577	288.271	336.945	291.167	261.501	316.779	305.202	298.257	265.079	272.539	295.214	321.212	308.952	306.875	265.938	286.416	278.884	282.042	274.031	340.067	308.179	247.985	270.943	311.239	313.542	230.855	297.222
band102	251.827	322.519	292.465	346.041	286.138	337.087	292.085	260.875	315.984	305.032	299.437	266.072	273.746	296.183	318.875	313.776	309.941	265.81	287.123	276.877	282.4	273.271	341.205	309.276	248.164	270.892	312.253	314.754	230.892	296.163
band103	251.624	321.262	291.616	343.979	287.331	337.081	291.298	259.416	318.138	304.302	297.251	265.14	269.785	293.549	318.73	305.733	306.722	264.938	285.116	275.945	275.467	270.438	340.46	307.789	246.62	267.22	311.368	313.249	230.546	295.107
band104	253.365	318.931	290.655	343.564	287.997	334.763	288.545	259.514	317.595	305.17	302.084	262.437	267.733	293.202	322.109	304.37	308.082	264.673	283.87	270.225	281.614	272.754	336.83	307.746	246.359	267.924	311.854	312.722	230.525	294.912
band105	249.931	322.116	287.506	345.464	283.931	334.476	286.842	257.719	318.789	302.776	300.263	259.881	272.376	294.217	313.125	306.333	307.922	262.272	281.73	270.584	275.92	271.529	338.353	306.154	246.659	267.75	311.902	310.633	228.204	295.942
band106	247.365	322.538	287.69	348.177	283.265	333.207	287.545	258.992	319.949	300.922	301.18	262.591	271.413	294.954	316.601	318.485	308.133	261.338	280.235	274.99	277.751	271.395	334.962	307.971	245.264	266.883	311.085	312.785	229.56	298.138
band107	249.504	324.341	285.655	343.069	285.576	335.961	292.077	258.715	319.175	301.214	300.913	265.923	272.348	295.239	318.695	315.976	306.045	264.344	283.002	274.73	277.522	271.087	340.392	306.84	244.718	268.352	310.328	310.932	229.472	294.707
band108	248.877	320.259	290.768	342.323	285.974	332.459	287.25	257.152	315.756	303.664	301.666	263.251	268.563	292.807	315.559	310.861	306.865	262.909	280.937	277.242	278.912	270.776	335.39	307	244.094	266.92	311.363	313.184	227.972	295.174
band109	249.859	319.691	289.526	345.364	283.616	333.174	285.665	257.177	316.846	301.26	299.746	261.439	267.341	293.306	315.505	305.915	304.106	261.794	283.326	272.225	274.123	268.342	335.085	306.116	245.322	268.16	309.838	309.059	228.122	293.835
band110	245.969	317.331	289.829	341.964	280.418	330.68	283.77	255.073	315.623	298.886	300.954	264.411	265.65	290.066	321.559	304.745	304.476	261.97	281.295	274.396	273.202	268.559	333.808	303.052	241.591	265.222	307.459	309.037	226.066	291.062
band111	244.946	319.491	286.726	336.879	279.937	328.787	287.04	256.499	316.131	299.633	302.641	261.454	266.267	290.822	320.797	313.091	307.024	259.792	282.184	273.375	275.993	268.222	332.342	306.037	243.636	265.642	306.624	309.681	227.422	289.84
band112	240.754	315.356	287.374	339.485	279.509	330.498	286.235	252.98	314.025	298.041	300.641	261.105	268.487	289.861	314.084	308.927	302.751	259.714	281.76	270.491	271.569	268.837	333.873	302.556	240.927	264.37	305.258	309.202	224.622	291.691
band113	246.113	322.609	288.697	337.167	280.472	330.178	283.873	252.844	314.586	297.377	303.91	264.395	266.387	293.334	317.129	310.515	304.919	261.018	280.63	276.28	277.721	269.948	332.86	301.795	237.571	263.002	304.141	308.284	223.126	293.508
band114	243.251	316.503	291.135	338.51	279.235	326.89	280.913	252.915	315.143	294.53	304.567	263.854	267.08	288.876	320.502	309.455	303.228	260.587	280.914	274.109	271.692	266.968	331.373	302.957	242.106	263.323	306.32	306.085	222.156	290.023
band115	242.281	318.316	291.577	339.992	278.076	325.227	280.153	252.136	311.29	293.384	306.272	263.318	268.278	289.957	316.489	306.485	302.592	261.71	281.165	274.386	272.747	265.32	332.46	301.523	239.349	262.778	305.027	306.075	223.829	289.006
band116	245.97	317.684	292.894	335.969	279.562	326.508	281.393	251.824	312.676	297.757	306.663	263.353	267.591	287.165	322.502	303.261	304.722	262.876	285.47	274.857	273.465	266.262	329.09	302.161	238.439	263.278	306.252	307.264	225.508	289.71
band117	240.052	321.541	295.268	337.644	275.614	326.256	281.945	249.982	313.545	298.097	308.276	266.349	267.317	289.322	320.543	306.139	302.407	263.794	285.988	278.887	271.63	267.035	332.835	300.004	238.305	261.336	304.093	306.728	222.84	289.105
band118	242.44	314.462	293.274	337.344	277.685	325.364	279.222	249.217	311.46	296.399	308.591	266.307	270.187	290.431	325.392	305.903	300.917	262.831	285.202	278.823	275.066	265.82	329.17	300.09	236.867	260.008	303.389	305.628	222.838	288.264
band119	242.995	316.881	297.013	332.269	277.499	324.538	279.207	248.062	314.607	291.672	309.746	269.77	265.713	289.098	323.804	309.261	302.471	263.084	286.428	281.526	270.791	266.296	327.685	299.186	236.02	259.183	301.876	302.999	222.661	289.74
band120	239.699	320.353	297.655	336.697	275.173	319.705	278.565	248.215	314.269	295.255	309.471	268.988	268.38	290.003	325.659	308.812	303.846	261.765	285.609	277.509	273.706	268.182	330.212	297.325	235.724	258.121	303.353	305.161	221.527	289.548
band121	238.971	320.222	295.981	332.862	274.732	322.661	275.378	245.474	318.129	295.72	312.012	268.714	271.391	290.648	327.9	310.455	303.434	263.965	286.498	278.3	268.398	265.924	324.79	295.455	235.922	256.638	300.664	300.921	218.818	288.945
band122	240.331	318.169	297.019	331.456	274.069	320.163	273.053	244.69	314.414	289.18	310.687	272.626	270.248	289.203	330.669	307.661	303.669	265.032	288.977	281.788	271.024	266.743	323.06	296.818	234.281	257.052	299.959	300.874	219.997	289.554
band123	240.216	321.441	294.455	330.574	271.399	318.078	274.695	245.358	316.451	292.939	312.43	272.507	271.104	294.638	332.566	311.685	305.795	265.745	291.426	285.15	271.817	268.761	325.582	294.517	234.795	256.192	299.095	300.804	219.526	292.148
band124	238.952	321.303	298.658	336.231	270.773	318.004	275.4	244.019	319.257	290.582	314.43	273.305	272.967	295.115	331.26	318.085	305.583	265.815	289.284	284.976	271.003	270.321	326.58	294.054	233.94	255.848	298.565	300.221	218.385	293.81
band125	242.36	325.372	300.284	334.426	275.767	319.043	274.477	245.646	322.963	289.015	315.644	272.846	275.683	292.916	333.219	315.897	308.425	267.4	289.174	282.389	273.877	270.744	323.96	295.894	233.357	256.791	299.887	300.614	219.273	291.652
band126	245.043	326.403	300.423	332.664	276.594	318.587	277.532	246.916	322.577	292.981	318.613	276.082	275.704	297.34	333.82	310.812	309.947	269.354	294.307	290.034	275.869	271.388	324.505	295.856	234.615	258.076	301.611	301.254	220.991	294.679
band127	241.487	328.516	301.184	334.321	277.906	314.089	272.732	246.42	322.83	289.309	314.675	277.596	277.322	298.087	333.595	323.909	311.396	271.026	293.326	285.836	276.192	272.78	326.125	295.237	234.176	255.304	301.97	301.804	221.021	294.92
band128	245.306	330.209	302.623	335.418	278.922	315.444	273.952	247.276	326.455	292.494	317.669	277.684	279.639	297.758	334.611	323.394	311.474	272.751	295.356	290.56	278.697	272.714	326.325	297.302	234.799	256.022	304.048	302.95	220.95	297.07
band129	247.469	330.634	303.845	339.287	280.782	315.808	278.42	247.204	327.92	295.496	321.474	281.011	282.774	301.76	338.367	319.309	314.409	274.963	296.34	294.01	279.554	277.571	328.09	297.647	234.305	258.331	304.956	303.708	220.732	300.561
band130	250.965	332.569	305.003	344.379	283.65	317.158	279.535	250.201	332.166	295.411	319.341	286.107	287.33	302.703	340.248	326.764	317.088	278.193	301.912	299.167	281.946	276.244	332.988	301.957	238.325	260.773	308.926	307.461	224.226	300.186
band131	250.331	336.512	307.603	348.487	285.754	322.671	281.405	253.561	334.223	302.594	323.607	287.596	287.139	307.749	342.682	328.642	320.369	280.03	303.981	301.512	283.849	282.846	336.88	305.216	240.512	263.58	312.022	311.475	227.011	308.296
band132	252.73	341.741	311.687	347.741	285.707	323.387	284.97	253.944	335.23	303.083	329.142	289.282	289.159	309.34	348.318	330.042	321.454	282.791	307.302	306.249	288.694	282.573	340.425	305.245	241.426	264.981	314.262	313.434	227.38	309.104
band133	252.64	345.628	315.035	350.577	290.817	326.21	288.163	255.552	337.264	307.088	333.517	288.614	291.883	313.884	352.186	335.867	326.208	285.229	304.481	301.28	286.87	287.542	341.098	310.335	244.252	266.838	315.756	313.304	229.124	312.146
band134	257.514	347.666	319.723	356.795	291	330.713	289.452	258.565	343.66	309.358	337.889	292.111	294.143	315.183	352.887	343.473	329.919	287.881	305.902	305.611	292.552	290.414	343.548	312.565	247.591	273.609	319.563	320.595	231.589	314.765
band135	259.314	351.744	321.619	360.308	296.021	332.794	291.018	261.829	344.216	309.401	335.155	295.151	297.328	316.645	356.193	341.709	331.238	290.479	312.986	310.782	294.587	291.673	346.067	315.948	245.098	271.089	323.181	321.889	233.288	317.17
band136	260.822	353.881	323.732	367.241	299.625	337.017	295.762	263.191	348.715	314.443	339.195	298.623	301.872	319.059	360.691	343.2	335.796	293.559	317	311.833	298.768	294.986	353.623	319.379	252.165	275.928	326.804	324.743	237.279	321.389
band137	262.202	356.725	324.497	366.356	301.182	341.459	299.912	265.937	354.315	317.818	346.545	300.898	304.62	322.21	364.302	345.873	338.976	298.813	321.786	317.222	303.524	297.485	356.3	322.04	253.39	278.456	331.923	330.949	237.213	323.169
band138	269.055	362.806	330.303	369.454	305.616	346.357	304.668	269.241	353.639	319.827	347.681	306.721	303.591	329.478	370.797	352.867	342.43	300.936	319.544	315.679	304.747	301.765	360.072	326.054	255.984	281.325	332.28	332.191	240.519	328.528
band139	269.66	364.194	332.99	374.587	307.161	350.066	306.915	272.097	357.77	328.922	357.381	309.074	310.824	330.969	371.768	357.739	345.48	304.86	325.33	324.751	308.386	303.889	362.197	331.033	258.332	284.723	335.508	337.438	244.212	332.385
band140	270.007	366.3	334.739	378.621	310.795	350.845	308.667	274.362	361.044	327.934	355.966	309.7	314.507	333.896	377.678	358.582	346.933	306.153	326.984	323.13	308.5	304.687	365.115	332.789	260.783	286.813	337.89	338.417	245.378	332.587
band141	274.898	369.572	339.135	377.987	314.695	352.914	308.347	276.352	366.94	329.854	361.399	310.877	316.45	337.902	380.45	362.436	351.858	309.103	330.653	323.7	310.964	309.918	364.14	333.676	261.514	287.565	337.894	339.783	245.147	338.466
band142	273.899	373.95	343.068	379.987	317.17	353.355	309.15	276.854	371.386	328.946	363.938	315.184	317.096	336.926	385.553	364.818	354.087	309.685	331.242	327.085	315.446	312.058	370.51	334.223	262.587	291.169	341.632	341.804	248.076	340.319
band143	276.342	366.228	345.626	386.423	314.195	356.857	309.177	277.466	366.108	328.786	362.056	316.191	320.215	338.199	385.209	365.952	353.001	311.689	334.735	336.259	315.642	311.882	369.363	336.092	264.363	290.869	342.456	344.536	248.4	338.885
band144	275.787	373.238	345.339	387.249	318.493	357.162	312.908	278.931	371.418	334.735	367.517	319.325	319.62	340.546	386.09	366.503	356.347	314.411	337.874	330.392	316.766	312.6	372.635	338.31	265.309	292.6	344.18	344.437	248.418	342.897
band145	277.818	375.188	347.403	387.469	317.419	360.211	314.953	280.141	372.703	336.029	368.35	318.951	322.578	340.339	387.643	367.715	356.543	313.346	336.444	332.024	317.413	313.319	374.228	340.73	267.241	293.229	345.217	346.986	250.294	343.028
band146	280.703	379.506	346.919	388.826	320.23	362.003	318.277	280.922	376.237	334.674	369.567	321.996	321.637	346.673	391.447	373.115	360.485	315.464	338.879	336.358	319.82	316.892	379.413	342.026	269.043	296.906	347.15	349.143	252.407	343.881
band147	277.505	379.938	343.958	389.131	321.001	362.146	319.468	281.068	371.894	340.367	372.731	318.172	324.454	343.372	391.244	373.509	359.727	317.854	339.04	334.529	318.426	317.757	374.712	343.293	270.593	297.403	347.668	351.301	252.3	344.62
band148	280.236	382.694	346.713	391.318	324.647	364.812	319.835	283.812	376.402	338.163	374.632	326.028	326.543	349.032	392.836	376.206	365.477	320.571	341.912	340.451	326.007	320.143	380.63	347.623	271.53	300.243	352.132	350.966	254.913	348.653
band149	281.74	383.191	350.897	394.431	325.117	368.396	321.68	284.436	379.016	339.319	372.96	327.649	327.507	347.871	390.701	378.455	365.571	322.114	341.574	339.177	323.099	320.52	380.81	347.521	271.397	301.607	353.883	353.157	254.896	350.706
band150	285.373	386.459	350.932	393.818	327.155	369.404	324.02	286.829	383.639	342.37	374.638	330.563	329.787	353.165	398.367	381.006	366	322.645	344.207	340.942	327.176	322.94	384.572	350.047	274.184	304.166	354.306	354.95	256.276	351.287
band151	285.247	388.631	351.11	399.241	326.491	369.715	326.847	288.635	383.687	343.462	373.898	329.268	335.026	351.818	394.476	379.8	367.976	324.229	344.379	342.382	328.282	324.006	387.53	350.829	276.603	304.498	356.172	358.06	258.904	354.107
band152	283.497	385.259	349.113	395.292	327.459	369.607	324.777	287.248	378.995	344.538	378.378	330.789	330.102	349.574	399.598	378.479	367.032	323.376	347.795	343.556	326.972	322.317	384.935	349.908	274.15	302.509	355.635	355.054	256.422	351.641
band153	288.923	391.122	355.1	401.672	329.437	372.868	322.98	288.602	386.418	343.628	377.266	333.782	335.263	354.849	397.579	386.836	370.253	326.506	347.819	349.386	330.287	326.842	388.493	352.537	275.415	304.852	356.158	355.798	258.656	353.907
band154	287.67	390.894	353.623	402.205	332.27	373.173	329.662	290.763	383.825	345.392	380.375	336.484	335.759	356.327	402.273	386.758	370.329	328.074	352.167	350.437	331.822	328.513	386.897	352.332	277.779	307.135	358.636	359.762	258.662	355.3
band155	290.037	390.959	354.003	403.654	330.928	375.395	327.235	292.252	383.437	347.18	379.957	337.412	336.393	355.035	399.299	383	371.728	329.203	349.526	345.826	333.019	328.801	389.805	355.158	279.718	307.44	359.115	360.271	259.663	356.448
band156	291.038	396.194	357.268	402.031	333.915	377.639	330.725	291.403	388.446	347.311	384.957	338.272	335.554	357.298	409.9	384.321	373.226	330.695	351.779	350.433	333.834	329.328	388.408	355.101	280.441	308.584	361.027	361.979	261.719	360.32
band157	293.065	395.634	360.094	408.264	338.016	379.313	330.508	295.566	389.685	349.567	382.879	341.509	340.654	357.575	409.135	390.733	374.988	330.524	354.051	353.427	333.998	331.58	389.832	360.301	283.117	311.909	364.093	365.455	264.774	361.475
band158	291.885	392.978	361.074	404.287	333.298	380.057	332.197	295.069	389.214	351.392	384.721	342.296	340.739	360.11	409.08	389.061	377.155	332.992	355.898	353.86	336.246	332.48	393.608	355.994	282.699	311.171	362.454	366.376	263.087	365.161
band159	293.639	398.438	361.252	402.364	334.276	382.12	331.142	294.251	390.653	350.664	385.557	343.607	341.283	359.326	410.717	392.097	374.903	333.522	355.449	352.901	333.185	332.68	394.21	356.822	282.01	313.135	362.543	363.975	264.44	361.9
band160	293.064	394.881	363.781	404.451	334.232	380.186	333.202	295.003	391.802	348.63	388.87	343.461	341.798	360.804	411.666	389.006	377.311	334.669	353.258	356.819	335.052	333.744	394.36	359.386	283.141	312.523	362.406	363.953	264.297	364.38
band161	296.679	396.741	364.029	402.605	337.836	382.266	333.952	294.947	388.662	351.358	389.743	341.704	343.346	362.069	416.46	392.03	376.499	334.876	354.207	354.3	337.749	333.875	395.387	358.736	285.278	313.63	365.002	365.653	266.096	365.093
band162	294.427	400.997	363.145	409.133	338.236	385.007	335.03	297.701	393.301	353.345	391.09	346.237	341.754	362.767	414.023	390.606	378.669	336.593	355.312	351.068	340.074	334.944	398.3	359.407	284.475	314.911	366.81	366.316	266.346	364.446
band163	294.757	400.381	362.387	412.995	336.736	383.571	335.757	298.75	392.055	355.29	389.783	351.968	341.846	363.312	416.238	391.406	379.389	338.697	359.316	354.375	337.891	336.572	395.125	360.676	286.126	315.107	365.647	367.278	267.094	364.852
band164	297.34	399.475	367.548	409.154	337.94	387.451	335.738	299.408	395.007	356.976	389.882	350.025	344.417	361.682	417.463	396.776	377.968	338.877	363.188	356.065	338.749	337.42	398.938	361.291	285.893	317.592	367.411	369.61	268.4	365.324
band165	299.524	403.256	370.429	412.441	342.271	388.522	337.657	301.886	397.715	359.883	392.904	353.993	346.235	366.207	419.415	394.594	379.856	339.487	363.426	359.628	340.585	337.66	398.635	363.227	288.665	318.835	369.418	371.752	270.454	367.128
band166	300.815	401.125	373.7	412.21	340.21	389.994	340.297	301.43	393.182	356.26	395.827	351.667	345.702	366.473	424.643	395.303	382.161	342.427	363.374	358.491	342.855	336.892	399.272	364.557	291.543	321.84	369.589	372.327	269.556	369.594
band167	299.399	406.288	372.019	412.182	342.387	389.864	338.088	302.278	396.683	357.071	396.05	351	345.513	364.569	422.736	395.636	382.65	340.762	364.937	359.481	339.72	339.905	398.632	363.514	290.711	319.142	370.708	372.738	272.255	371.624
band168	300.234	405.341	372.19	411.823	340.441	388.532	338.687	300.745	398.614	355.779	393.901	350.742	349.017	367.208	425.109	401.927	380.711	340.954	362.463	357.287	340.699	339.015	401.84	363.77	289.296	318.961	368.48	371.436	268.799	372.331
band169	300.825	401.728	371.274	414.879	341.057	389.252	339.8	301.722	396.12	357.932	392.533	355.861	344.226	365.895	426.013	394.309	380.53	342.379	362.323	364.218	343.441	339.858	400.095	364.954	291.325	319.064	368.264	370.868	270.224	369.878
band170	301.144	401.206	372.235	415.015	343.584	393.629	339.218	303.421	395.802	356.815	394.61	353.675	349.522	364.904	427.887	399.261	380.51	344.113	365.953	360.543	342.457	340.414	400.885	365.221	290.348	321.31	370.18	371.78	272.786	371.818
band171	300.289	405.55	374.448	414.141	344.028	389.845	339.628	302.899	396.513	356.309	397.486	356.523	348.448	368.398	429.032	405.103	384.122	344.69	367.556	363.843	343.119	341.494	400.123	366.317	289.642	319.828	373.066	372.016	271.521	373.982
band172	303.123	403.731	373.613	417.995	342.239	391.954	340.015	304.486	400.968	358.224	397.882	359.942	353.596	369.494	427.428	401.77	385.293	346.57	368.105	363.737	341.69	342.702	402.442	365.609	293.719	322.653	371.101	374.342	273.11	375.606
band173	305.558	403.269	374.21	415.515	344.276	392.245	342.323	304.381	401.083	358.946	399.393	360.66	351.607	368.61	431.698	400.588	387.17	346.643	368.588	363.962	344.659	344.837	400.545	368.621	293.157	324.121	371.329	372.313	272.534	377.192
band174	304.928	405.797	375.916	416.692	343.135	394.166	343.26	303.92	399.451	359.929	398.356	363.721	352.885	369.321	437.087	402.721	387.646	348.108	369.17	368.546	345.538	345.776	402.36	367.017	293.505	324.269	373.092	378.296	273.315	379.026
band175	303.864	409.344	374.613	418.838	346.309	393.075	343.228	306.01	401.398	360.618	395.895	360.293	349.126	368.904	431.386	404.248	386.32	348.576	369.435	369.672	343.602	345.134	402.97	367.514	293.487	324.177	373.571	375.459	274.987	378.643
band176	305.963	406	374.861	416.585	348.22	393.549	342.207	306.141	400.425	360.45	400.446	359.042	352.552	370.898	430.894	405.715	386.684	345.906	366.663	366.782	347.659	345.765	402.34	368.684	292.931	324.149	372.109	373.993	274.762	379.335
band177	303.359	408.528	374.823	418.469	345.752	393.615	344.815	306.627	401.428	360.409	396.947	358.193	355.311	369.079	431.206	397.709	386.524	347.055	366.256	363.403	346.55	347.44	403.665	368.151	293.836	324.137	372.432	375.237	274.272	378.451
band178	304.211	411.766	373.49	418.197	345.053	393.197	341.378	304.755	402.269	358.287	396.87	363.137	352.633	368.091	429.595	403.261	385.644	346.852	368.921	367.604	345.045	344.839	403.975	368.005	294.017	325.215	371.025	374.434	273.569	376.511
band179	301.569	408.291	376.645	417.582	345.761	394.333	347.343	305.455	401.678	363.55	398.576	363.711	353.576	369.905	435.219	404.636	386.165	347.467	366.581	368.922	345.183	345.047	407.605	370.441	295.814	325.953	373.026	375.643	276.019	380.026
band180	305.63	409.756	378.658	419.795	347.412	392.936	344.577	307.259	400.634	362.083	396.251	363.63	353.754	369.616	435.116	407.061	386.312	348.727	367.567	369.457	348.062	347.497	401.978	371.137	297.106	324.909	374.474	376.564	276.545	378.929
band181	307.805	409.05	374.584	416.726	346.481	395.267	343.768	305.513	405.366	356.769	399.402	366.607	354.154	371.372	425.862	404.673	389.736	349.62	368.777	370.014	351.512	347.802	402.902	369.029	293.3	324.442	372.732	374.188	275.209	379.009
band182	307.69	413.375	378.739	416.969	349.082	395.275	344.293	307.525	399.531	361.37	395.709	364.723	352.967	371.34	431.395	405.715	390.356	351.051	369.047	369.488	349.927	348.439	405.205	370.878	296.215	327.218	373.147	376.152	277.003	379.924
band183	306.622	408.794	375.674	420.264	350.38	396.701	345.305	308.918	403.943	359.698	397.963	366.03	352.735	375.395	434.389	409.236	388.829	350.065	370.774	369.474	350.156	348.826	404.947	371.304	299.172	328.235	375.095	375.663	278.572	382.795
band184	307.541	412.941	374.335	422.244	348.264	398.149	348.37	310.233	404.708	365.861	401.743	368.342	354.865	370.49	435.797	404.012	389.088	349.829	373.609	369.478	348.837	350.693	406.03	372.708	300.414	328.339	375.516	379.329	278.708	381.525
band185	308.86	413.328	381.771	422.9	350.821	397.041	349.46	311.37	406.694	365.742	399.864	367.235	356.876	374.647	436.209	411.448	390.002	350.803	371.181	374.212	348.407	352.841	412.087	375.182	301.776	330.863	376.537	382.188	281.255	387.267
band186	311.419	411.306	383.419	420.133	348.762	398.936	346.357	311.814	406.032	361.401	401.288	367.486	356.902	375.715	435.331	410.933	390.604	352.689	375.988	377.034	352.837	353.534	405.005	373.244	301.25	329.314	373.678	378.39	281.151	385.631
band187	310.203	415.903	382.742	423.169	354.031	400.106	349.828	311.479	404.234	366.496	403.08	368.56	361.098	376.393	439.119	410.176	392.233	354.37	375.556	378.614	350.915	352.515	409.308	373.261	304.781	331.145	376.389	381.221	281.956	386.428
band188	315.713	410.363	385.261	426.828	352.727	401.059	350.457	314.19	411.283	367.723	405.368	371.137	362.133	376.59	439.945	407.491	393.632	355.255	375.291	377.959	354.68	355.843	407.82	375.261	301.752	331.108	377.663	381.165	282.758	388.118
band189	317.656	414.925	385.219	423.705	356.393	402.466	351.463	315.714	402.853	366.041	403.474	374.442	362.18	378.288	444.27	411.333	396.088	356.22	376.426	382.509	353.976	356.34	410.65	376.492	306.383	335.008	380.052	382.519	286.124	390.094
band190	315.815	415.366	386.568	429.41	358.85	401.423	354.103	316.997	412.411	370.65	405.901	375.072	364.648	379.065	441	413.158	395.631	357.313	377.765	380.631	354.545	358.165	411.092	379.861	307.503	335.148	381.238	385.13	287.461	389.462
band191	317.921	415.353	387.255	427.964	355.723	403.605	354.895	316.829	415.402	370.793	407.985	378.546	361.313	378.435	441.74	415.703	395.707	361.432	380.144	377.328	360.118	358.914	410.425	378.081	310.043	337.869	381.239	383.493	289.861	390.8
band192	319.34	415.994	391.468	427.121	361.276	404.727	356.36	319.762	412.356	370.672	412.412	378.688	364.107	382.596	448.859	417.188	397.984	362.372	381.251	382.02	360.201	360.412	413.137	377.382	310.259	338.349	381.146	386.187	289.574	395.111
band193	327.027	425.3	392.687	430.356	363.085	406.712	359.408	323.959	417.402	374.418	418.542	383.261	369.7	384.331	446.244	418.176	401.111	365.675	385.667	388.812	360.609	361.997	417.123	382.167	313.977	343.638	386.638	388.477	294.028	395.363
band194	328.279	426.491	398.59	436.477	365.572	412.255	363.592	328.664	418.699	377.165	420.604	387.812	370.704	387.294	452.531	420.285	403.261	371.66	392.777	394.266	364.348	366.709	421.52	386.517	318.097	346.278	390.034	394.918	298.513	399.528
band195	330.729	426.85	401.187	435.628	369.022	413.802	363.438	329.466	420.931	381.715	420.82	393.307	374.002	390.051	455.887	421.206	407.896	373.359	393.942	395.532	369.336	371.517	422.957	387.472	322.687	346.645	393.268	395.196	301.267	401.911
band196	336.573	435.516	406.829	441.81	375.622	414.524	368.948	335.082	425.028	385.499	426.768	395.323	377.157	394.169	455.399	429.406	411.89	378.469	396.74	396.857	370.298	374.635	426.262	392.933	326.079	353.07	397.653	400.123	307.773	406.518
band197	341.233	437.216	409.845	439.177	376.657	419.353	371.33	337.715	427.168	384.097	433.056	401.947	383.463	396.797	464.633	432.121	416.591	382.777	397.928	405.754	379.796	379.257	431.31	395.377	327.56	355.53	399.237	399.969	307.547	410.774
band198	344.238	441.778	414.319	442.192	381.469	420.969	376.218	340.089	431.977	387.049	435.508	407.893	385.607	399.514	465.412	435.279	419.03	386.731	404.17	406.017	380.998	383.522	432.447	398.039	331.293	357.458	401.932	403.8	311.741	413.001
band199	349.114	440.128	418.803	445.303	384.161	424.906	378.305	345.355	436.071	393.022	439.146	413.218	385.533	400.197	467.199	442.545	421.123	392.101	412.067	413.706	383.332	385.223	435.533	400.074	333.631	360.627	404.949	406.787	316.004	417.699
band200	354.546	445.512	422.971	456.762	393.048	428.038	383.128	350.031	439.446	397.859	445.09	416.404	393.659	407.56	472.476	442.164	423.891	395.461	415.367	418.051	387.439	389.236	437.455	405.702	341.383	365.694	412.667	410.65	322.741	419.842
band201	361.653	451.722	431.603	455.718	396.304	433.427	386.442	356.088	445.103	402.837	451.09	420.068	394.8	412.674	476.576	448.897	432.526	402.837	421.691	424.857	393.699	399.015	443.553	409.644	346.008	371.062	416.162	415.428	328.058	426.352
band202	367.173	452.503	436.716	464.633	400.383	436.698	392.502	360.518	446.094	412.703	455.724	429.825	402.52	416.311	480.772	454.63	435.124	409.72	422.76	432.587	399.362	404.122	446.655	415.043	351.384	375.901	420.055	419.809	332.828	431.939
band203	375.975	466.278	447.394	469.462	409.05	442.747	399.047	367.53	456.439	417.62	470.954	436.075	407.389	426.054	489.141	459.261	442.333	418.315	434.328	440.782	404.663	411.61	452.812	420.447	357.763	381.926	429.436	429.39	340.362	438.76
band204	383.525	473.647	456.5	472.877	417.63	450.841	405.545	376.454	465.455	425.406	475.963	447.76	415.072	432.015	497.63	462.509	451.786	426.907	444.165	449.829	415.33	420.175	463.183	428.606	368.209	390.601	435.647	436.405	348.485	447.209
band205	392.003	480.75	465.777	483.323	425.875	457.666	418.13	384.823	472.968	435.085	486.015	457.963	422.528	440.407	506.453	476.388	457.844	438.378	448.912	459.427	423.13	426.392	468.28	436.003	376.173	398.973	446.327	442.678	357.456	454.597
band206	403.098	489.4	472.958	489.474	433.724	465.857	421.578	393.426	480.166	440.073	492.322	466.26	428.976	448.586	513.331	483.739	466.793	446.782	461.558	467.242	435.484	438.556	478.418	445.683	386.132	405.713	452.464	451.109	365.677	463.226
band207	410.872	497.497	485.452	499.005	442.122	471.72	433.293	402.02	493.92	448.968	505.523	478.649	436.567	455.651	523.27	490.606	474.354	455.692	471.872	479.246	438.566	445.427	486.012	451.002	395.513	414.892	460.551	459.071	374.573	470.963
band208	421.521	505.031	492.261	504.854	450.579	476.229	439.408	409.613	500.31	456.321	510.814	488.27	443.809	463.72	531.72	495.006	483.57	463.658	476.449	489.737	449.138	455.158	491.553	458.339	400.403	422.592	467.689	468.822	381.539	479.064
band209	429.372	510.934	503.145	513.9	457.875	482.61	446.58	418.364	506.878	462.09	521.737	494.154	451.265	472.205	537.228	511.861	492.006	472.889	486.781	495.212	454.426	462.675	498.945	464.309	409.973	428.798	475.574	472.533	390.911	486.75
band210	436.097	518.469	509.019	518.449	465.394	487.888	451.062	423.685	512.88	468.112	526.09	502.644	459.372	474.937	540.852	510.248	496.93	481.417	494.153	506.157	460.329	468.165	505.81	470.67	417.266	434.521	480.75	479.597	397.102	493.648
band211	444.359	528.256	517.458	525.079	470.076	493.999	458.402	432.992	519.283	478.29	535.557	512.4	464.815	483.464	548.701	521.788	503.974	490.206	502.488	513.29	468.465	477.047	511.312	477.458	423.862	442.025	488.846	486.598	406.503	501.931
band212	456.763	536.109	532.91	527.023	482.353	501.491	465.71	441.785	527.393	484.161	545.183	523.591	474.15	492.914	560.559	529.606	510.441	501.477	511.3	524.942	477.284	485.198	519.497	483.904	434.962	451.412	495.82	491.883	413.487	507.098
band213	467.846	545.384	543.877	536.251	488.478	508.977	473.897	448.975	537.179	493.652	555.164	534.3	480.572	502.894	564.576	535.661	521.991	509.867	522.049	534.065	489.149	495.525	525.303	492.994	443.735	456.892	504.119	499.553	424.238	518.557
band214	475.894	550.55	551.255	544.021	499.578	515.273	481.115	459.111	545.423	502.363	568.084	541.6	491.063	507.614	575.646	542.618	527.806	522.785	534.842	549.092	496.696	502.367	534.617	500.05	452.416	467.65	514.038	508.244	433.448	526.259
band215	483.12	563.653	563.194	549.174	505.726	522.666	490.735	466.026	554.037	508.574	578.461	557.144	499.507	517.815	583.836	561.194	538.465	533.6	545.312	562.642	505.536	510.908	543.47	505.066	460.145	474.545	519.527	515.779	442.132	536.072
band216	496.717	571.594	574.974	563.246	516.078	530.596	501.463	476.76	563.805	520.384	586.149	564.221	507.976	527.708	596.704	565.745	547.183	542.837	552.837	567.717	513.306	525.08	552.845	516.427	469.428	484.316	531.247	524.2	451.854	542.836
band217	505.166	578.347	585.016	571.487	525.402	538.217	510.057	485.993	572.715	526.457	596.755	577.342	518.148	535.861	600.087	574.4	555.606	554.894	562.54	578.898	525.642	533.172	558.68	524.344	479.488	492.048	538.282	537.611	460.022	554.708
band218	511.931	588.941	593.058	575.897	533.305	542.983	516.59	492.528	579.524	535.71	610.307	585.572	525.789	541.895	604.91	582.139	563.098	564.936	574.133	591.577	530.164	540.366	565.293	530.462	484.488	499.972	543.592	541.325	467.352	560.76
band219	522.009	598.944	601.971	584.705	539.666	554.006	522.927	501.656	590.032	541.545	613.991	596.151	532.285	549.913	618.521	587.63	569.528	572.379	581.93	599.563	539.896	545.082	575.798	537.209	494.447	506.22	551.668	546.896	476.863	568.559
band220	531.582	603.906	616.335	590.772	548.204	555.073	532.682	508.49	596.211	550.509	621.136	604.181	540.859	559.083	624.357	589.291	577.596	582.171	589.635	606.751	547.061	556.678	582.913	544.486	502.52	516.22	560.825	557.229	482.741	574.74
band221	537.444	607.609	620.387	597.308	555.393	560.848	536.285	516.384	603.322	556.71	630.232	612.777	546.32	562.877	629.997	598.097	584.633	590.393	596.902	617.119	553.01	563.425	585.32	549.544	509.806	520.295	566.202	562.969	490.061	581.619
band222	545.304	617.737	626.842	602.605	560.61	567.855	543.067	522.696	611.611	563.779	640.368	621.553	549.972	568.546	638.936	609.497	590.539	598.058	604.602	621.621	561.715	568.972	590.66	556.899	515.934	527.78	570.014	569.041	496.906	587.758
band223	553.305	623.547	638.326	607.6	566.896	572.101	545.208	528.56	615.08	569.642	649.994	630.684	555.278	575.05	642.669	613.564	597.694	605.19	612.751	633.137	568.806	576.609	599.055	560.238	522.037	532.647	578.353	573.324	505.921	593.706
band224	561.664	632.794	651.581	616.954	574.45	579.378	554.32	536.711	623.398	572.197	656.526	634.586	560.948	584.11	654.19	619.024	603.269	613.536	621.888	644.87	573.573	583.345	604.485	568.683	532.303	540.673	585.281	581.733	514.152	602.526
band225	565.919	637.959	655.3	620.846	581.059	582.257	559.952	542.193	630.49	583.049	660.932	646.616	568.209	587.137	655.772	626.576	609.173	620.307	626.312	650.13	581.958	589.622	607.725	573.065	532.112	543.616	591.918	584.448	518.589	602.734
band226	572.391	645.631	664.49	623.574	589.213	588.755	566.313	548.53	629.839	587.594	670.511	653.354	576.359	592.568	662.804	636.727	615.508	627.531	633.886	655.314	587.242	596.487	611.497	578.328	540.821	549.538	596.21	591.965	525.378	612.684
band227	578.732	648.141	671.084	632.082	597.251	596.427	569.45	556.52	639.664	592.937	672.35	656.582	580.339	602.49	669.514	633.958	619.881	636.023	636.416	660.556	594.612	601.97	622.02	583.34	545.521	557.617	602.267	597.155	532.302	617.93
band228	585.787	656.5	675.1	631.146	598.789	598.985	578.993	560.121	646.182	598.234	677.755	664.154	586.115	604.042	668.473	641.921	625.213	642.579	646.291	672.898	597.116	606.425	625.795	587.676	551.951	562.148	607.699	603.051	538.298	621.233
band229	588.821	661.225	681.661	640.428	605.443	599.845	582.452	565.449	647.11	600.572	686.474	673.57	590.859	608.896	682.54	647.57	629.593	648.04	650.049	677.785	604.073	612.181	628.367	590.846	556.862	566.345	609.838	606.891	541.224	626.894
band230	596.069	666.475	686.355	643.526	608.194	604.156	584.538	569.255	652.582	605.791	693.068	675.584	596.754	611.286	681.18	654.527	634.93	653.561	657.84	682.546	606.72	615.629	633.515	593.372	559.06	568.341	615.414	609.74	545.144	630.865
band231	602.762	667.806	689.984	642.818	613.161	607.763	591.222	572.421	655.209	610.341	691.861	680.233	597.754	614.086	683.264	657.073	637.643	655.8	659.233	687.812	614.327	619.92	634.475	597.928	565.098	572.438	619.751	612.396	550.752	632.56
band232	602.069	670.566	697.055	642.618	615.089	606.81	589.058	576.967	658.913	612.015	699.48	683.333	600.841	619.434	688.023	665.036	640.374	660.569	664.06	685.853	612.156	622.88	638.465	599.375	568.378	575.586	621.593	617.713	553.057	639.243
band233	604.834	673.203	700.655	648.113	614.5	608.444	593.037	578.652	661.434	612.669	706.759	683.256	604.807	621.77	689.045	660.909	641.619	663.577	661.874	694.072	615.901	626.677	635.482	601.462	569.318	577.716	622.381	615.868	556.156	639.69
band234	606.645	673.484	703.626	645.523	621.092	611.317	593.095	579.978	660.143	614.708	703.885	687.604	606.276	621.432	694.084	661.533	640.944	665.619	667.121	698.109	620.766	626.977	640.755	603.049	572.638	579.771	625.188	618.417	559.749	641.321
band235	610.788	672.216	703.232	647.967	620.963	613.534	594.097	583.311	660.08	620.418	702.746	689.23	604.937	620.985	696.778	662.152	644.455	668.234	669.388	696.894	620.54	626.734	644.73	606.276	574.017	579.849	628.047	623.906	562.273	640.604
band236	609.881	674.909	704.158	647.031	619.167	612.047	597.488	583.289	663.653	617.387	703.969	693.03	609.326	626.339	700.023	659.885	642.82	669.149	670.407	697.642	622.933	629.8	645.48	606.283	575.601	581.92	625.483	620.827	562.793	642.718
band237	614.293	672.309	710.316	647.197	624.481	613.329	597.342	586.213	662.561	616.041	709.83	692.177	604.257	626.105	694.325	662.733	646.609	672.047	675.737	699.672	624.533	632.33	641.735	605.045	577.391	581.25	627.517	621.518	564.692	644.308
band238	612.882	674.372	713.845	649.454	622.56	610.687	599.082	587.852	664.156	617.696	713.799	696.181	609.433	625.936	696.801	659.418	643.705	672.959	675.53	702.928	622.606	631.23	642.66	604.569	577.445	583.138	628.48	622.746	565.726	644.016
band239	614.336	677.234	713.894	649.074	623.479	610.832	599.055	586.54	665.343	620.494	707.359	691.604	613.015	622.312	699.502	662.727	644.745	672.179	675.228	701.147	622.178	632.394	641.5	605.869	579.953	585.598	628.079	623.448	567.28	643.903
band240	614.805	679.103	714.916	651.421	625.582	608.892	598.443	586.447	667.995	618.263	715.669	695.488	610.957	627.958	700.736	665.655	645.952	673.595	676.598	705.7	627.131	633.427	639.028	604.601	577.273	584.059	628.171	622.909	567.508	646.676
band241	618.205	681.156	714.235	647.559	628.538	614.146	601.123	588.136	662.756	621.708	713.82	694.993	610.602	627.44	702.81	664.57	646.287	674.89	675.133	701.587	628.33	632.908	643.74	608.464	581.1	587.101	630.53	623.071	571.356	646.706
band242	617.77	676.1	719.481	651.446	628.438	614.425	600.977	590.571	665.991	618.29	718.851	700.826	608.796	627.547	702.048	669.503	647.967	677.999	677.235	706.253	628.792	633.921	643.077	607.902	581.913	587.714	632.608	623.449	573.247	646.919
band243	617.552	678.581	717.019	645.556	626.013	611.562	602.16	590.232	664.802	622.46	720.226	696.747	611.367	629.043	705.955	667.57	647.165	676.168	678.867	704.741	627.799	634.398	639.83	608.679	583.095	586.856	631.208	623.878	570.304	649.252
band244	619.491	674.741	719.084	649.282	626.026	609.074	599.31	591.175	660.651	619.28	720.861	698.084	613.174	629.634	703.158	667.685	646.051	677.202	677.428	705.969	630.045	634.086	638.765	606.491	580.968	583.995	628.431	620.344	571.055	645.864
band245	616.652	674.109	719.261	641.105	626.111	608.514	597.598	589.362	662.094	618.331	716.808	697.867	609.407	625.618	693.158	669.255	644.967	678.35	677.433	709.15	623.708	629.134	637.178	604.372	578.405	585.004	626.056	620.909	569.067	644.648
band246	616.605	672.003	715.923	648.608	622.691	606.5	597.705	588.416	653.671	615.428	711.576	696.689	608.437	624.835	695.212	662.8	641.186	675.691	675.674	707.802	624.227	630.133	639.305	605.153	578.8	583.663	626.071	619.917	570.229	637.872
band247	611.738	672.234	715.961	640.874	619.441	602.025	593.052	584.91	655.248	613.535	712.093	689.502	610.365	621.047	698.955	659.552	641.795	671.647	672.858	700.628	623.301	628.844	629.9	599.656	575.44	580.12	622.939	615.958	567.518	639.173
band248	610.397	667.244	709.574	637.731	616.503	597.81	590.882	582.951	653.251	611.827	708.523	691.237	602.989	621.396	692.01	660.885	638.289	670.981	670.344	703.3	619.732	627.195	629.675	597.088	573.257	578.182	619.433	613.827	566.244	637.236
band249	607.081	666.778	705.487	634.128	616.837	595.945	591.263	580.668	648.71	610.591	704.505	688.658	598.517	611.934	684.003	651.873	633.509	668.856	667.498	699.369	614.548	621.906	626.808	593.01	570.856	575.892	616.9	612.14	562.74	633.411
band250	605.779	658.734	704.332	634.656	613.597	592.778	586.567	578.241	647.552	606.973	704.009	684.818	600.65	615.949	686.322	651.679	630.85	664.593	660.298	696.14	616.5	621.558	625.35	592.89	569.687	574.151	613.824	608.521	563.627	630.476
band251	603.937	659.444	700.216	632.105	610.617	592.643	585.677	577.064	648.738	602.937	702.297	683.351	597.415	613.668	685.617	649.339	628.878	664.448	662.27	692.935	610.991	618.327	623.612	590.66	568.419	573.992	614.954	605.592	560.827	628.838
band252	605.795	657.678	699.21	628.544	609.248	589.052	584.892	576.395	642.248	600.509	700.994	685.77	597.135	610.097	683.865	643.218	628.946	664.343	659.544	693.584	614.718	617.099	621.095	589.002	569.37	572.103	611.766	607.329	559.404	626.37
band253	603.415	653.553	699.794	624.9	610.924	590.021	584.925	577.221	639.818	601.611	698.009	684.421	596.274	608.619	681.254	647	628.139	663.952	663.616	693.918	608.1	615.67	624.217	588.992	568.91	572.051	611.568	604.399	560.301	624.287
band254	600.365	653.659	695.461	626.892	609.148	588.553	585.405	576.702	637.759	604.165	694.78	679.005	598.052	611.457	679.341	643.679	625.902	661.916	665.728	692.423	613.175	616.293	620.053	585.672	568.836	570.799	608.427	606.684	560.279	624.971
band255	602.101	652.35	698.997	624.069	604.865	586.035	579.998	574.457	641.069	601.044	699.316	675.926	592.441	609.413	683.347	648.145	624.167	658.812	658.121	688.485	610.183	616.257	616.71	585.572	565.635	569.527	608.221	602.506	557.344	624.198
band256	600.878	652.069	697.165	618.577	604.142	583.773	580.515	570.998	638.294	598.474	689.858	675.06	591.163	606.303	674.537	637.697	621.458	657.914	659.572	684.925	608.035	611.906	614.66	583.674	564.314	567.302	604.538	598.459	557.892	619.42
band257	598.318	647.647	693.277	617.959	602.981	583.545	578.305	572.501	633.809	591.832	693.325	676.847	593.183	607.043	671.91	643.824	620.556	655.23	654.83	682.771	610.028	613.374	618.117	579.674	563.425	566.475	604.129	598.915	557.11	619.791
band258	595.986	649.663	694.013	616.972	599.375	578.846	572.728	570.413	632.738	591.893	688.35	670.649	589.522	603.87	668.122	635.509	618.689	654.655	651.214	681.116	607.24	610.082	609.805	579.17	558.372	564.53	602.987	593.89	553.416	616.745
band259	592.42	641.872	687.484	610.764	595.724	575.953	572.77	564.855	626.487	591.567	685.316	668.982	584.891	598.311	666.376	633.067	614.861	650.997	650.84	675.956	602.813	605.324	609.283	574.516	557.851	560.217	598.039	592.075	551.906	612.968
band260	588.158	637.359	680.3	604.915	594.257	570.899	570.603	563.223	622.136	587.392	678.031	669.375	580.026	596.145	666.17	631.073	609.926	649.093	644.277	677.109	596.68	600.886	604.072	571.915	557.251	556.558	594.408	589.469	550.515	610.074
band261	584.194	629.938	674.158	603.408	590.688	569.052	567.138	560.536	621.138	581.696	674.164	664.53	581.443	591.671	659.064	628.109	606.526	643.105	640.17	672.167	594.265	596.092	599.548	569.952	553.556	554.182	590.98	583.919	546.432	603.795
band262	583.836	630.259	678.458	603.023	588.522	566.408	564.3	556.171	616.322	577.796	675.622	656.246	577.957	589.721	652.058	616.594	602.72	640.824	640.749	666.73	591.63	595.926	594.442	566.901	547.924	551.754	587.592	579.165	542.18	600.76
band263	582.487	627.347	667.697	600.321	586.636	563.671	559.668	555.317	614.483	577.774	670.108	653.36	574.97	587.49	652.961	619.8	600.788	635.99	635.663	665.273	590.555	592.878	596.612	562.379	547.076	550.759	586.186	578.906	541.776	600.456
band264	579.66	630.231	662.884	596.931	584.563	558.301	556.86	551.854	612.071	570.983	664.879	652.151	571.272	580.036	649.778	618.515	595.109	634.633	630.502	660.352	586.618	586.841	587.97	559.55	545.107	545.799	580.487	574.529	536.562	593.462
band265	574.205	619.066	663.087	589.282	579.447	556.703	554.208	547.695	604.901	567.083	661.619	641.633	567.489	580.712	644.73	615.782	592.064	629.243	624.979	654.642	582.427	585.178	583.462	554.614	540.019	542.264	575.864	571.266	535.735	593.793
band266	574.073	618.394	661.355	592.413	575.196	553.133	551.202	546.666	604.609	562.968	659.152	640.837	566.537	577.881	640.251	614.927	590.593	626.009	619.926	653.519	579.036	581.503	582.452	554.017	539.134	541.817	573.956	569.342	534.429	589.471
band267	572.987	615.913	655.455	585.569	573.985	549.578	547.858	543.486	600.869	565.117	656.867	641.395	563.335	576.829	634.26	608.794	589.902	625.452	622.191	650.771	578.939	579.499	581.102	551.201	534.696	538.315	572.847	566.553	532.263	588.422
band268	571.572	610.491	657.887	585.241	571.971	549.353	544.962	543.514	598.593	561.944	656.201	640.233	559.913	572.977	637.315	606.721	587.568	621.778	622.267	647.744	579.344	581.173	581.352	549.388	535.271	537.193	570.895	566.78	529.664	583.962
band269	566.084	611.116	653.884	582.592	571.301	548.66	544.898	541.905	594.464	563.075	655.111	637.918	559.393	569.98	635.743	601.545	582.011	619.799	621.019	647.195	573.958	576.485	575.222	547.168	533.983	536.262	569.359	560.104	527.433	580.962
band270	567.144	603.728	650.21	573.772	568.111	541.759	540.822	538.397	593.166	556.197	654.384	639.556	557.811	570.352	632.37	602.988	581.591	619.129	616.556	644.044	572.415	572.456	575.595	544.434	530.052	533.05	567.666	563.764	526.799	582.396
band271	562.099	603.112	646.977	575.151	563.028	539.348	542.128	536.024	589.924	555.182	637.994	632.005	552.77	566.981	626.106	594.733	579.153	613.036	613.6	640.631	565.581	568.992	570.725	541.406	528.413	530.911	561.541	557.616	524.12	575.71
band272	558.831	598.184	642.361	570.372	562.776	536.466	536.253	533.49	584.055	550.158	638.644	632.239	552.659	561.697	623.685	591.521	574.075	611.836	608.905	639.126	565.443	563.737	567.415	537.96	526.24	526.911	560.132	555.031	520.141	569.635
band273	555.444	599.778	633.49	564.403	556.248	533.241	532.385	528.056	582.611	544.762	632.997	623.039	546.172	557.459	619.72	589.97	568.386	605.651	605.328	629.901	562.163	560.013	561.977	533.373	520.109	521.59	553.105	548.337	515.277	567.414
band274	546.267	585.556	630.413	563.21	553.128	527.182	528.332	523.918	574.402	543.299	628.381	618.614	539.037	553.036	610.904	579.485	566.237	600.83	601.216	625.345	554.997	558.393	553.497	529.003	515.699	519.131	550.008	544.678	513.042	565.148
band275	544.863	582.922	630.21	555.915	548.938	522.336	524.397	519.348	567.067	537.263	625.402	614.695	538.228	548.789	608.99	580.17	558.81	595.746	594.428	619.894	554.597	550.009	551.018	525.225	512.279	516.515	546.169	536.93	508.626	555.848
band276	543.51	581.691	625.339	552.623	543.145	518.758	517.685	515.08	564.883	531.307	617.697	608.986	535.72	542.629	603.611	573.921	554.623	593.368	590.556	615.433	548.424	546.61	544.663	519.774	505.85	508.184	540.474	534.337	504.068	550.649
band277	536.973	575.513	619.813	549.351	539.543	516.931	514.495	512.887	564.471	529.832	613.087	604.314	531.152	539.069	601.598	571.218	551.78	587.512	586.933	610.901	544.837	544.12	543.558	516.91	504.302	506.454	538.112	532.704	500.832	548.618
band278	535.179	571.362	615.765	540.941	535.891	512.362	512.013	507.612	559.278	521.075	609.356	602.825	526.741	537.152	598.598	568.406	548.08	582.746	583.688	609.01	541.348	539.96	540.053	511.417	499.591	500.657	531.198	526.332	496.629	545.862
band279	529.911	565.016	611.519	540.718	528.796	511.053	510.035	505.807	558.147	521.392	609.495	594.291	522.513	533.572	591.508	563.909	544.013	579.61	576.565	603.706	538.171	537.263	535.533	509.777	498.653	499.026	527.347	523.622	492.601	542.611
band280	526.538	563.356	606.639	538.254	528.475	507.403	503.878	500.846	547.506	513.946	606.824	593.677	522.333	528.668	592.373	553.788	540.496	577.05	572.116	597.846	535.112	532.104	530.19	505.377	494.105	494.339	524.117	518.836	490.453	538.543
band281	523.238	556.375	606.09	530.436	526.862	508.589	504.925	500.882	548.701	513.635	604.492	591.207	515.946	527.881	584.637	549.242	537.059	574.568	572.842	595.362	527.697	530.231	530.505	503.419	492.899	494.181	524.086	520.915	488.919	537.986
band282	521.793	559.703	602.497	526.836	523.611	507.946	501.64	497.693	542.834	510.141	598.207	585.123	516.811	523.523	582.72	551.824	535.187	567.917	566.221	594.471	530.106	525.172	527.288	500.507	490.715	492.758	520.754	514.676	487.151	532.374
band283	515.965	553.744	600.442	530.285	519.481	510.803	502.482	495.255	540.947	510.552	597.461	584.579	511.504	519.717	582.846	549.461	530.686	566.369	565.856	589.768	525.751	524.09	528.058	500.418	490.925	495.117	518.774	515.494	485.127	529.43
band284	513.774	551.231	597.026	526.195	517.927	509.936	499.282	493.811	539.382	510.209	591.511	579.319	508.522	520.457	579.392	552.848	526.892	564.552	563.67	586.403	523.427	521.827	527.87	501.24	490.635	493.212	518.627	516.205	483.914	528.727
band285	510.59	543.803	594.445	528.792	515.397	511.275	500.057	494.518	531.372	506.117	588.139	573.389	502.246	514.476	578.945	544.764	522.907	558.47	558.123	583.13	517.73	517.674	526.092	497.797	486.644	491.604	515.304	512.785	482.605	523.58
band286	502.373	543.569	587.871	525.297	513.402	513.745	501.715	493.789	530.97	508.019	582.916	571.47	501.441	510.503	568.074	536.315	521.225	555.583	552.451	575.451	515.467	513.894	528.077	498.209	491.543	493.341	514.055	519.222	482.063	519.294
band287	505.425	540.938	586.139	522.833	512.262	513.636	504.723	492.178	524.232	506.324	579.437	564.691	495.683	508.279	562.83	531.545	516.966	549.507	548.493	572.549	512.081	509.968	528.315	498.867	491.27	494.917	513.109	518.292	483.46	515.188
band288	504.423	533.969	578.274	522.254	513.545	513.59	502.317	492.289	522.06	509.723	572.232	559.293	491.72	505.588	559.91	529.073	513.839	545.627	542.088	563.536	510.631	506.888	528.16	500.296	490.572	496.362	513.517	515.116	483.324	512.704
band289	504.243	530.062	570.258	525.987	515.289	517.71	510.408	495.285	516.343	511.586	569.687	555.391	487.63	502.26	557.749	521.552	509.993	541.496	539.33	563.703	508.766	504.025	533.09	503.295	492.832	499.811	516.895	519.565	486.861	509.956
band290	508.775	530.237	568.326	533.182	517.714	518.792	502.84	497.87	513.522	512.616	561.991	552.967	484.709	503.215	550.473	520.309	512.297	534.917	536.349	556.874	513.478	502.117	534.61	503.094	494.738	499.531	519.73	520.876	487.556	511.771
band291	508.957	531.434	564.155	531.956	517.497	520.892	510.315	498.995	518.03	515.818	561.495	545.805	485.17	502.339	543.794	525.2	512.51	532.179	527.093	552.034	509.413	503.224	535.258	505.928	497.876	500.882	520.892	520.812	488.557	510.296
band292	511.435	531.634	557.123	526.631	517.35	520.781	509.328	499.354	518.568	510.47	552.059	545.746	484.735	507.435	538.36	529.091	515.056	529.304	527.988	551.512	518.756	506.308	530.148	502.712	493.043	499.974	518.771	519.601	488.154	513.379
band293	510.442	530.712	550.087	527.123	522.691	520.897	511.703	502.128	520.517	518.479	546.941	544.923	489.828	505.903	536.855	528.624	512.579	527.516	528.437	551.174	511.426	504.478	536.013	507.718	495.87	503.346	522.565	523.479	490.813	514.283
band294	511.7	530.797	554.381	532.677	521.475	522.333	513.808	501.515	524.706	514.075	551.031	545.36	488.193	507.023	541.138	527.127	517.322	528.168	530.286	553.038	515.407	510.178	536.75	506.321	499.03	505.759	523.949	521.159	492.336	513.992
band295	514.745	538.184	551.09	536.121	523.87	522.265	513.185	502.715	522.855	519.158	545.025	542.023	492.604	506.586	535.949	536.412	517.623	528.634	530.847	550.918	520.365	512.113	537.722	509.534	501.559	508.241	523.627	527.957	494.011	516.551
band296	516.678	540.075	554.097	536.782	522.541	524.431	515.985	504.125	525.324	522.041	543.706	546.225	492.707	507.363	535.222	535.655	519.018	528.161	532.023	553.7	520.675	511.542	543.56	512.721	501.54	507.619	525.553	527.461	494.2	517.999
band297	516.661	533.569	554.761	535.346	527.946	525.662	516.482	507.346	522.864	521.136	543.378	546.995	494.5	513.37	537.9	530.273	519.489	531.52	532.933	557.884	524.111	513.19	541.385	512.144	501.231	506.895	526.691	528.879	496.084	518.141
band298	516.486	535.041	555.99	540.256	527.321	526.813	519.243	507.807	521.398	524.786	544.176	549.268	494.585	515.23	537.781	535.018	522.473	530.476	536.286	557.816	524.458	514.192	547.452	514.665	504.181	512.015	529.373	533.228	497.109	521.744
band299	521.327	534.094	558.158	540.431	531.623	530.034	522.257	511.179	523.867	533.328	549.514	550.56	496.8	511.09	534.01	535.794	522.132	534.64	533.9	557.42	525.422	513.207	549.76	518.239	506.143	515.853	531.725	533.498	500.659	519.014
band300	523.226	539.478	557.748	541.662	530.375	528.636	521.512	510.005	526.68	525.628	547.737	549.658	496.787	516.372	541.032	536.521	522.578	537.967	535.081	559.362	529.045	514.595	543.783	514.535	505.977	512.418	531.595	534.669	500.807	523.422
band301	521.22	542.522	559.052	543.533	527.453	530.336	522.948	511.739	528.322	525.307	545.703	551.872	496.785	515.852	539.222	539.655	526.32	535.43	537.277	561.273	523.484	517.734	546.945	519.371	509.662	514.673	535.238	536.633	503.311	523.936
band302	524.668	543.763	560.158	542.795	533.865	531.892	524.312	513.134	530.894	522.762	557.52	555.928	496.811	516.636	537.727	543.479	524.627	539.055	540.479	564.273	528.779	516.583	547.415	517.282	510.808	513.552	534.416	535.33	504.642	522.601
band303	523.346	546.888	564.723	546.331	533.416	532.953	518.44	514.426	532.182	526.204	552.319	553.279	504.741	518.098	542.74	545.388	524.841	537.968	540.547	567.256	526.178	518.328	543.477	518.034	510.354	515.502	536.002	535.041	503.677	522.549
band304	526.885	549.487	560.703	548.428	534.394	532.153	524.342	516.23	536.428	533.45	553.613	561.425	500.052	521.243	543.389	549.37	530.681	541.692	542.863	567.072	531.282	522.283	554.535	520.254	512.809	519.147	536.243	540.039	504.377	526.543
band305	528.993	544.431	565.771	545.531	540	539.179	527.362	519.036	537.264	532.628	554.768	556.675	500.543	523.68	547.37	543.818	530.804	544.091	545.002	569.679	531.28	520.15	548.86	522.356	513.59	521.062	540.995	541.502	508.008	528.812
band306	530.365	547.803	569.026	549.495	541.585	537.578	525.898	517.69	531.497	533.873	556.455	559.868	505.272	524.203	545.595	548.945	529.97	544.261	546.612	569.471	536.567	523.524	553.27	522.247	517.562	521.343	537.159	539.467	509.055	530.268
band307	534.173	547.769	566.068	551.003	540.242	535.994	529.743	518.859	537.791	535.805	558.012	561.368	504.472	525.393	551.749	545.345	533.014	545.283	547.293	567.689	535.31	525.29	557.34	522.704	516.165	521.068	541.038	542.233	510.331	532.245
band308	532.98	549.991	564.042	551.638	545.015	541.813	531.773	523.193	537.938	535.968	557.585	562.279	505.667	525.335	549.814	549.461	532.965	546.557	545.367	569.481	535.465	524.563	551.28	525.485	517.199	524.435	543.714	546.316	511.794	530.29
band309	535.06	547.647	565.706	555.113	540.674	538.882	537.16	523.61	534.899	536.954	560.053	561.975	507.298	525.719	551.177	542.8	531.807	546.669	548.009	571.044	542.503	523.848	557.428	527.567	520.275	527.007	545.217	546.645	513.722	532.667
band310	535.55	550.647	569.913	554.482	544.279	539.548	530.54	523.292	541.784	537.173	564.641	566.593	509.361	530.935	551.743	549.806	535.007	548.561	551.095	575.413	537.792	528.799	553.678	528.3	519.744	523.924	542.479	546.239	512.533	533.589
band311	538.195	555.112	569.658	553.749	545.361	539.915	534.222	523.994	539.798	536.241	560.526	568.318	506.53	525.1	549.582	555.673	536.047	549.774	549.577	576.928	539.794	527.367	554.82	526.112	520.138	525.54	542.863	549.409	515.251	535.262
band312	541.208	559.816	576.406	555.674	547.455	544.029	538.243	528.96	541.161	541.068	561.947	564.144	513.237	528.902	549.871	551.388	537.006	549.026	553.184	573.181	541.237	530.459	560.543	530.565	522.331	530.498	547.029	551.207	518.71	533.973
band313	539.267	550.122	571.9	556.374	548.845	544.339	537.1	528.146	535.382	539.071	563.034	565.484	511.757	528.818	554.145	547.945	535.465	550.016	555.212	574.369	541.687	528.202	560.405	532.875	524.205	530.666	546.82	548.745	517.288	535.481
band314	542.658	554.362	575.855	559.662	545.704	541.304	536.545	528.669	546.963	540.384	567.573	571.372	514.057	529.665	554.717	554.776	538.959	551.614	555.742	580.679	541.858	530.603	557.67	530.649	523.718	527.868	545.472	551.048	517.908	537.65
band315	541.342	553.191	578.713	559.223	550.463	542.012	537.893	527.972	539.453	544.401	570.582	568.033	514.424	530.774	556.624	547.576	540.393	554.142	553.158	575.215	543.202	529.119	556.663	532.746	525.837	532.895	547.908	551.325	520.673	536.389
band316	546.302	554.966	577.687	551.421	547.862	543.447	538.132	528.691	542.579	540.873	566.771	564.2	514.507	534.399	551.238	561.491	543.678	552.643	554.756	577.348	547.204	533.123	561.523	531.083	526.016	530.565	547.122	550.749	518.983	539.304
band317	544.466	556.222	577.8	556.438	550.029	548.036	538.252	529.392	543.968	541.908	566.542	575.761	513.661	533.501	559.904	558.77	542.625	557.516	559.565	578.048	542.657	534.6	561.283	532.137	528.169	531.103	550.053	552.674	519.766	542.692
band318	545.088	562.781	575.955	556.967	547.959	544.636	536.392	529.985	546.598	540.406	571.015	575.414	517.337	535.55	557.151	561.261	540.343	556.255	554.849	583.57	545.6	536.733	560.758	533.348	525.409	531.523	548.954	552.4	522.642	542.778
band319	548.102	558.388	578.945	566.408	549.387	549.533	540.963	535.229	547.384	548.54	568.322	573.598	518.241	538.283	560.936	554.782	544.321	558.107	558.302	586.28	551.284	534.443	569.903	537.095	531.818	535.886	550.477	553.679	525.257	543.854
band320	548.545	560.478	584.923	561.131	555.111	550.697	545.765	535.617	549.943	549.321	572.04	575.089	520.42	537.416	560.785	557.752	543.787	557.487	556.886	585.826	548.732	535.662	564.16	538.077	534.519	539.022	553.983	559.378	527.578	539.549
band321	551.276	564.116	586.09	561.359	556.664	549.444	542.003	535.168	552.044	547.192	572.04	575.033	519.576	541.289	562.331	569.248	544.362	558.153	560.495	584.935	548.567	538.835	561.867	537.185	532.464	535.281	554.411	554.019	527.949	544.305
band322	551.01	556.966	586.242	564.538	555.642	549.631	546.528	536.692	547.209	551.443	571.954	578.288	518.454	536.44	559.174	558.582	543.503	560.063	560.742	583.355	550.907	535.987	563.903	538.236	535.096	538.662	554.298	554.979	526.878	537.908
band323	549.58	567.85	584.126	568.638	559.488	551.096	545.202	539.335	556.991	544.62	574.867	579.528	518.73	540.821	563.45	572.594	549.77	563.264	559.198	587.727	552.178	540.883	561.288	542.155	532.66	537.5	554.944	557.633	529.977	548.319
band324	557.469	565.344	583.8	563.862	564.912	553.322	551.755	541.855	554.811	551.589	573.724	585.225	518.174	541.591	565.058	570.97	548.551	565.237	558.74	596.973	556.931	541.079	569.27	540.588	536.483	541.234	556.312	561.949	534.641	547.769
band325	558.404	567.956	588.445	566.315	562.403	553.83	552.777	541.72	556.805	551.844	581.461	581.593	526.298	543.643	560.328	570.564	550.751	564.426	562.44	588.758	553.228	545.151	566.025	542.968	540.601	541.018	558.724	563.978	534.296	549.764
band326	557.116	566.166	587.868	567.092	560.233	555.775	553.482	542.909	549.126	553.187	574.845	582.256	523	542.692	565.18	572.703	550.869	565.48	568.547	589.631	557.486	539.374	571.735	541.784	541.09	543.124	556.623	559.426	535.958	548.821
band327	558.661	569.709	587.384	565.941	561.337	558.536	546.042	542.965	554.577	549.127	579.687	584.361	525.285	541.196	568.322	568.333	550.046	565.936	568.342	597.72	553.649	543.251	569.845	542.801	537.008	541.711	556.922	563.961	535.543	548.561
band328	556.139	567.656	596.094	569.503	566.661	557.837	551.202	544.544	550.43	561.842	584.025	584.895	525.791	542.031	561.479	569.758	548.793	566.885	569.323	591.379	553.945	543.635	574.653	547.788	545.341	549.414	559.28	570.051	536.615	546.334
band329	555.048	570.837	589.332	572.751	559.782	557.146	552.262	543.541	560.26	559.854	578.786	585.179	527.143	545.52	572.598	564.945	549.674	571.041	573.891	596.113	558.896	546.973	570.465	545.843	542.286	544.409	558.867	566.077	536.398	548.163
band330	560.881	568.609	594.1	574.587	563.035	557.646	559.417	544.87	555.94	559.061	582.598	586.282	529.554	545.881	568.148	572.394	551.455	569.562	571.026	593.56	559.012	544.477	573.32	545.423	547.922	547.342	560.228	567.239	539.698	549.343
band331	564.99	575.431	599.526	576.644	567.396	558.185	555.73	545.462	567.625	556.9	583.056	585.411	533.776	548.318	566.698	583.576	554.058	570.759	572.7	595.304	560.763	552.166	577.52	548.741	544.271	547.848	563.73	567.849	541.785	558.191
band332	561.195	573.191	597.394	568.685	562.367	561.809	561.873	550.104	555.078	561.029	586.006	586.688	530.265	546.299	572.83	575.782	553.654	570.787	573.235	606.894	556.265	547.857	575.195	544.991	544.907	548.796	562.408	569.267	542.455	550.688
band333	571.33	573.753	590.613	577.867	569.004	561.05	556.482	551.002	560.453	564.117	579.554	589.053	527.022	547.174	572.026	570.079	554.865	571.371	573.96	596.427	565.974	548.345	578.62	549.306	547.917	550.466	568.758	566.628	543.782	556.731
band334	567.677	575.925	598.403	573.567	569.101	563.101	557.048	549.8	560.4	563.141	584.003	595.389	534.617	556.5	572.029	573.673	557.614	576.81	576.049	595.734	566.718	551.396	574.268	546.6	549.495	552.103	566.293	568.827	542.399	561.916
band335	564.284	573.684	597.935	579.492	571.852	568.735	559.677	553.31	558.915	562.389	583.991	590.744	535.083	550.988	574.936	568.697	556.785	575.402	573.881	597.915	563.957	553.965	580.86	553.047	551.446	555.17	571.489	574.698	545.554	554.713
band336	568.152	582.997	599.668	584.167	576.999	562.217	564.392	556.142	562.867	569.628	590.022	597.091	530.122	549.451	573.026	576.291	557.943	574.773	578.795	604.788	565.311	551.577	585.962	550.289	554.987	555.895	573.44	580.447	549.971	557.437
band337	574.056	580.35	601.158	580.264	575.408	564.438	563.497	554.429	564.623	561.445	591.74	603.002	534.52	551.614	575.453	567.539	560.801	580.563	588.907	609.01	568.336	551.973	579.433	552.462	550.615	555.703	569.531	573.936	548.304	559.516
band338	575.876	584.462	607.29	584.144	575.974	567.873	561.142	558.864	567.975	569.26	597.043	594.735	530.678	557.366	581.096	585.315	562.556	577.97	583.93	605.631	572.785	557.348	581.81	555.515	554.759	556.924	569.85	574.816	548.273	563.215
band339	574.796	583.975	608.439	578.421	577.482	570.325	564.165	558.327	573.248	562.796	593.232	601.632	536.474	560.803	581.865	576.703	564.661	575.978	574.04	602.382	571.888	558.93	584.857	552.928	554.03	555.27	570.75	577.058	550.32	562.084
band340	569.289	585.747	605.132	588.354	583.299	562.669	561.722	560.187	570.515	570.1	588.384	600.325	534.772	558.361	578.408	570.182	565.6	583.258	588.44	602.205	572.46	557.794	584.03	557.225	557.167	555.404	576.657	578.143	554.836	563.86
band341	578.19	589.116	605.942	584.936	580.147	567.303	571.622	559.761	574.007	572.905	597.52	601.391	540.293	559.09	576.765	578.606	565.446	585.756	583.516	604.812	575.559	559.708	584.135	558.553	555.614	560.144	572.975	581.043	553.618	566.139
band342	583.501	587.987	614.045	581.918	582.518	576.108	572.018	565.61	574.326	571.484	598.536	599.112	539.774	562.049	585.145	573.782	569.253	584.017	588.037	604.174	580.593	562.09	596.553	562.386	567.738	565.463	580.517	585.601	557.86	565.233
band343	581.325	588.163	607.468	591.674	585.933	573.311	577.975	566.3	569.517	575.854	603.786	601.042	544.328	565.469	586.836	578.642	570.997	585.594	591.26	607.232	578.327	562.61	587.327	563.748	564.338	560.615	581.17	584.993	559.98	569.8
band344	573.601	585.663	609.019	587.069	585.019	571.738	570.632	562.623	577.724	566.749	598.022	603.211	546.102	559.799	588.235	578.267	565.295	585.952	590.119	609.13	580.007	559.326	584.597	562.206	560.687	562.124	579.79	577.903	559.602	564.437
band345	579.065	591.05	619.787	582.231	584.567	569.358	570.075	564.336	572.166	571.448	596.099	612.67	541.448	566.324	585.167	586.964	569.592	589.919	594.498	613.72	576.804	568.725	584.275	564.077	558.889	561.843	578.479	584.31	555.383	570.982
band346	589.935	595.097	619.697	586.646	586.406	569.639	577.337	567.062	577.69	573.455	599.495	610.895	546.804	572.146	593.09	585.303	573.932	590.276	593.514	625.877	581.412	570.118	588.965	564.119	562.197	564.985	582.127	584.723	563.648	575.954
band347	580.885	592.766	617.897	589.159	585.37	572.796	570.23	567.365	575.678	575.611	594.731	609.13	549.054	563.575	592.492	588.685	566.217	594.092	593.153	615.365	579.469	563.948	594.84	562.574	564.559	563.913	580.401	583.891	559.828	566.736
band348	582.406	589.534	611.926	590.959	588.823	577.569	578.45	571.339	576.14	576.384	609.69	608.289	552.733	570.577	592.781	588.521	571.989	588.643	587.653	608.491	579.637	572.885	594.962	567.182	566.964	570.689	583.622	589.095	565.984	571.383
band349	588.866	595.834	617.123	588.341	587.043	579.705	576.347	566.891	574.628	570.146	605.551	606.605	548.822	570.06	592.122	589.618	574.386	596.449	593.798	615.195	588.405	572.131	595.742	566.496	570.992	571.804	582.249	586.819	561.308	575.445
band350	591.122	586.225	618.884	583.208	593.68	579.701	581.563	573.986	579.759	573.29	615.52	615.107	553.954	568.687	597.653	596.842	572.652	596.892	601.079	625.765	589.301	572.775	591.298	571.285	566.563	572.183	582.85	586.006	566.931	577.165
band351	592.628	605.181	619.265	595.633	595.761	579.948	575.997	573.577	590.467	584.487	611.814	611.47	552.191	574.855	595.209	596.758	578.446	596.643	595.423	623.048	585.26	568.444	595.207	569.763	574.177	573.752	585.308	589.842	567.948	570.897
band352	593.398	593.678	625.748	590.967	595.196	577.855	579.287	573.964	593.777	577.747	609.35	621.182	553.078	574.107	589.543	589.6	576.861	599.468	604.195	619.908	589.069	566.731	594.697	572.43	573.49	574.5	584.729	587.728	568.574	569.646
band353	591.338	597.984	628.061	592.979	598.051	579.999	583.055	573.617	585.011	578.051	607.062	614.351	556.693	572.254	595.376	589.794	579.406	598.359	600.384	621.782	585.026	568.803	592.893	567.23	572.041	573.777	589.226	585.96	567.088	572.495
band354	597.991	598.237	627.4	598.882	600.677	579.746	578.518	579.336	584.237	591.47	616.285	625.035	557.95	579.026	594.302	594.345	581.773	604.265	602.456	627.696	589.606	572.258	598.155	574.78	575.881	576.811	588.277	597.606	572.561	580.971
band355	603.923	608.075	630.465	601.354	596.079	583.817	588.258	576.773	595.885	585.71	620.235	621.118	555.239	585.013	594.778	605.691	583.07	601.71	601.958	623.072	597.138	582.367	597.645	572.874	584.039	580.323	594.242	594.112	577.675	583.234
band356	603.397	606.791	627.2	602.41	599.397	584.815	589.167	578.66	590.237	586.82	611.282	622.065	562.728	582.026	600.531	599.715	587.625	604.329	607.081	628.235	589.962	579.092	601.005	575.818	575.429	579.83	589.408	595.072	571.463	581.727
band357	591.309	602.319	638.003	602.349	596.99	586.206	598.782	583.583	586.915	592.771	621.288	618.174	561.676	576.279	602.563	588.261	583.722	603.524	606.635	631.676	592.773	579.25	603.577	583.431	580.331	583.7	594.953	601.688	580.639	578.863
band358	596.068	604.438	635.174	604.408	603.718	583.597	586.567	578.955	592.005	589.092	627.966	618.439	566.393	584.542	602.797	609.988	584.799	604.184	604.693	619.215	588.431	577.479	604.755	580.616	580.782	580.23	594.67	598.071	580.194	583.3
band359	604.37	602.206	637.768	614.564	608.293	586.178	592.083	588.977	587.807	595.197	618.214	622.804	561.937	584.809	605.151	598.406	586.253	607.728	611.979	630.423	601.855	583.657	610.278	587.033	589.328	588.913	602.547	607.849	584.957	586.942
band360	595.988	602.366	635.194	597.79	606.46	592.793	598.042	585.419	593.591	594.569	619.241	630.728	561.057	588.559	601.859	593.03	587.353	610.681	613.005	633.218	594.003	585.935	605.6	581.727	579.31	592.192	601.92	601.234	581.991	586.994
band361	600.607	608.728	640.681	603.5	603.545	591.706	593.615	586.156	597.349	590.91	624.932	628.433	561.683	585.711	604.093	604.048	590.179	607.436	616.216	631.01	599.298	589.532	607.472	584.442	589.71	591.166	602.009	601.669	585.119	586.807
band362	608.205	609.744	643.61	601.503	611.789	590.461	596.522	590.056	598.432	587.771	628.037	633.763	566.043	600.198	611.859	612.57	598.289	613.424	616.107	628.949	604.118	589.826	613.81	577.685	587.269	586.7	595.47	594.92	582.4	594.695
band363	599.967	613.278	645.784	613.221	611.032	601.143	600.303	592.713	597.062	599.506	622.969	627.974	564.002	589.451	610.592	615.048	596.118	614.175	609.665	641.952	607.587	583.575	612.663	592.677	591.552	594.567	604.135	616	587.04	588.486
band364	606.186	619.181	636.339	614.274	617.685	593.873	598.997	595.361	602.418	600.567	638.861	638.63	567.296	598.049	608.55	618.891	592.812	618.016	617.814	640.942	602.266	595.83	614.242	585.396	594.513	591.829	602.623	609.854	589.778	592.041
band365	613.194	607.272	646.952	614.333	620.648	594.89	601.063	598.132	599.959	602.74	621.851	639.572	570.715	584.925	605.379	602.782	591.022	620.161	623.807	633.256	610.82	590.041	616.602	592.289	593.963	594.153	604.7	609.324	592.349	589.118
band366	617.483	624.397	647.284	614.164	625.777	603.28	604.128	601.207	611.609	600.718	632.65	634.635	575.52	600.295	602.955	613.248	600.562	617.251	620.249	641.59	612.467	597.063	617.952	594.991	591.891	599.333	610.262	617.751	595.191	591.952
band367	612.681	611.522	647.497	622.156	619.934	595.01	600.188	595.669	608.917	596.708	628.452	628.975	574.152	596.491	619.579	625	599.472	616.917	615.523	634.625	613.176	593.384	616.567	588.395	591.156	593.904	603.579	609.784	593.207	601.885
band368	620.666	617.038	646.813	615.485	617.416	600.599	603.34	598.857	600.428	594.28	631.319	636.075	574.793	589.817	616.344	614.776	597.54	621.987	625.512	647.406	610.415	592.47	612.09	592.596	592.64	592.951	605.642	609.165	593.904	589.675
band369	610.374	619.556	642.758	610.692	618.072	599.505	607.14	598.479	599.29	602.873	631.681	644.409	582.802	589.715	610.145	608.667	595.05	624.506	626.209	651.509	607.306	589.955	606.763	596.604	592.473	597.776	603.677	613.267	592.94	590.29
band370	622.814	619.612	647.013	614.815	618.597	596.279	612.403	601.285	607.869	594.844	628.87	637.123	578.348	591.497	610.624	606.776	603.24	619.134	622.033	656.908	609.761	593.568	618.29	589.374	592.535	598.265	608.11	608.754	593.693	593.059
band371	618.131	626.472	653.703	617.8	621.258	600.129	601.365	603.922	606.055	614.039	636.598	642.125	584.178	604.156	626.666	622.073	608.367	624.09	623.537	648.092	621.111	602.602	611.535	597.694	606.514	598.796	611.426	614.629	599.35	610.382
band372	620.853	618.562	646.09	625.462	618.977	596.343	607.05	600.091	619.202	606.217	626.483	646.423	587.209	602.788	617.051	609.394	602.182	624.144	634.074	655.191	618.204	596.942	616.41	598.981	598.425	601.638	609.077	615.029	594.562	596.755
band373	619.123	634.109	648.687	613.151	624.361	609.29	605.815	605.685	612.051	607.436	621.486	649.828	591.178	603.024	598.601	624.261	607.692	628.928	627.214	651.02	616.92	601.21	615.775	596.916	605.323	603.216	610.259	614.915	604.168	609.826
band374	623.229	615.159	665.284	618.436	621.374	604.107	611.943	604.058	608.283	608.457	635.458	645.581	576.191	603.515	623.389	634.909	604.038	630.631	642.765	657.416	625.265	590.094	612.31	596.326	596.467	601.878	609.625	618.463	600.767	603.449
band375	630.213	616.825	668.652	608.092	622.688	600.35	607.767	607.572	621.802	609.771	627.263	652.004	582.739	610.627	616.572	622.867	610.415	631.449	630.581	644.345	627.54	608.469	620.322	597.041	603.172	601.83	609.923	619.483	609.866	609.523
band376	627.329	629.862	660.206	612.674	617.538	599.202	607.473	607.361	617.453	606.657	639.232	653.121	576.1	604.685	609.688	618.667	610.662	633.067	631.449	653.703	624.86	605.542	614.278	594.043	607.904	601.607	611.983	615.425	602.537	604.84
band377	626.709	622.722	660.294	611.003	623.682	601.136	606.81	608.457	612.255	610.377	642.102	642.614	577.148	600.18	632.257	606.836	604.879	632.306	630.807	646.218	612.225	597.648	624.538	598.745	605.22	604.589	613.42	621.498	606.83	594.359
band378	624.096	624.766	649.323	603.728	629.61	602.578	606.288	607.477	607.529	595.453	634.009	651.828	580.513	607.88	616.814	613.539	605.823	630.598	634.102	648.72	621.365	606.934	611	598.126	607.919	607.291	616.874	615.969	609.241	604.434
band379	627.639	613.062	657.371	607.046	617.625	602.262	610.473	608.118	593.34	596.299	629.495	647.491	583.585	602.1	616.447	618.067	604.575	629.196	627.656	646.867	616.152	605.408	610.622	587.137	599.613	604.584	607.614	611.785	605.809	603.212
band380	630.06	631.028	654.439	603.89	627.242	605.929	605.9	606.136	608.554	610.679	645.269	647.328	584.185	597.925	608.54	603.739	613.681	632.978	636.984	647.13	621.524	603.307	627.205	597.093	603.56	604.293	613.499	619.597	602.574	594.149
band381	629.666	616.578	645.223	614.562	619.021	599.042	614.043	612.858	611.894	597.856	637.313	652.135	586.35	601.412	603.412	607.558	604.72	631.69	633.093	646.082	622.86	596.91	623.143	597.452	609.893	604.448	614.745	618.582	612.692	598.502
band382	624.907	617	653.845	608.349	622.891	597.371	605.108	609.223	611.278	611.944	644.514	655.372	579.717	600.702	612.167	611.861	603.123	630.849	626.595	643.218	625.334	599.534	607.107	598.507	607.95	605.983	613.549	610.136	609.516	596.398
band383	620.226	620.891	654.277	605.756	622.378	603.75	613.737	610.36	602.018	614.253	632.669	647.377	587.804	604.199	615.521	604.152	602.091	629.358	637.791	655.611	614.623	590.752	609.202	599.759	612.719	611.669	614.669	627.967	610.883	596.443
band384	628.28	607.722	660.203	596.551	619.836	601.846	604.98	609.642	601.271	585.401	640.152	646.365	583.539	592.875	607.605	623.339	607.859	625.626	634.677	647.27	613.718	598.421	597.585	592.844	607.225	603.355	607.423	613.629	612.292	595.131
band385	622.153	612.528	651.629	619.531	618.11	589.487	615.692	609.931	614.915	605.752	626.759	646.796	585.487	599.192	603.424	612.442	601.291	627.915	623.888	650.321	607.59	605.761	613.487	592.561	615.455	605.746	610.165	618.053	608.108	604.131
band386	632.09	617.669	643.574	614.559	622.378	602.22	609.303	612.322	593.444	602.168	636.542	647.265	591.852	599.881	610.193	590.055	599.162	623.588	623.558	641.437	616.794	593.916	611.648	600.502	615.123	605.991	611.312	621.059	618.397	592.615
band387	637.719	619.966	641.539	605.297	624.283	594.494	598.212	607.911	602.761	595.91	620.387	652.291	582.42	603.659	616.83	624.4	604.63	624.94	629.835	652.242	631.491	606.921	605.107	591.412	610.815	606.739	601.465	612.4	614.05	601.69
band388	633.264	638.575	648.858	614.036	616.987	599.392	603.445	607.548	605.72	606.061	613.963	649.072	585.733	598.593	614.624	614.394	609.919	628.924	634.609	670.549	619.832	607.293	609.923	593.366	609.915	611.786	603.326	618.778	619.19	602.382
band389	645.851	624.978	657.684	607.792	624.877	580.576	599.265	614.927	601.892	604.204	622.588	660.742	594.774	602.523	607.418	597.424	604.518	626.219	640.237	646.362	622.737	605.868	608.332	597.941	610.631	603.034	606.292	619.167	616.028	592.91
band390	625.377	612.544	642.003	601.262	617.447	590.227	605.77	612.269	604.609	615.611	616.567	654.754	589.585	591.001	607.244	599.158	598.516	624.063	621.03	630.608	606.462	590.426	611.575	598.996	613.055	611.988	611.127	609.43	619.92	588.923
band391	623.864	623.725	651.965	588.467	604.696	576.381	613.092	603.548	608.52	588.674	618.923	644.625	582.554	590.216	616	602.77	595.085	635.019	619.316	641.447	606.763	595.246	607.51	591.992	614.218	605.507	593.868	607.534	619.867	588.595
band392	622.135	614.109	642.945	571.354	608.139	577.293	606.057	601.435	602.671	585.664	610.842	645.598	587.454	597.44	604.003	593.139	595.519	621.984	621.914	640.741	607.664	599.194	594.857	585.767	604.564	589.304	587.962	590.283	608.995	590.499
band393	647.291	605.772	644.21	591.495	614.469	573.755	600.358	605.995	581.414	582.92	602.421	623.795	568.328	595.188	593.283	592.636	587.285	621.275	614.937	631.901	612.995	592.273	582.935	580.911	616.846	593.947	592.358	604.283	609.368	588.045
band394	630.099	587.869	628.448	574.608	603.629	574.211	603.67	604.834	582.575	591.319	613.777	637.582	571.704	575.579	593.775	581.685	587.264	626.847	643.737	656.662	604.791	593.231	584.415	579.469	613.88	600.594	581.047	587.587	617.677	587.157
band395	608.623	606.172	654.635	555.141	596.235	570.755	589.483	597.086	585.697	575.353	606.508	629.33	571.872	591.563	595.206	588.321	587.121	603.829	596.823	638.98	596.536	591.951	575.832	562.037	602.251	588.257	578.886	588.851	607.3	576.795
band396	608.403	603.562	645.561	565.492	614.707	550.75	587.003	592.369	580.232	579.854	588.217	618.623	581.454	572.606	572.045	593.539	576.541	615.931	596.551	636.44	600.088	586.771	570.008	566.238	601.719	587.04	577.298	581.011	611.265	581.081
band397	616.331	583.809	633.487	564.287	600.013	555.999	580.33	593.349	586.382	577.966	608.477	619.346	560.778	583.386	579.643	568.715	571.127	597.832	593.363	609.775	595.848	583.457	577.242	564.803	609.918	574.203	569.459	583.441	607.97	576.167
band398	617.359	592.837	639.729	542.595	582.663	545.39	591.305	589.533	581.823	578.742	593.341	621.812	547.322	582.668	572.402	579.521	570.409	610.996	605.279	620.235	591.356	583.413	574.153	566.168	601.709	581.813	559.959	573.234	609.334	573.231
band399	611.589	590.9	618.761	535.205	578.286	530.084	573.245	583.539	588.487	566.051	606.666	611.868	558.193	569.806	558.495	569.43	564.316	601.746	600.691	628.676	577.6	580.009	543.523	552.141	590.378	579.794	551.34	566.988	595.326	569.25
band400	611.361	577.263	623.432	536.215	586.839	529.164	573.14	584.043	561.262	554.543	573.57	608.553	544.98	547.714	535.82	540.133	556.648	594.123	590.965	629.307	575.618	570.93	559.24	555.888	600.072	568.614	562.662	570.879	600.776	554.956
band401	621.745	555.862	643.839	547.721	582.503	517.543	564.227	586.547	535.697	554.898	588.842	606.604	543.085	562.017	555.624	528.642	553.671	594.498	601.365	608.16	579.874	573.151	534.43	550.69	585.584	567.803	559.149	562.403	609.449	551.839
band402	614.421	577.938	613.513	532.069	580.041	511.973	549.218	578.619	569.103	549.431	567.817	614.03	555.811	548.416	541.756	525.364	548.6	600.816	590.274	624.863	570.429	568.208	528.653	555.354	578.858	567.372	550.617	551.146	602.336	544.428
band403	598.749	564.544	613.235	532.397	560.645	517.948	564.125	573.89	551.959	545.182	563.375	608.712	530.183	532.982	538.637	539.327	541.543	592.525	581.698	620.836	558.744	560.702	528.847	536.455	586.372	565.761	545.526	544.134	596.778	544.456
band404	590.639	575.916	621.765	528.559	565.097	503.619	540.842	567.742	551.508	554.487	571.824	606.268	554.437	528.723	532.273	548.479	539.06	583.437	583.084	609.819	554.308	564.041	512.265	534.352	579.29	568.8	548.026	550.267	587.696	537.734
band405	617.755	556.775	612.294	523.018	578.862	501.281	554.713	572.572	533.848	547.414	571.963	609.604	549.624	548.272	546.772	541.539	551.301	587.396	584.967	597.549	563.225	574.342	504.152	524.026	574.001	552.571	543.417	550.907	594.004	559.335
band406	594.853	553.222	621.781	512.603	557.779	504.797	566.312	565.778	568.32	553.898	588.533	591.777	524.789	543.545	525.823	562.788	535.23	583.633	584.512	604.143	560.055	567.352	504.663	534.721	588.717	552.62	533.108	545.5	590.811	563.353
band407	609.647	552.009	608.142	529.692	562.353	514.625	562.265	567.407	545.152	557.942	575.638	599.705	542.976	548.818	528.543	533.006	543.199	588.155	572.2	611.631	557.443	568.133	505.13	533.967	581.681	566.293	532.636	549.7	597.436	546.053
band408	600.446	555.375	631.258	526.572	569.666	511.541	565.09	573.546	539.044	552.029	561.43	607.261	514.557	533.494	542.193	547.867	534.329	587.794	574.158	618.232	564.031	551.095	514.028	524.468	586.86	549.583	536.125	551.913	592.424	533.519
band409	616.421	564.244	632.939	526.403	556.714	513.833	539.645	569.931	538.184	537.36	564.384	586.53	538.578	531.845	517.585	545.885	526.749	577.904	557.784	603.444	559.014	548.502	503.723	537.36	594.294	550.688	533.091	532.568	595.199	551.313
band410	603.258	560.572	662.303	496.992	561.996	513.813	549.103	563.573	560.894	535.878	573.427	597.149	545.265	535.517	528.884	574.552	537.432	579.32	575.298	590.833	562.441	566.852	530.222	524.909	572.536	547.405	523.655	537.518	585.784	552.653
band411	615.168	566.712	624.981	495.503	562.371	504.808	567.752	565.751	538.761	533.418	569.39	602.056	557.396	516.042	517.621	498.582	539.36	574.526	542.344	593.925	570.237	567.098	514.793	526.763	571.987	564.909	510.961	540.755	603.056	524.79
band412	624.847	588.931	592.142	532.895	552.246	495.74	561.703	573.105	554.439	542.662	585.892	609.968	546.285	535.588	515.778	560.297	541.465	569.875	571.105	593.113	546.779	564.7	501.47	531.061	575.267	548.918	525.787	518.947	592.394	549.005
band413	599.644	571.578	627.274	530.746	554.84	517.17	545.167	573.73	535.094	551.822	559.347	602.789	530.22	536.464	531.653	514.273	536.468	577.611	550.179	588.464	547.244	549.653	522.808	532.101	589.232	548.506	532.705	549.539	598.869	528.508
band414	639.757	538.8	591.358	524.454	590.672	516.633	585.69	586.422	517.384	528.569	572.316	612.314	527.078	519.586	516.273	512.861	527.688	578.573	580.195	609.068	569.327	553.777	518.947	533.064	593.774	570.412	526.851	550.687	617.279	537.041
band415	616.73	552.069	630.677	495.059	569.868	496.284	541.958	574.819	531.28	532.973	559.684	609.904	523.774	533.124	514.537	509.182	530.625	587.635	564.514	623.29	561.863	550.941	506.067	515.521	572.3	547.542	525.58	535.751	604.141	547.867
band416	596.938	564.606	641.861	541.705	569.326	500.417	541.365	562.018	552.589	513.569	561.743	598.514	537.965	518.711	525.293	545.424	522.732	579.376	559.074	566.273	542.808	563.823	481.772	505.467	570.73	526.086	521.611	544.284	581.914	547.674
band417	609.937	570.397	645.074	539.238	593.196	517.993	554.973	587.851	535.807	564.693	542.576	607.153	511.135	524.832	552.116	555.158	518.093	578.749	557.242	615.27	543.529	551.706	526.003	537.622	587.412	567.876	554.268	551.464	610.481	542.876
band418	601.868	528.581	631.884	533.777	562.267	508.909	550.833	571.7	557.451	525.577	578.449	589.495	503.348	514.689	534.17	473.921	505.168	556.555	557.616	581.222	553.412	533.211	479.66	513.579	552.392	547.838	516.446	528.893	586.157	525.786
band419	613.45	574.819	640.142	536.621	586.663	528.141	560.483	597.436	540.239	513.603	570.195	644.082	520.185	541.454	531	490.558	540.186	579.974	579.77	610.788	569.889	557.303	523.765	538.137	584.32	557.822	530.096	562.425	606.694	554.633
band420	624.635	570.497	649.632	495.731	564.109	513.598	542.962	596.779	558.434	553.382	563.217	592.389	560.735	515.022	517.486	517.436	532.624	580.439	545.365	600.253	553.763	550.763	490.57	536.505	571.345	549.821	534.323	538.882	596.952	527.199
band421	609.08	546.112	653.032	538.062	570.603	525.115	542.198	574.067	551.474	544.297	574.034	611.565	536.88	523.436	541.315	509.836	541.348	583.922	558.54	596.543	554.955	541.79	539.785	519.693	593.462	555.216	543.436	550.056	613.857	554.278
band422	623.62	525.781	613.597	518.285	570.56	543.553	578.133	588.471	574.644	561.022	568.288	620.632	524.235	546.145	522.987	526.83	525.245	594.317	569.681	628.553	574.433	537.812	526.57	524.241	569.713	573.304	529.583	557.446	616.121	566.776
band423	632.008	586.909	635.652	601.659	594.804	538.92	572.925	592.206	548.92	577.825	607.601	623.084	531.443	538.157	528.752	511.333	535.637	588.068	591.393	599.297	572.327	563.304	516.465	529.617	584.646	558.425	551.876	561.711	622.312	545.397
band424	654.726	584.728	673.013	534.113	608.606	536.403	547.798	597.515	556.359	573.766	575.189	630.089	550.015	565.799	541.46	538.77	554.341	589.327	589.1	619.355	579.924	577.452	526.94	535.503	581.64	538.499	555.602	547.605	604.185	575.227
band425	652.598	605.256	647.584	563.415	594.391	553.862	588.197	596.316	567.646	558.182	584.604	596.114	529.637	582.826	525.852	565.212	551.086	598.221	604.677	592.375	593.294	579.153	533.513	540.137	574.44	570.808	556.799	558.634	619.638	573.345
band426	625.513	615.941	652.955	610.726	608.075	546.789	609.672	608.133	576.972	616.367	580.257	639.016	540.307	545.087	581.341	552.727	549.434	576.908	597.288	618.642	573.751	572.982	589.438	556.272	648.809	588.588	582.79	599.984	642.337	561.989
band427	674.662	606.75	650.461	531.087	618.865	552.022	576.753	604.773	559.308	561.319	605.279	640.502	549.185	548.748	569.842	599.103	554.035	586.534	600.228	635.061	597.941	555.631	541.188	534.396	582.927	575.256	537.852	541.572	599.632	579.549
band428	664.148	581.856	624.645	502.99	593.742	540.741	586.817	592.81	532.733	528.964	561.486	594.788	535.591	563.696	515.486	546.412	555.764	573.014	584.977	585.84	581.888	574.903	511.288	556.267	596.023	551.773	566.247	550.917	601.123	571.951
band429	625.386	626.591	636.829	585.415	579.977	534.79	569.367	585.177	581.398	539.516	580.777	627.239	528.465	546.946	542.019	510.073	562.009	591.987	572.228	603.246	559.581	586.888	505.983	550.521	592.774	565.462	553.226	561.152	610.962	557.603
band430	657.969	589.8	650.319	539.682	602.746	550.818	610.733	600.553	587.246	568.796	605.805	660.289	570.48	542.763	573.26	516.733	558.348	602.175	638.233	629.198	574.529	564.096	542.643	578.338	579.907	559.627	561.441	570.161	633.352	561.379
band431	623.264	609.716	689.097	547.144	581.626	529.789	587.69	587.073	602.143	567.71	620.991	615.94	582.902	572.84	558.659	562.903	569.283	585.093	584.098	603.102	582.064	563.994	545.745	531.516	592.981	574.723	565.045	582.581	599.998	585.282
band432	672.708	614.638	649.939	570.174	598.977	592.485	633.325	617.938	555.398	605.397	632.567	594.933	539.267	545.733	589.746	494.152	549.063	590.224	578.17	564.242	579.91	551.019	573.21	574.004	614.915	608.653	581.568	579.981	624.781	537.765
band433	653.626	600.022	698.19	585.564	592.38	576.035	604.583	615.262	604.667	561.117	604	628.189	556.176	573.822	578.299	580.588	570.451	595.074	577.191	589.031	604.787	591.611	568.93	581.251	575.63	587.041	576.302	571.628	604.071	584.173
band434	643.428	559.475	640.006	580.81	599.098	550.517	592.828	602.947	538.182	567.749	603.167	616.096	573.183	578.593	546.238	522.739	576.755	594.121	562.288	561.785	594.817	563.543	566.945	555.216	587.777	579.131	557.21	553.558	613.446	562.027
band435	634.171	632.688	625.274	567.474	615.277	588.214	625.778	589.867	624.329	585.83	596.446	643.356	569.002	574.139	525.695	552.418	571.485	605.392	623.24	632.993	561.841	566.942	569.997	565.042	611.478	594.082	569.58	611.153	617.834	587.532
band436	646.586	598.638	686.861	613.128	660.447	590.424	602.17	609.476	586.63	599.285	603.728	698.651	565.32	558.239	563.412	566.812	568.851	610.004	615.647	622.314	561.958	598.569	596.653	571.379	630.617	585.832	572.319	603.303	629.048	589.654
band437	641.965	611.25	682.152	627.454	625.981	559.251	586.227	592.741	601.471	578.564	644.808	631.667	571.004	576.684	552.974	599.752	582.381	608.723	617.807	642.126	600.507	581.5	560.11	554.881	601.612	584.818	584.507	581.837	604.38	578.757
band438	650.005	628.641	638.419	535.197	636.144	575.498	575.755	593.794	598.993	533.827	604.39	640.374	577.313	600.751	546.543	610.182	589.337	602.291	609.705	617.993	584.031	608.357	572.515	527.517	592.395	574.721	569.398	566.214	604.424	617.878
band439	658.846	597.05	697.239	569.503	594.746	568.303	597.225	600.761	603.338	610.311	628.009	657.532	547.952	610.058	575.572	559.824	577.734	580.35	590.033	583.829	570.696	590.232	569.467	564.001	616.672	591.465	599.088	598.569	614.513	612.669
band440	654.55	599.984	702.61	603.818	659.521	598.621	692.807	626.42	595.2	645.881	673.954	670.144	600.733	572.295	623.678	567.873	569.548	629.821	640.749	636.389	602.04	580.396	609.2	598.618	645.44	615.551	615.208	631.069	658.004	570.41
	451.048	492.167	499.215	490.36	464.703	472.863	456.162	440.754	483.128	464.499	492.554	481.793	442.23	460.702	493.897	479.474	471.255	468.84	476.854	486.72	458.349	454.269	484.139	459.799	433.012	442.44	470.842	472.918	425.609	468.103
	618.205	681.156	714.235	647.559	628.538	614.146	601.123	588.136	662.756	621.708	713.82	694.993	610.602	627.44	702.81	664.57	646.287	674.89	675.133	701.587	628.33	632.908	643.74	608.464	581.1	587.101	630.53	623.071	571.356	646.706

## Sheet: 12h
band	1	2	3	4	5	7	8	9	10	11	12	13	14	15	16	17	19	20	21	22	23	24	25	26	27	28	29	30
band1	564.293	531.686	529.019	544.042	571.63	514.885	530.098	529.076	544.422	537.318	543.721	597.409	514.337	665.232	489.91	546.513	538.556	521.618	533.606	519.443	495.337	527.643	533.695	514.918	522.481	550.955	517.179	553.217	538.651	539.647
band2	556.547	576.73	466.119	512.456	569.933	527.735	510.883	514.394	544.021	506.255	491.043	545.479	477.308	578.932	460.349	497.296	516.564	531.964	514.131	510.365	490.49	541.906	502.582	483.29	611.753	498.682	533	528.653	521.388	528.507
band3	503.344	456.29	491.881	541.953	543.82	512.115	524.643	537.053	535.985	483.521	510.782	556.728	488.236	607.288	480.282	455.416	476.898	480.881	509.496	524.251	449.243	522.849	525.824	484.792	517.071	512.256	572.795	482.874	510.306	513.06
band4	497.791	513.908	490.245	482.783	540.244	529.524	488.941	520.158	534.262	511.047	516.477	588.274	447.877	575.96	399.836	499.006	489.592	466.734	501.873	518.21	542.606	526.622	466.505	487.914	545.435	475.152	519.417	524.718	507.183	510.89
band5	450.26	449.529	458.906	480.899	530.176	487.163	489.913	501.819	504.705	526.226	530.372	573.539	487.413	565.486	466.8	479.166	474.495	448.718	508.255	486.215	461.637	507.782	477.821	472.863	451.455	500.01	539.231	462.661	491.911	487.96
band6	458.05	452.701	458.049	482.152	502.867	458.099	474.276	493.011	507.546	518.732	525.93	574.061	487.064	536.765	507.933	459.467	465.385	463.154	493.966	505.634	465.234	485.093	466.602	477.711	487.312	498.581	521.601	466.79	489.063	480.548
band7	436.33	384.2	433.336	408.948	475.611	466.121	437.659	466.126	473.414	465.349	486.551	565.024	436.52	531.17	401.256	424.377	433.592	418.879	429.795	457.024	399.831	461.949	437.793	422.887	447.838	426.118	474.844	448.486	448.251	444.709
band8	414.188	398.534	440.781	426.107	462.125	431.429	440.363	459.481	467.303	463.206	487.776	528.372	468.033	499.108	440.687	437.57	413.436	412.906	426.977	465.724	401.322	431.314	429.44	387.712	456.571	446.179	478.564	432.028	444.544	440.352
band9	428.64	397.697	405.04	420.656	474.228	444.779	432.966	446.791	468.733	450.384	453.38	529.882	439.78	483.805	396.085	401.355	468.329	396.022	435.344	422.374	370.853	464.083	427.911	422.007	438.974	429.04	456.627	446.225	437.571	436.992
band10	382.502	377.984	405.423	422.377	420.708	402.77	403.056	409.498	419.953	400.34	413.264	490.54	371.039	474.988	377.608	407.286	403.388	367.592	415.361	433.689	375.213	417.816	396.991	371.283	427.656	390.749	447.696	398.945	408.061	404.461
band11	390.16	358.723	400.432	378.531	435.26	405.59	395.316	414.654	425.265	437.349	435.494	499.092	398.06	429.201	370.187	380.872	417.872	371.79	407.157	402.686	342.008	419.151	380.185	382.473	418.104	398.495	400.715	404.872	403.56	404.128
band12	381.388	377.427	391.349	390.858	417.909	411.991	397.122	406.062	413.028	415.519	420.05	478.655	372.269	466.873	363.577	363.29	401	360.363	381.545	399.935	332.156	397.646	394.329	369.435	431.39	404.125	422.691	409.851	398.994	400.265
band13	348.533	322.752	384.987	389.936	420.698	394.544	391.081	389.149	403.058	421.294	426.848	493.891	394.4	432.567	373.097	372.227	396.459	380.251	412.301	418.846	345.241	403.838	392.58	374.465	428.357	418.826	419.297	418.19	398.847	386.603
band14	365.091	328.61	322.315	350.26	386.021	379.048	373.16	396.534	401.439	393.046	400.836	487.913	380.828	439.443	329.218	335.793	386.048	355.749	383.479	393.39	342.011	408.781	379.159	350.475	428	379.762	429.177	407.093	382.596	369.552
band15	349.298	342.141	351.947	358.125	389.469	362.51	372.953	379.292	380.918	384.494	396.607	457.717	379.333	430.381	325.421	338.613	368.258	332.988	369.332	366.571	313.932	378.829	372.432	339.605	385.604	378.086	422.604	391.136	372.093	367.115
band16	350.471	341.697	345.894	356.262	396.518	373.665	372.001	393.197	384.984	392.814	397.699	472.676	359.294	439.406	318.023	349.254	368.602	334.866	379.568	382.086	318.58	381.429	362.571	347.13	389.396	368.2	431.009	390.58	374.924	370.75
band17	346.291	328.589	321.979	353.959	388.778	362.268	365.602	380.164	380.279	387.814	398.056	463.582	364.06	419.625	334.356	349.611	363.992	348.155	372.759	374.324	314.896	374.244	357.605	335.227	420.188	371.498	406.116	373.551	369.913	361.572
band18	342.8	323.475	331.847	332.606	384.059	355.785	366.796	382.981	372.366	398.974	397.648	486.548	378.692	419.146	326.397	341.824	368.617	330.968	361.434	379.687	326.426	357.516	357.796	342.508	416.214	363.853	407.625	373.042	368.844	359.169
band19	340.408	335.399	323.866	330.125	375.885	343.009	349.989	383.225	377.412	389.32	403.991	464.578	347.708	433.186	302.067	320.793	370.48	320.185	348.434	360.563	301.889	362.535	359.025	320.504	428.195	351.607	421.71	373.024	362.111	354.864
band20	333.143	321.641	325.677	329.964	377.218	348.954	359.6	381.053	374.397	395.487	398.194	485.654	371.409	426.647	331.972	332.03	358.788	341.03	365.006	379.6	346.162	372.137	352.481	347.956	397.435	353.176	403.38	376.977	367.399	354.713
band21	338.592	320.947	328.219	334.87	382.165	347.078	360.085	376.437	376.665	399.306	401.671	485.161	377.318	418.681	337.072	328.529	354.982	333.823	372.117	376.759	328.066	371.748	346.074	338.945	414.461	357.84	413.276	374.589	367.696	356.436
band22	327.039	306.922	331.364	339.867	386.044	350.15	357.316	372.028	369.988	385.914	385.007	473.972	364.464	412.477	314.418	324.249	369.061	326.44	370.796	372.904	320.565	364.969	354.201	334.73	390.961	356.527	395.833	379.904	362.075	352.663
band23	343.687	326.289	308.574	327.648	380	357.848	353.075	371.707	367.645	383.276	384.061	459.467	342.505	401.31	310.297	318.718	366.112	333.231	365.769	380.587	317.785	371.047	345.787	326.259	410.636	361.931	401.639	388.944	360.923	351.975
band24	326.516	315.595	316.572	323.755	378.5	347.498	351.887	363.693	374.798	387.676	400.775	473.794	348.563	424.316	313.033	328.864	355.515	322.749	354.517	376.626	316.2	363.579	342.23	328.819	402.091	355.219	393.533	376.563	359.41	348.649
band25	316.797	304.292	308.291	323.194	375.862	351.322	352.933	360.038	363.424	391.873	389.557	473.205	343.433	399.901	306.395	320.795	358.232	320.489	351.502	373.486	319.827	363.311	359.675	323.561	401.727	359.93	403.224	365.97	356.509	344.803
band26	333.805	322.396	322.545	321.33	386.036	353.012	347.153	362.556	361.082	385.351	393.896	485.4	362.743	404.294	321.39	310.051	358.622	322.3	362.758	375.096	318.859	369.026	349.853	331.363	401.435	351.949	392.295	384.878	360.41	349.526
band27	327.171	314.39	325.668	331.472	376.908	343.698	342.282	359.451	359.329	376.554	377.03	467.744	351.343	404.161	304.428	319.87	343.069	310.657	351.915	371.774	297.279	364.402	330.378	316.708	397.506	356.997	388.033	374.562	353.028	345.692
band28	314.919	298.377	311.689	318.776	383.921	348.113	345.209	365.042	360.21	389.155	385.174	474.924	349.988	421.068	304.838	309.394	364.041	319.216	354.429	368.564	300.855	368.752	346.85	328.82	392.818	366.559	401.927	374.211	355.994	343.541
band29	321.091	305.933	321.083	315.651	375.095	332.418	347.147	357.72	354.17	384.858	385.068	467.738	346.413	395.916	295.915	291.923	346.24	316.011	351.024	362.975	307.68	364.866	345.85	329.71	384.175	355.387	387.592	372.497	350.791	341.517
band30	327	308.956	311.166	316.783	379.476	342.444	343.608	362.852	355.494	385.491	381.795	466.094	346.351	402.492	293.349	305.312	350.094	304.69	356.061	372.412	301.977	363.809	335.836	321.485	390.539	345.922	397.191	369.869	351.377	343.327
band31	320.02	299.881	309.491	323.557	376.303	338.163	343.026	357.245	352.389	384.879	367.214	463.356	341.444	399.43	289.69	304.383	359.816	308.034	351.949	363.917	287.46	355.848	343.485	314.957	380.37	349.399	390.358	376.127	348.293	340.495
band32	309.026	312.734	297.334	306	379.231	338.785	346.793	354.785	350.455	379.485	380.335	466.508	357.971	395.248	313.687	298.83	352.704	315.599	350.35	370.074	313.475	358.822	343.93	325.846	410.851	349.315	387.37	367.522	351.181	337.463
band33	315.278	297.801	298.402	322.823	379.498	335.216	341.318	347.31	348.988	377.904	370.704	464.507	343.899	401.604	287.674	296.215	343.638	311.828	350.514	368	300.896	355.675	334.162	311.719	386.052	347.393	374.465	363.948	345.623	336.454
band34	312.73	294.178	306.721	298.682	373.144	328.369	333.759	355.464	351.971	374.124	370.064	463.111	338.616	407.266	294.646	289.87	341.834	304.696	339.581	362.205	300.944	355.2	330.175	317.777	393.221	339.5	388.483	365.827	344.006	332.914
band35	318.594	302.508	297.445	299.097	374.445	331.916	335.652	350.919	348.603	368.778	371.486	457.171	335	401.313	294.926	293.817	347.561	303.602	336.405	360.517	289.714	348.97	335.26	316.989	378.571	337.629	387.071	362.29	342.366	332.796
band36	314.853	287.674	302.664	298.366	374.397	330.325	336.203	348.236	347.448	372.923	370.92	466.66	334.821	395.957	284.533	289.31	344.952	300.583	335.231	354.47	283.638	355.568	332.816	314.309	374.078	351.326	385.274	363.527	341.109	331.309
band37	311.322	286.551	295.364	300.169	374.088	323.701	336.231	350.483	346.485	369.731	363.152	457.277	325.337	401.025	282.931	291.404	349.791	300.123	339.688	357.536	285.661	351.973	335.315	309.419	376.74	339.998	382.528	354.916	339.248	329.413
band38	313.932	298.836	296.04	300.076	373.532	329.013	330.191	346.808	346.253	376.132	363.668	458.664	339.797	397.972	301.179	291.58	340.138	305.169	345.898	360.341	291.098	351.069	327.04	311.247	378.448	343.027	386.198	355.906	341.402	331.081
band39	316.09	290.559	295.004	295.821	370.274	321.587	327.597	349.076	344.472	374.002	367.618	457.585	334.55	400.176	291.336	282.724	337.207	300.123	345.415	361.687	283.055	351.087	327.198	312.682	383.656	343.907	377.172	353.736	339.121	328.448
band40	308.127	286.444	304.004	304.552	370.387	329.225	331.049	340.261	337.89	375.705	363.462	453.905	331.497	386.353	288.197	288.282	341.505	305.22	341.352	364.252	279.282	350.565	330.587	311.66	383.156	343.519	377.849	354.123	338.658	328.764
band41	312.38	278.54	296.917	299.73	371.882	321.71	335.331	335.424	337.613	373.349	370.882	453.222	331.856	400.04	284.721	292.84	338.908	299.013	340.932	360.808	281.904	351.382	330.234	307.523	388.851	335.875	381.08	352.854	338.064	326.288
band42	310.533	289.193	280.53	287.407	368.444	321.944	331.321	335.622	336.171	366.946	355.973	457.402	330.382	391.142	277.882	291.203	338.605	293.424	338.837	355.998	277.906	347.855	327.136	302.047	377.442	337.38	379.349	350.08	334.22	322.811
band43	312.84	288.919	288.66	285.631	367.746	318.316	323.846	335.342	336.934	363.614	359.073	450.575	329.304	390.594	287.162	269.968	335.184	289.826	332.065	347.296	276.132	344.889	318.432	303.792	388.377	333.545	374.877	350.999	332.283	322.185
band44	307.389	281.873	292.234	293.408	368.122	312.616	323.774	335.491	333.157	366.397	360.808	451.819	324.224	397.31	275.159	277.911	328.454	290.877	335.786	355.534	282.409	339.291	318.17	300.576	384.922	325.634	381.182	345.364	331.782	321.446
band45	298.583	283.968	289.234	286.391	368.493	314.862	327.444	332.179	334.22	366.214	362.309	455.521	321.409	393.467	283.531	278.586	340.564	289.967	330.583	353.057	283.124	338.886	329.152	301.296	374.331	327.947	369.078	348.016	331.515	320.159
band46	302.819	285.425	279.279	281.73	368.825	313.052	325.761	330.965	330.893	365.106	356.128	453.99	323.848	390	278.926	272.529	326.268	286.098	337.503	347.829	277.976	338.608	316.008	302.792	380.63	330.952	369.542	346.934	329.3	318.385
band47	304.857	277.699	290.306	281.827	366.891	313.237	318.814	330.613	328.695	360.869	354.929	449.769	320.772	394.133	277.156	274.525	328.546	287.206	336.271	350.281	270.524	338.594	314.721	300.367	368.143	326.414	375.462	345.834	328.123	317.381
band48	298.259	275.916	285.07	290.1	372.658	316.718	320.357	327.227	331.445	362.637	349.12	455.338	317.682	386.384	279.062	275.949	334.304	287.828	334.407	353.423	274.55	343.38	317.597	298.73	366.708	332.051	366.764	350.998	328.738	318.039
band49	299.924	280.215	281.174	285.663	370.223	312.807	322.764	326.107	327.031	365.534	351.641	456.141	325.082	392.189	278.618	281.377	333.288	294.039	338.381	354.468	277.358	341.068	320.822	303.633	374.597	335.489	377.134	349.821	330.593	317.144
band50	298.062	280.178	287.943	279.894	370.508	313.12	321.334	326.958	328.22	361.269	346.34	445.791	317.992	392.978	276.426	273.769	332.712	281.61	328.004	350.171	267.29	344.114	318.593	299.583	368.26	327.267	373.675	349.85	327.211	316.749
band51	296.704	276.375	282.623	278.462	369.249	311.003	318.289	322.209	325.086	362.139	352.607	454.979	323.614	388.861	276.374	275.85	332.821	282.478	333.354	350.961	269.073	339.956	314.887	300.782	366.325	327.564	373.066	349.688	326.978	314.214
band52	300.095	274.575	272.089	282.844	369.552	308.751	322.142	321.265	324.549	363.375	350.075	452.587	316.797	387.523	271.405	281.095	332.452	285.54	333.741	350.943	272.433	345.876	322.346	298.962	370.753	328.573	373.342	345.996	327.131	313.924
band53	302.784	277.573	282.396	281.745	370.204	308.687	317.362	321.239	325.416	366.034	349.838	455.057	316.967	391.95	272.077	270.787	324.12	279.884	334.48	349.71	272.041	342.725	312.268	295.509	380.558	328.278	374.071	349.288	326.895	315.344
band54	299.291	277.993	282.198	277.291	370.581	310.821	321.116	319.422	323.793	363.791	348.456	455.889	319.688	381.006	275.064	269.714	326.528	279.037	337.169	349.951	267.454	344.671	313.631	298.286	374.162	326.502	372.71	346.006	326.151	314.63
band55	295.016	273.322	274.996	272.631	370.178	305.191	313.736	319.793	321.554	358.56	346.292	447.146	313.316	387.025	266.682	260.606	329.699	274.068	330.711	347.658	265.979	341.655	318.158	292.863	370.753	327.673	370.434	342.942	322.808	310.498
band56	298.606	281.064	276.187	273.228	371.371	307.21	314.694	318.836	322.887	362.063	347.08	451.35	306.793	394.009	272.838	267.544	327.597	277.158	334.976	350.546	265.397	344.216	312.956	296.31	372.448	325.524	373.274	344.013	324.649	312.615
band57	297.536	274.897	274.845	273.852	370.59	307.546	314.204	315.612	317.489	356.958	341.617	451.012	311.131	387.39	264.615	269.724	327.753	273.762	336.578	348.997	262.266	343.183	310.447	292.473	367.273	329.81	375.382	345.828	322.956	310.353
band58	296.67	273.2	275.817	274.594	368.415	303.223	312.249	319.886	320.074	356.802	341.623	449.043	305.858	390.015	268.231	263.268	329.138	276.598	332.466	348.272	262.539	339.585	315.882	291.99	363.396	328.313	372.401	343.347	322.246	310.093
band59	295.27	269.036	274.979	276.065	370.157	306.827	315.089	317.326	321.553	358.153	343.392	449.499	313.051	392.068	265.61	267.091	329.714	278.244	335.759	350.63	263.034	346.032	308.946	294.24	370.156	329.387	369.304	345.95	323.449	310.445
band60	290.501	266.355	271.73	277.433	371.687	300.097	311.813	313.647	319.917	363.386	340.208	453.244	307.661	392.898	266.562	268.819	322.929	277.103	336.032	352.333	265.778	340.396	312.937	294.256	372.266	324.529	373.939	343.19	322.559	308.657
band61	291.789	266.592	273.753	266.785	369.987	300.102	313.124	316.155	318.605	361.369	344.688	447.554	311.754	391.003	264.477	263.675	331.199	273.988	333.725	346.537	260.484	341.342	310.893	293.288	370.753	324.588	365.608	340.193	321.215	307.826
band62	293.744	269.159	270.934	269.132	368.572	297.347	314.943	318.843	315.791	358.139	339.597	451.196	310.569	387.938	266.259	262.493	323.418	274.039	332.028	351.358	261.352	342.757	312.387	291.755	374.065	319.407	366.425	341.046	320.882	307.66
band63	294.837	267.477	269.836	268.442	370.674	299.953	312.798	315.414	315.436	359.164	342.442	446.687	311.762	391.576	265.577	267.919	322.584	273.637	333.585	350.614	261.444	341.837	311.213	291.326	366.123	322.684	369.358	339.882	320.867	307.403
band64	293.757	264.022	272.472	263.748	369.75	296.614	313.782	314.033	314.908	355.079	341.434	444.533	306.384	388.755	263.295	261.673	322.671	274.472	339.985	348.953	261.61	340.045	312.123	293.266	364.61	320.957	365.491	339.94	319.584	305.816
band65	290.017	264.066	278.287	267.208	371.765	293.177	310.739	312.997	315.512	361.537	343.472	450.212	310.671	385.046	265.213	262.469	324.906	271.4	333.059	348.505	260.655	338.701	311.121	292.441	369.357	319.604	364.427	339.746	319.868	306.531
band66	294.69	262.166	270.111	265.894	370.955	296.764	311.376	312.819	316.067	357.922	339.964	444.939	303.883	385.006	263.287	259.45	319.786	268.59	335.283	349.35	256.65	340.401	306.87	291.284	360.805	319.925	364.408	340.173	318.172	305.876
band67	284.927	262.127	267.866	268.382	373.043	299.136	310.694	313.416	314.775	356.643	337.547	444.857	307.571	388.288	258.703	260.554	319.173	271.363	336.376	348.723	259.348	341.285	306.606	290.162	368.89	320.789	366.38	341.369	318.536	305.101
band68	288.067	262.478	268.638	263.994	376.055	297.78	310.348	312.765	314.595	351.978	337.376	445.313	309.224	387.511	258.136	258.892	319.855	270.84	335.251	350.659	261.288	340.07	306.093	293.411	368.084	320.573	360.479	342.408	318.291	304.67
band69	285.992	263.874	268.417	262.721	373.637	297.297	308.459	312.478	313.81	357.053	340.963	444.359	301.513	388.533	262.618	257.264	321.571	265.43	332.076	350.295	253.872	342.292	303.021	288.831	359.058	324.725	364.2	339.957	317.297	304.374
band70	290.882	264.842	265.781	263.423	374.886	300.772	311.225	310.19	313.664	356.482	338.088	443.886	305.934	385.173	268.951	256.817	327.579	270.454	335.067	346.402	259.838	339.92	305.286	291.022	365.175	323.681	361.033	342.869	318.547	305.215
band71	284.668	261.516	263.696	261.726	372.983	297.594	309.639	309.25	313.227	356.402	340.473	444.356	306.275	380.567	262.882	257.12	324.056	267.139	332.978	346.948	256.962	338.518	305.747	286.193	364.266	323.506	364.465	341.783	316.962	303.07
band72	288.271	266.675	265.904	262.447	374.088	295.756	311.419	309.738	313.387	358.391	335.682	444.456	303.199	390.678	258.959	254.398	322.696	266.475	333.966	345.819	256.701	335.233	303.764	290.888	362.045	319.634	362.564	338.706	316.855	304.608
band73	285.809	257.759	263.621	260.04	374.138	294.15	310.523	309.239	312.778	354.951	337.875	442.551	303.503	389.477	258.292	256.158	322.796	266.815	331.661	346.604	253.981	337.949	306.057	288.981	358.026	317.906	364.097	338.115	315.852	302.301
band74	285.989	263.573	262.813	258.427	374.73	296.291	308.139	310.904	313.744	354.451	336.829	445.179	305.503	381.152	255.464	259.822	318.76	266.294	331.191	347.648	256.919	338.285	303.663	287.398	364.506	319.992	363.337	339.866	316.102	302.906
band75	286.64	257.992	264.483	263.97	374.979	296.841	309.822	306.066	312.291	354.537	334.764	442.184	307.306	379.842	256.146	262.838	324.25	268.458	334.698	348.123	256.527	337.281	306.997	288.586	367.37	320.72	360.462	339.19	316.549	302.762
band76	284.753	258.259	265.336	258.877	373.765	295.324	309.656	309.155	311.035	354.286	336.63	440.411	300.916	383.693	257.318	260.073	320.393	266.176	332.967	345.07	254.522	338.717	304.446	288.721	366.325	321.316	362.955	339.189	315.724	302.045
band77	286.992	258.766	261.504	259.69	375.481	293.073	309.973	307.089	309.783	354.016	332.409	441.324	302.54	378.935	254.179	257.986	320.219	266.816	333.416	349.005	255.009	338.171	303.697	287.806	353.455	320.372	361.236	337.267	314.65	301.637
band78	284.899	256.285	258.226	258.953	374.129	294.97	309.114	310.174	311.441	350.858	333.775	441.063	299.922	388.279	257.259	255.288	320.714	264.922	334.079	342.336	255.222	337.759	306.609	285.566	357.955	318.599	363.608	337.681	314.632	300.905
band79	287.747	259.279	264.919	260.712	374.534	292.989	307.928	304.788	308.489	356.36	335.244	444.139	305.483	380.415	263.659	258.677	320.513	269.529	333.231	348.939	258.766	336.439	303.032	290.381	360.357	316.013	357.462	336.965	315.607	301.775
band80	283.381	257.39	262.372	260.624	376.149	294.706	305.874	305.803	310.547	355.351	333.197	442.744	301.312	378.721	259.905	256.17	319.122	264.433	333.427	344.824	253.508	335.363	300.317	288.484	356.857	320.377	362.917	336.887	314.313	301.22
band81	282.584	254.207	260.821	259.96	374.338	291.483	307.486	304.643	307.998	353.782	331.872	442.353	299.468	385.04	257.244	258.925	318.969	265.674	333.185	348.244	255.808	334.032	301.882	283.885	355.318	315.906	357.618	333.72	313.444	299.73
band82	286.698	258.667	263.338	258.934	375.305	290.625	305.96	304.254	309.063	351.727	334.803	441.936	300.881	379.307	255.551	254.511	319.62	264.944	334.559	344.733	256.64	337.014	300.551	287.3	357.662	317.748	358.455	335.817	313.807	300.457
band83	279.443	255.974	264.051	259.142	375.66	294.191	306.71	302.577	307.74	353.656	332.561	444.749	297.331	377.186	260.103	253.97	316.888	268.429	335.505	346.702	252.13	335.575	303.994	286.98	355.273	318.754	357.564	336.942	313.564	299.915
band84	279.005	254.079	261.306	257.807	376.343	292.155	307.05	304.576	307.64	351.062	330.531	441.37	297.298	379.282	260.033	256.915	320.161	263.381	332.426	347.465	253.793	334.668	304.153	284.121	358.877	313.037	358.267	336.966	312.992	299.102
band85	281.2	253.71	260.462	259.615	373.446	290.88	306.205	303.743	306.071	349.32	330.865	439.134	294.955	380.05	249.2	253.675	317.286	261.276	329.497	344.127	250.874	335.05	297.522	281.701	347.403	314.196	359.493	334.036	310.893	298.465
band86	283.544	255.271	261.462	257.372	375.712	291.417	305.258	302.802	306.936	353.758	330.557	443.449	297.01	380.245	254.431	253.414	316.306	263.597	332.328	344.458	251.533	334.966	298.979	285.15	352.13	316.589	353.394	335.75	312.065	299.353
band87	280.972	253.549	259.745	256.385	377.761	290.282	305.085	300.979	308.314	349.242	329.574	438.73	295.339	380.715	254.815	251.598	316.25	258.73	328.626	344.75	247.659	334.806	299.949	283.326	353.922	316.404	358.71	336.04	311.152	298.231
band88	281.712	255.325	259.772	252.527	376.292	289.73	303.528	302.185	307.475	351.193	329.751	440.355	297.4	379.17	253.921	254.706	316.316	260.795	331.732	345.594	251.578	335.964	296.496	281.85	351.104	314.096	362.474	333.623	311.309	297.974
band89	278.426	250.793	256.794	255.856	376.704	289.759	303.535	300.654	305.009	353.542	329.056	441.096	298.427	376.492	255.287	254.98	318.372	261.821	332.721	346.406	250.588	336.912	297.608	281.804	359.474	315.843	354.724	332.643	311.262	297.107
band90	279.34	251.811	259.219	251.535	375.365	288.392	302.408	300.475	305.894	349.324	330.051	436.442	293.778	378.678	250.274	253.306	314.449	256.604	329.692	340.178	245.84	334.702	297.361	281.418	351.227	313.102	359.75	333.795	309.443	296.376
band91	279.439	253.338	261.047	255.194	375.377	288.451	303.103	299	304.785	350.303	328.972	438.649	294.752	378.505	253.331	254.686	313.477	259.709	329.158	345.461	250.578	334.951	296.681	281.998	349.5	317.545	356.894	334.927	310.35	297.004
band92	277.978	250.753	258.46	257.806	378.54	289.843	301.616	300.701	305.031	352.407	327.704	438.907	293.803	378.229	256.056	255.187	314.247	259.88	332.807	343.947	250.239	337.059	295.023	283.967	348.844	317.166	357.509	336.709	310.729	297.314
band93	277.761	249.821	261.196	251.804	375.647	287.876	299.922	299.987	304.52	352.158	330.382	438.256	292.45	379.941	250.395	248.249	314.52	256.83	327.099	342.228	250.699	333.115	295.763	282.515	355.201	313.658	359.309	334.574	309.496	296.069
band94	276.74	251.514	256.894	252.164	375.504	287.132	299.919	298.606	302.97	349.333	323.708	438.387	293.372	377.418	252.582	251.84	313.536	259.478	333.554	343.784	247.772	332.377	293.882	280.069	349.312	314.542	357.738	332.345	308.802	295.078
band95	278.932	252.148	256.204	254.168	375.478	287.461	299.517	297.595	301.305	349.491	327.466	437.314	296.035	374.17	252.859	252.982	315.398	258.744	334.571	344.174	250.158	330.842	294.389	281.893	353.545	315.965	354.642	330.429	309.21	295.23
band96	278.788	251.795	255.806	251.775	375.116	286.156	299.939	300.051	303.011	345.712	326.225	434.977	291.819	377.904	249.128	249.598	313.495	254.138	330.386	341.201	246.002	334.108	294.606	278.976	347.383	313.519	355.677	333.046	307.869	294.815
band97	274.912	249.263	256.674	248.853	375.382	286.431	300.478	298.222	302.185	346.464	327.46	431.744	289.207	376.759	253.81	248.832	314.247	254.697	330.58	342.071	247.081	332.718	292.484	278.732	345.513	312.775	361.882	329.698	307.47	293.886
band98	276.597	248.948	253.145	249.04	375.107	284.827	299.287	296.561	301.842	343.653	324.729	434.069	295.053	376.861	248.464	253.661	312.895	255.179	330.112	342.684	247.974	333.977	290.982	278.646	351.006	312.534	356.771	331.731	307.369	292.901
band99	277.767	246.985	256.043	249.087	373.428	285.032	297.516	297.778	300.088	346.936	328.343	431.967	290.871	376.139	249.182	248.87	312.967	252.466	329.826	343.29	246.458	331.402	291.714	278.348	349.201	311.129	353.075	329.653	306.627	293.066
band100	276.946	246.492	254.343	244.843	373.038	284.878	296.885	296.369	300.824	346.398	325.974	432.315	293.653	374.994	247.854	248.779	312.395	253.767	330.41	341.168	246.262	331.712	290.188	276.718	351.636	308.746	357.608	329.946	306.255	292.102
band101	270.919	243.895	256.215	247.677	373.048	284.425	298.426	291.64	299.067	347.547	324.078	432.047	290.287	370.734	247.264	249.521	312.316	251.602	329.566	341.432	243.166	331.759	290.988	276.019	349.948	312.524	353.974	329.999	305.36	291.286
band102	273.417	245.282	254.289	249.772	374.138	284.175	297.473	294.026	299.613	344.721	324.464	431.382	290.534	372.563	245.421	252.566	312.492	250.128	330.246	341.558	245.024	328.341	292.296	277.498	346.779	309.283	352.797	329.594	305.353	291.691
band103	273.478	245.763	253.762	248.838	372.317	281.664	294.728	293.447	299.464	342.293	319.897	428.477	287.528	374.248	247.697	247.943	307.069	252.826	330.137	340.603	246.635	329.17	290.002	273.923	346.11	310.454	354.132	328.187	304.314	290.575
band104	273.626	247.473	251.274	246.635	372.464	282.045	295.529	294.849	299.182	344.133	321.379	428.95	286.719	374.74	241.79	247.16	311.245	249.789	327.889	339.081	243.207	333.49	287.386	275.27	341.494	310.61	354.031	329.636	303.967	290.721
band105	274.668	245.167	251.76	248.333	371.177	279.829	297.764	293.352	297.377	343.487	323.335	433.126	286.729	374.269	244.964	249.018	311.209	252.572	325.31	339.666	244.023	328.185	289.671	273.526	340.201	306.72	355.474	326.653	303.842	290.291
band106	273.634	242.905	254.251	248.498	372.382	278.649	296.586	295.917	298.32	343.16	321.607	431.53	289.501	376.529	247.362	249.363	311.837	251.487	328.132	341.402	245.049	327.833	288.72	275.66	347.117	308.04	354.991	327.284	304.562	290.43
band107	272.805	246.705	251.034	247.639	373.398	282.542	297.865	296.604	298.566	343.846	322.217	430.889	284.166	375.455	246.626	247.631	314.735	251.456	330.588	339.201	244.891	331.012	291.25	275.854	339.87	309.094	353.608	329.257	304.6	291.1
band108	271.651	243.999	250.913	246.289	372.374	282.537	298.577	298.129	300.689	342.485	320.377	430.633	286.945	374.904	245.254	246.239	313.786	248.791	325.614	338.666	240.625	330.338	295.181	272.965	345.11	308.609	355.302	328.327	304.118	290.764
band109	272.329	244.7	248.174	245.078	372.402	280.847	297.884	297.756	298.705	339.821	321.896	428.488	287.191	378.149	243.803	243.288	315.337	247.858	327.377	336.304	240.38	331.252	292.551	272.193	346.175	308.168	355.465	325.234	303.529	289.77
band110	269.278	242.025	249.553	241.192	371.36	279.926	297.509	298.307	300.84	340.34	318.943	428.275	287.226	380.954	241.746	245.564	317.76	247.353	325.659	336.305	241.418	330.106	294.297	270.287	341.032	307.422	358.535	327.724	303.248	289.033
band111	271.795	240.995	249.045	242.32	372.472	279.726	297.401	296.667	300.441	339.79	319.48	424.203	286.608	379.344	246.526	243.191	315.566	245.422	325.568	337.044	236.861	332.053	292.724	272.364	338.623	308.743	358.434	325.718	302.826	289.065
band112	271.223	237.76	246.691	245.889	372.837	278.152	298.719	300.253	300.289	339.874	318.416	425.75	284.852	380.61	242.482	242.584	318.133	248.887	326.878	336.748	240.465	328.856	294.08	269.414	336.461	306.709	362.269	325.485	302.884	289.169
band113	269.921	239.71	247.251	244.746	372.794	278.22	299.005	298.938	300.271	341.582	317.568	426.646	282.63	384.567	245.028	244.077	318.872	245.41	327.396	335.54	233.789	330.952	296.337	269.664	343.24	306.649	361.623	327.109	303.198	289.244
band114	266.678	239.437	245.9	243.694	373.289	280.361	300.741	301.676	301.419	339.709	318.511	425.619	284.092	384.102	243.664	241.434	320.702	246.961	327.792	337.395	237.868	331.631	296.008	269.307	343.799	307.858	365.623	325.598	303.602	289.29
band115	268.912	237.568	246.86	244.748	375.031	279.532	303.412	303.109	302.749	340.802	316.377	428.598	282.31	383.969	238.472	242.935	320.615	244.898	327.451	339.243	237.625	333.038	297.577	270.083	337.649	310.788	366.031	328.845	303.901	290.272
band116	265.705	239.497	244.819	245.847	376.295	280.686	303.304	303.276	304.089	343.157	316.959	428.697	285.764	389.173	240.051	245.998	324.806	246.321	329.875	339.989	240.953	333.04	297.135	270.813	345.045	311.883	367.776	330.807	305.42	290.668
band117	267.281	232.718	244.057	246.692	376.99	282.339	303.574	305.183	305.468	341.788	317.476	427.858	282.659	386.115	238.174	244.138	325.092	246.391	325.97	339.867	238.62	335.674	297.977	268.892	342.279	312.104	365.976	329.78	304.683	290.609
band118	268.563	239.426	243.587	245.426	376.97	281.6	305.804	305.54	304.983	339.3	316.927	424.99	281.117	387.762	239.685	242.047	324.691	245.278	330.529	340.653	238.224	335.112	297.025	268.284	340.195	309.58	367.538	332.016	304.745	291.12
band119	265.857	236.863	242.643	245.61	379.511	280.93	306.214	306.721	306.987	340.603	319.734	428.435	282.203	391.762	243.01	241.394	322.258	244.718	331.436	341.872	236.64	336.176	300.199	270.458	342.455	312.153	374.389	331.267	305.803	291.194
band120	267.036	235.203	244.862	247.585	382.553	282.526	308.131	304.84	308.855	342.912	318.774	431.314	283.308	392.777	243.951	245.817	327.676	246.874	332.587	341.485	239.377	338.035	299.299	269.016	343.818	313.883	373.323	332.75	307.092	292.45
band121	264.284	235.579	243.147	248.061	383.095	283.165	308.107	307.448	309.285	342.323	317.872	432.136	286.715	391.415	243.3	244.339	327.505	247.149	334.257	342.812	243.431	339.884	300.251	268.856	345.448	315.241	372.575	334.297	307.571	292.449
band122	264.679	233.244	245.374	248.756	384.604	283.818	310.348	308.392	309.038	342.879	320.456	430.828	286.236	395.164	241.951	246.245	329.788	245.77	336.714	343.792	238.927	339.396	304.346	269.26	343.753	315.117	374.672	335.314	308.174	293.113
band123	264.605	232.293	247.719	251.064	386.455	286.875	310.436	310.502	308.807	345.455	320.866	434.296	287.45	396.935	245.292	243.74	333.071	245.843	338.796	346.12	239.443	340.483	303.654	269.395	344.169	318.725	378.302	334.146	309.462	294.421
band124	263.208	230.805	247.896	250.567	387.696	287.599	310.536	312.498	313.488	348.013	324.91	437.143	291.595	399.588	247.238	248.596	332.605	249.189	338.19	347.959	242.418	343.754	304.145	271.925	346.156	319.526	381.153	338.199	311.307	295.23
band125	265.853	237.663	244.27	251.501	388.638	285.29	310.727	312.751	312.854	348.866	323.907	440.307	291.86	401.294	248.646	246.978	333.23	250.225	339.156	348.463	242.467	343.5	303.974	274.51	348.76	318.877	379.139	338.247	311.855	295.841
band126	266.743	238.518	250.623	252.604	391.764	287.674	311.096	313.706	314.985	351.172	327.694	438.638	291.561	402.721	245.508	249.895	335.265	249.22	342.424	351.115	242.049	348.048	303.835	272.781	348.097	319.406	385.274	342.429	313.387	297.889
band127	266.94	237.004	248.202	253.096	393.72	289.479	312.859	316.579	316.419	352.66	327.94	444.397	292.848	402.248	249.859	248.712	335.003	251.515	343.491	353.444	246.241	350.185	304.701	274.769	353.396	325.583	383.509	344.554	314.977	298.696
band128	269.127	241.318	250.938	253.037	398.207	293.071	315.316	318.05	317.832	356.284	330.774	448.651	296.326	408.724	249.292	248.002	336.778	252.895	345.26	358.287	246.356	353.023	308.787	275.935	355.201	326.551	388.785	346.02	317.458	301.318
band129	268.412	238.558	254.451	258.182	400.785	293.565	316.295	319.062	320.207	359.408	333.218	450.518	300.117	413.003	250.6	251.499	337.607	255.85	352.466	361.296	244.307	354.957	309.152	278.709	361.117	327.906	389.064	346.704	319.536	302.893
band130	274.313	244.303	254.687	260.792	403.519	296.145	319.639	322.561	323.116	361.448	334.954	454.531	300.31	413.83	252.238	254.3	341.643	257.012	354.495	364.806	252.202	357.513	310.352	280.953	365.208	332.206	398.2	352.155	322.765	306.052
band131	275.521	246.116	257.864	262.966	409.105	298.815	324.686	325.123	326.546	365.534	340.165	461.85	301.197	417.771	257.074	259.803	344.995	261.596	358.762	368.667	254.006	360.937	315.553	284.899	368.604	334.083	396.745	354.22	326.186	309.228
band132	278.538	247.275	257.636	265.666	412.947	302.72	327.127	328.236	329.037	369.785	342.311	463.039	304.671	423.347	256.995	258.292	348.321	261.227	361.416	371.434	254.269	364.57	316.605	286.237	369.805	337.027	407.552	356.176	328.652	311.897
band133	277.955	247.427	262.832	266.361	417.021	302.767	328.296	332.037	333.257	371.658	344.793	472.279	307.733	423.375	259.641	263.811	351.138	264.648	366.166	375.541	255.665	368.029	318.934	289.728	375.721	341.254	408.84	361.668	331.735	313.961
band134	282.974	251.097	264.936	265.308	420.398	304.739	332.271	334.681	337.08	377.843	352.214	475.029	313.649	435.341	265.508	263.848	353.365	266.485	368.005	380.07	258.921	369.368	321.882	294.148	378.643	343.196	411.094	362.494	335.164	317.133
band135	287.344	253.879	268.109	269.436	423.586	306.806	336.273	336.975	336.816	380.221	352.613	482.305	315.52	435.536	262.9	266.174	358.74	268.462	372.406	379.713	260.19	373.89	327.665	295.529	384.338	346.891	412.8	366.859	337.928	319.945
band136	288.712	255.699	267.472	274.915	429.077	310.375	337.094	341.486	342.427	385.063	357.098	486.872	318.203	443.69	267.182	270.284	360.778	272.438	377.375	387.817	262.782	378.061	329.136	297.045	388.097	350.869	419.066	370.663	341.778	323.232
band137	294.295	257.29	270.87	276.367	434.682	314.895	345.337	345.694	345.254	391.395	361.979	493.502	322.45	444.012	269.89	271.061	369.628	275.137	380.768	390.75	264.288	383.324	331.574	300.163	393.877	353.808	425.559	375.343	345.828	327.608
band138	296.726	263.168	277.985	276.154	438.909	318.012	346.769	350.511	349.28	392.592	366.761	497.427	324.07	453.062	273.751	269.456	371.401	274.776	383.1	394.742	265.427	387.805	335.27	307.561	395.234	356.11	431.538	379.556	349.184	331.011
band139	299.825	263.689	280.136	280.993	445.537	321.716	350.93	354.307	354.385	394.737	370.789	504.603	331.881	456.232	275.246	276.696	374.13	277.563	389.927	400.534	271.213	392.644	338.945	309.138	397.799	364.585	436.498	384.288	353.535	334.626
band140	299.907	265.968	280.019	279.658	448.338	321.433	354.64	355.234	355.989	398.934	370.952	506.312	329.501	462.808	272.605	279.166	377.663	280.35	393.303	404.553	274.706	394.481	340.504	310.018	405.61	362.621	439.368	385.512	355.363	336.012
band141	299.957	266.101	283.009	283.524	451.253	325.114	355.346	358.909	360.432	403.528	375.699	512.452	333	465.82	276.815	279.897	382.01	283.676	395.76	407.277	276.422	396.001	345.421	313.875	406.403	367.696	442.007	387.94	358.405	338.717
band142	301.161	266.81	282.962	283.228	452.954	325.195	358.503	362.04	360.965	406.263	375.788	514.262	334.468	470.412	283.877	281.627	384.329	285.039	396.793	409.297	277.55	400.979	344.796	315.466	411.747	365.562	445.233	389.73	360.251	340.008
band143	304.963	269.544	285.777	291.214	457.654	328.728	357.839	362.082	362.508	406.968	378.275	514.414	336.602	468.046	278.659	281.436	385.816	285.723	400.232	413.765	276.556	402.298	345.04	314.423	409.227	372.842	446.818	393.014	361.802	342.728
band144	308.902	271.723	288.396	289.468	461.296	330.151	361.102	365.665	365.36	408.613	381.407	520.914	341.101	473.641	286.392	280.55	389.957	289.475	401.214	414.94	280.141	406.025	347.96	317.888	410.156	374.843	452.361	394.38	364.787	345.068
band145	306.056	269.933	285.738	288.667	463.112	331.138	362.331	366.903	366.298	409.772	381.127	523.85	339.943	477.276	282.154	284.189	390.76	287.114	404.855	416.569	279.695	407.288	348.496	315.096	412.708	374.296	452.486	394.223	365.074	344.995
band146	308.271	271.567	287.596	289.719	464.144	333.289	364.304	367.866	367.997	413.955	385.336	528.212	342.752	479.724	288.305	289.16	388.832	290.291	408.299	420.806	280.748	405.585	348.014	320.944	414.169	376.7	452.719	397.969	367.403	346.871
band147	308.794	272.855	288.379	292.655	466.844	332.694	366.35	369.896	369.16	415.466	385.081	528.93	341.745	477.944	284.077	286.493	392.742	290.468	408.294	422.009	282.623	408.014	352.268	319.774	414.987	376.489	459.594	399.821	368.373	348.309
band148	312.547	273.293	291.77	296.051	469.479	336.65	368.023	371.633	371.965	416.097	390.954	532.744	345.074	484.084	291.608	288.333	392.722	293.624	413.513	427.826	281.644	411.214	352.228	324.248	420.727	381.112	460.566	401.757	371.482	350.751
band149	313.271	272.716	294.828	295.621	472.518	335.621	369.268	372.898	373.545	419.79	388.816	535.468	346.663	485.365	285.133	289.156	394.314	291.737	413.949	427.242	284.563	412.51	353.779	323.549	422.396	380.906	465.672	404.993	372.368	352.008
band150	315.198	277.29	294.93	297.867	474.975	339.064	371.231	375.094	377.138	422.921	393.376	540.034	347.22	487.539	291.587	295.586	399.247	293.922	416.821	428.884	287.331	417.269	354.081	325.919	426.487	386.89	467.785	403.877	375.342	354.571
band151	315.253	276.99	295.702	297.234	477.239	338.597	372.649	377.365	378.426	424.888	394.167	538.855	345.012	490.359	293.418	289.369	401.352	295.875	416.732	432.167	285.529	416.039	355.245	329.129	428.448	384.88	468.005	405.516	375.873	355.434
band152	314.428	277.195	295.919	298.387	477.682	339.85	372.058	377.023	378.912	423.436	394.92	537.979	344.248	490.988	286.292	291.775	401.832	294.928	419.841	432.419	283.938	419.208	357.066	324.72	425.117	385.23	472.417	406.785	375.878	355.489
band153	317.871	278.268	296.389	298.981	479.831	340.194	373.268	380.84	382.054	426.719	398.734	545.349	351.68	494.582	294.128	293.602	400.112	296.674	420.795	435.614	290.266	419.741	357.077	328.941	432.695	388.567	473.281	408.674	378.747	357.442
band154	321.09	282.219	299.019	301.474	483.062	343.71	374.836	381.245	383.315	429.355	402.433	547.833	355.951	495.183	294.197	298.221	406.334	299.311	424.269	438.888	289.038	421.983	358.429	330.407	427.89	390.018	478.116	410.529	381.013	359.932
band155	319.005	282.577	301.036	303.314	483.513	341.917	377.847	382.832	384.432	430.658	401.821	548.002	350.725	497.663	291.605	296.408	405.003	300.783	423.233	439.989	292.113	423.216	361.406	330.623	431.591	393.158	476.712	411.628	381.529	360.713
band156	322.895	281.97	298.009	300.645	485.723	343.355	376.498	386.424	387.921	432.319	406.093	550.46	356.926	501.282	297.221	296.158	409.477	300.06	423.925	443.284	293.603	423.576	360.885	332.579	439.305	391.518	479.375	412.154	383.344	361.576
band157	322.558	284.721	302.14	305.035	489.285	346.705	379.664	387.843	389.343	432.492	408.405	555.565	356.832	502.062	297.146	299.947	412.105	301.747	429.735	443.991	295.352	426.727	363.368	335.969	442.87	394.535	483.873	416.482	385.946	363.979
band158	320.488	282.085	303.611	307.788	489.239	345.479	382.558	387.663	389.916	436.058	406.356	554.144	359.304	499.232	294.008	301.838	410.742	304.002	431.257	444.775	297.998	425.787	365.386	335.363	437.844	396.262	486.517	415.998	386.132	364.488
band159	320.321	283.274	302.691	305.492	490.162	347.603	383.966	388.52	392.175	436.186	407.954	557.299	359.624	506.127	298.462	303.349	414.605	304.147	433.587	445.716	296.232	428.869	361.959	335.048	440.597	397.069	490.019	419.216	387.51	365.039
band160	322.803	283.186	303.043	307.225	489.931	348.903	382.843	390.493	392.858	435.78	409.425	557.8	356.487	506.158	296.954	302.564	414.286	305.713	432.722	446.556	295.567	430.75	363.57	336.621	437.117	399.891	488.858	418.197	387.725	365.707
band161	321.802	288.211	305.094	306.049	491.071	347.993	384.238	392.309	395.057	437.922	412.178	560.754	362.413	507.625	297.892	302.365	414.569	305.639	433.569	447.786	295.678	430.201	364.472	338.11	435.708	397.998	490.665	419.323	388.81	366.975
band162	324.812	288.293	303.13	309.522	493.046	348.843	384.264	392.261	397.606	439.278	411.715	561.754	363.16	510.155	300.077	302.477	416.538	305.39	437.29	449.286	300.041	432.719	366.574	336.252	447.825	400.377	496.771	422.916	390.799	368.106
band163	324.158	286.529	304.491	310.946	495.66	350.922	386.68	397.188	399.493	440.989	412.754	562.821	362.686	512.536	299.092	299.284	419.612	304.521	434.204	451.398	296.61	432.534	366.87	339.468	448.571	401.8	498.25	422.616	391.524	369.706
band164	324.777	288.395	305.081	309.994	497.381	350.215	387.65	398.491	401.52	440.968	413.128	564.01	360.938	515.774	300.644	303.592	418.696	305.083	439.798	450.645	297.61	434.246	368.196	337.392	446.942	407.696	497.958	424.904	392.562	370.447
band165	331.794	291.379	306.762	309.936	499.546	350.253	388.39	399.247	401.716	444.981	416.305	564.629	362.111	515.111	305.203	302.744	421.684	309.305	438.769	452.193	298.895	435.532	369.772	340.225	452.864	405.843	500.007	424.16	394.263	372.4
band166	329.313	290.499	308.138	315.425	499.429	351.996	393.253	400.71	404.238	444.7	417.853	566.172	361.084	516.402	299.874	307.103	423.13	307.838	440.923	454.396	300.736	435.383	372.675	340.482	445.312	405.147	503.92	425.417	395.055	373.77
band167	331.749	289.103	310.715	310.354	499.352	349.788	391.172	404.354	404.858	444.94	416.94	568.783	367.446	518.653	302.787	305.886	425.135	307.493	441.642	455.644	299.023	437.201	371.917	342.309	456.227	407.925	507.342	424.493	396.187	373.639
band168	326.895	290.107	311.617	312.692	498.75	352.186	391.256	400.728	405.237	445.578	418.581	568.84	363.339	515.904	300.536	306.957	424.712	307.774	443.039	455.427	297.797	436.596	370.542	342.219	449.636	405.113	504.113	425.973	395.434	373.505
band169	329.679	290.096	307.966	313.968	500.123	351.806	391.913	402.132	405.765	447.617	418.85	569.002	363.93	520.669	300.718	310.339	422.436	310.799	441.09	455.854	300.708	437.466	369.15	341.743	448.643	406.933	503.981	427.297	396.095	374.106
band170	328.873	290.685	310.381	315.587	502.331	352.59	392.197	403.121	407.553	445.895	419.185	569.201	366.014	519.551	304.803	305.4	423.046	309.319	444.71	459.813	301.58	437.132	373.112	342.755	448.916	407.308	505.535	427.252	396.923	374.921
band171	332.538	293.282	308.196	315.583	504.982	354.648	394.994	405.852	410.844	448.666	423.746	571.949	369.626	522.433	303.844	309.347	428.069	311.863	445.879	462.085	300.618	439.445	373.813	344.485	455.552	410.367	508.311	430.176	399.328	376.958
band172	333.039	290.449	308.511	318.193	506.276	354.617	396.464	409.168	411.249	449.613	421.359	574.471	370.897	527.127	302.479	307.426	427.327	313.03	447.258	461.898	306.815	438.323	374.844	345.088	452.37	411.42	510.373	429.562	399.987	377.758
band173	333.307	292.808	313.377	318.487	508.377	354.182	397.369	409.729	413.002	452.325	425.336	577.484	370.405	528.099	306.179	309.858	425.816	313.063	447.268	465.959	304.763	441.849	374.926	346.687	458.403	411.542	512.068	431.063	401.562	379.296
band174	333.16	293.741	312.7	320.483	507.957	356.693	397.216	407.929	414.598	452.141	425.728	578.02	370.589	530.443	303.544	312.318	432.153	313.509	450.986	464.208	307.556	442.995	373.994	347.15	457.584	414.891	514.344	431.514	402.434	379.662
band175	333.684	290.712	311.177	318.9	509.313	356.258	394.775	410.136	415.524	453.315	425.491	577.18	368.624	528.709	305.803	311.15	426.844	313.195	452.35	465.363	302.561	444.201	373.461	347.501	456.039	415.019	513.934	433.131	401.941	379.379
band176	331.516	295.911	314.926	318.549	506.676	353.878	395.988	409.379	415	455.961	427.046	577.174	371.094	530.734	307.344	312.458	429.811	313.724	449.663	464.368	306.217	441.56	374.74	347.949	463.026	410.022	514.455	430.928	402.504	379.778
band177	333.757	293.479	310.864	320.423	507.767	356.844	396.161	408.877	414.428	454.385	426.638	577.602	373.273	523.415	305.764	314.803	432.926	315.233	448.598	465.897	306.593	441.499	372.594	345.709	460.182	415.058	509.535	431.029	402.262	379.698
band178	332.259	290.492	313.498	319.626	506.487	354.949	396.602	409.748	415.709	451.386	424.811	578.713	370.723	525.74	309.215	312.42	433.939	314.032	450.028	464.733	305.791	440.697	373.945	346.41	462.104	412.821	512.934	433.055	402.245	379.076
band179	335.442	292.878	314.849	321.801	509.213	356.376	397.688	412.516	418.164	453.813	425.436	577.697	370.528	530.251	306.813	312.323	432.592	314.378	451.448	467.718	305.868	442.247	372.219	347.476	462.325	414.674	512.882	428.94	403.163	381.274
band180	335.234	293.537	313.757	320.436	509.378	355.306	397.522	411.155	417.085	455.431	429.309	579.413	373.727	527.325	309.5	315.136	432.773	316.534	453.375	465.151	307.363	442.56	374.979	348.44	459.851	414.417	515.434	432.904	403.822	380.884
band181	332.205	295.949	316.598	324.278	509.78	356.096	396.975	412.38	417.7	455.311	431.634	582.709	374.706	528.149	306.146	317.3	434.204	315.293	450.82	470.024	309.612	443.991	376.176	348.868	464.838	412.732	515.861	432.182	404.733	381.727
band182	336.753	294.762	315.177	323.007	509.768	358.6	397.379	414.591	418.803	457.986	429.581	580.756	373.62	534.749	305.072	316.087	433.227	314.116	454.747	469.807	310.637	444.295	374.858	348.956	465.019	415.826	512.38	433.193	405.134	382.683
band183	336.392	296.356	317.774	324.614	510.27	357.078	396.572	413.306	419.997	459.727	431.57	582.135	375.754	531.567	307.144	315.767	432.459	316.464	452.53	470.862	309.418	441.701	375.798	350.58	467.097	414.158	517.064	432.603	405.598	383.209
band184	337.811	295.19	317.147	322.217	510.887	357.985	399.186	416.705	422.395	457.271	432.613	582.093	373.657	533.963	309.144	315.359	433.168	317.823	455.776	470.074	308.132	444.433	376.816	351.654	464.747	413.607	520.507	433.876	406.223	383.679
band185	340.505	298.807	318.383	328.052	510.432	358.753	400.674	417.051	422.794	459.011	435.926	584.479	376.819	535.161	315.949	319.613	435.962	319.623	457.654	473.143	312.458	443.305	376.346	352.825	468.091	415.099	517.941	432.757	408.129	385.446
band186	336.527	297.712	319.243	326.068	512.004	360.668	401.486	419.204	423.782	461.567	435.506	586.628	374.22	534.879	315.795	321.503	438.923	320.4	459.752	475.33	311.281	445.925	378.835	352.42	467.39	416.669	518.408	436.226	408.87	385.826
band187	341.161	300.011	321.54	328.443	512.844	361.299	401.803	420.599	426.772	460.781	435.356	586.072	379.908	536.774	313.749	323.385	437.49	320.823	459.14	477.801	312.913	445.482	380.279	355.119	469.656	418.035	525.224	439.099	410.413	387.525
band188	341.45	301.644	320.794	328.736	514.218	362.397	402.387	422.89	427.833	462.818	439.04	587.611	378.166	535.591	311.39	324.596	439.102	323.649	458.59	476.152	315.554	448.748	379.167	354.008	466.727	420.497	521.686	438.473	410.854	388.517
band189	340.634	303.112	321.504	330.96	515.096	363.322	404.217	424.468	427.755	461.592	438.66	588.665	379.916	538.149	312.721	324.905	443.431	324.817	462.106	479.865	318.701	448.039	383.798	355.687	467.078	422.712	520.507	439.28	412.203	389.266
band190	345.462	306.581	322.494	332.946	516.127	365.21	407.659	424.335	432.224	463.391	440.833	591.287	383.275	543.186	316.71	323.576	447.653	324.82	463.556	480.777	319.341	452.676	382.835	356.094	471.643	421.716	524.394	441.041	414.351	391.643
band191	345.13	305.46	327.302	333.95	517.602	366.908	407.35	429.266	433.972	465.26	443.742	590.342	381.52	546.74	316.967	326.568	445.969	326.577	465.012	480.157	322.021	453.23	384.933	361.215	477.188	425.676	527.698	446.793	416.234	393.22
band192	346.665	309.033	327.855	334.554	520.604	368.703	409.428	430.751	437.861	468.141	445.281	592.329	384.626	548.146	318.036	329.026	450.406	328.461	462.385	481.761	319.105	453.918	388.753	360.765	474.273	425.003	533.993	446.157	417.715	395.36
band193	349.84	311.971	328.043	340.328	522.373	373.058	412.347	434.658	442.025	472.918	449.195	596.44	387.906	552.882	323.592	332.075	454.036	332.649	468.81	486.753	329.32	458.443	390.828	363.081	477.76	430.067	535.632	450.539	421.699	398.756
band194	355.512	315.841	330.479	344.643	524.954	378.45	414.2	436.841	444.623	476.41	450.94	599.964	392.503	547.901	324.049	337.617	456.214	335.249	473.546	491.325	329.821	459.089	393.263	366.718	483.61	432.061	536.837	452.78	424.48	402.195
band195	354.532	320.592	333.511	346.965	528.655	380.28	420.218	442.693	448.978	478.414	458.477	604.005	393.082	559.641	327.79	337.927	461.362	340.317	476.48	492.828	331.815	464.343	399.231	370.491	485.221	435.471	543.486	456.541	428.334	405.484
band196	362.198	324.299	338.579	352.219	531.45	384.29	423.742	448.839	453.889	483.458	460.674	608.179	400.018	563.065	334.633	342.657	466.179	344.491	477.936	498.131	336.97	465.53	399.966	373.646	496.052	436.927	547.222	458.327	432.627	410.296
band197	362.893	325.377	342.234	357.514	534.015	386.977	428.385	454.356	457.949	486.357	464.722	609.041	401.047	566.241	335.146	347.006	472.227	347.373	483.125	499.807	337.29	470.981	409.845	377.896	499.825	441.155	549.226	463.983	436.143	413.606
band198	367.101	328.703	344.753	360.516	537.363	392.663	430.942	456.582	461.262	488.481	467.289	616.198	406.789	572.495	337.687	352.022	473.865	350.344	486.788	505.054	346.719	473.24	412.496	382.428	503.455	445.55	552.403	466.504	439.989	416.837
band199	368.251	336.547	347.891	365.189	541.484	397.944	437.189	464.046	467.737	491.72	471.204	618.299	408.064	573.48	342.097	356.726	481.814	353.476	487.391	506.718	346.928	476.693	416.553	385.657	506.468	452.955	551.884	473.07	443.838	421.8
band200	378.031	341.838	351.736	372.601	543.359	403.918	438.938	466.654	470.976	497.286	473.521	620.948	411.953	582.186	348.115	359.31	486.691	358.289	494.454	512.044	353.863	481.849	423.542	389.921	512.513	453.744	562.104	478.164	448.877	426.534
band201	381.15	347.663	355.468	377.455	547.82	408.867	444.171	473.112	478.559	502.821	483.531	626.157	419.133	588.381	353.172	370.286	491.151	365.396	497.414	517.512	359.608	485.517	430.76	393.384	518.24	458.605	565.271	482.132	454.383	431.709
band202	386.943	350.441	360.891	383.677	553.918	415.206	450.215	481.61	486.711	507.318	487.442	628.467	421.559	591.127	354.708	375.574	497.196	369.382	504.011	522.405	363.552	493.76	435.828	401.251	521.636	464.891	574.863	488.388	459.749	437.693
band203	392.857	359.903	367.536	391.88	559.526	421.645	458.024	491.791	495.822	516.817	495.613	639.251	429.784	600.48	365.249	383.726	505.474	378.319	509.177	529.619	370.107	498.252	444.911	406.466	528.649	471.153	581.382	494.091	467.411	445.58
band204	400.526	366.816	373.715	402.011	568.137	432.404	464.739	500.061	503.401	522.968	504.604	646.213	438.078	606.204	369.605	389.856	516.056	386.615	517.841	539.376	383.702	510.01	455.291	418.013	539.045	477.387	585.708	504.859	475.83	453.478
band205	411.479	376.408	384.338	412.676	574.048	442.728	474.7	510.518	515.398	531.594	510.006	653.206	447.214	620.663	377.279	398.091	526.395	395.13	526.884	546.924	387.38	516.586	463.593	425.051	546.636	485.085	599.061	513.443	484.733	463.389
band206	415.012	382.659	392.268	419.615	582.387	451.124	482.626	521.895	524.449	542.707	520.739	662.975	456.345	630.95	386.064	410.523	534.946	404.495	532.435	553.546	399.119	523.848	474.147	434.43	558.877	491.76	605.667	521.839	493.48	471.474
band207	426.281	393.725	399.713	431.842	589.651	459.356	492.168	531.08	534.02	551.907	528.819	671.881	466.511	638.266	398.233	416.176	543.98	413.196	542.854	564.974	409.168	531.431	482.979	444.164	569.221	501.887	615.002	530.615	502.825	480.974
band208	432.228	400.456	406.177	441.858	595.779	468.699	496.813	540.144	543.146	560.214	537.265	677.007	476.368	650.628	403.249	424.625	554.635	422.09	548.088	573.097	416.881	539.798	493.443	452.037	577.831	509.273	620.675	540.535	510.823	488.551
band209	442.798	410.897	414.245	448.681	600.975	476.809	503.982	547.471	552.007	568.029	545.96	686.112	478.91	657.724	413.533	437.237	563.296	430.103	555.064	578.153	425.476	546.873	501.977	460.628	579.87	515.246	627.807	547.897	518.492	496.59
band210	449.107	413.703	415.84	459.99	607.286	485.88	512.295	558.468	559.784	570.153	549.017	687.35	484.372	670.641	415.349	446.081	568.357	438.01	560.056	583.101	435.301	555.322	512.587	463.479	588.935	519.422	632.568	553.606	524.859	503.251
band211	454.981	425.21	426.56	470.731	612.721	494.211	520.698	567.683	570.832	579.276	560.744	696.264	495.269	674.774	428.551	454.911	578.202	446.487	570.242	590.245	443.531	561.533	521.855	475.082	602.234	529.872	645.429	562.628	534.313	512.29
band212	463.493	433.533	430.802	480.037	620.235	502.481	525.059	578.141	578.366	589.438	568.701	704.434	504.103	683.954	432.456	462.471	583.286	453.107	578.138	599.01	454.844	569.053	528.983	482.513	602.195	539.832	653.394	571.684	541.919	520.158
band213	472.453	441.816	439.462	491.041	628.267	513.469	536.185	588.026	588.248	594.759	580.295	712.156	508.251	695.613	443.162	472.061	601.737	465.367	582.419	607.311	462.03	580.963	539.538	493.279	615.805	548.49	662.554	580.384	551.612	529.373
band214	480.763	453.044	447.396	501.928	636.183	524.429	545.072	601.008	600.91	604.839	587.044	720.986	520.957	708.046	450.09	483.493	608.684	475.461	593.426	618.955	472.422	592.348	551.522	501.498	630.506	554.81	669.774	591.62	561.686	539.557
band215	488.518	459.795	453.621	513.623	644.472	535.728	554.986	611.314	612.561	612.288	595.809	730.396	532.185	719.545	463.992	493.862	617.25	482.204	603.344	624.613	480.55	599.843	561.343	510.065	635.273	564.075	678.309	601.934	570.768	548.69
band216	498.998	471.001	464.385	522.965	652.578	545.288	564.934	621.651	623.038	625.184	603.617	739.493	536.641	727.025	472.595	502.284	630.094	494.15	612.042	634.129	494.524	606.273	574.833	522.97	648.208	572.502	691.217	610.601	580.829	559.002
band217	506.679	480.564	473.753	537.105	661.306	555.676	572.289	631.496	631.551	629.479	614.117	747.989	546.216	736.124	479.828	517.343	636.997	504.71	618.796	642.862	501.507	618.895	583.622	529.084	648.896	585.605	698.297	620.235	589.679	567.99
band218	514.14	484.933	480.885	544.352	668.857	566.776	582.285	642.962	643.419	638.099	622.638	756.004	556.591	747.152	486.885	523.712	647.939	511.503	626.13	650.022	511.437	628.107	594.712	538.275	665.403	592.03	707.177	630.763	598.685	576.671
band219	522.27	494.112	488.311	556.071	675.295	573.957	589.729	653.007	651.806	648.264	629.323	761.311	563.074	756.316	497.349	535.105	653.906	520.006	634.083	660.223	519.797	634.688	600.368	546.113	673.766	598.671	712.925	637.745	606.7	585.282
band220	530.578	501.752	494.762	561.441	681.087	580.839	596.944	662.262	662.603	656.125	637.339	767.355	569.626	762.644	502.777	540.205	665.064	530.016	641.931	665.019	528.883	640.616	610.655	551.767	675.357	604.305	719.193	643.242	613.728	592.839
band221	537.231	507.1	502.085	571.468	686.54	589.112	604.496	672.025	669.239	658.962	645.541	773.585	577.797	775.146	510.672	550.217	673.273	537.83	646.828	670.502	534.337	646.502	619.279	561.416	689.11	614.182	729.068	651.373	621.604	599.826
band222	544.588	516.026	506.872	579.128	693.235	598.106	612.309	681.092	678.955	667.406	650.906	775.974	584.916	786.263	516.421	556.507	680.462	544.21	653.012	675.326	543.386	657.191	628.205	568.82	693.773	620.848	736.323	660.278	628.948	607.772
band223	550.802	525.678	511.76	586.695	699.002	606.056	619.846	689.042	686.5	672.791	658.087	784.038	588.396	790.563	522.833	566.225	688.855	553.736	658.978	681.032	551.175	660.483	634.199	573.864	693.162	625.633	742.797	667.385	635.343	614.817
band224	555.856	532.308	518.343	595.727	704.982	613.647	625.569	696.914	693.765	680.091	663.242	790.486	596.142	799.604	529.49	570.089	693.98	558	664.954	686.93	557.606	669.188	642.749	580.669	708.078	632.527	749.63	674.071	642.308	621.72
band225	562.426	538.907	524.2	601.344	708.808	618.217	631.885	704.252	699.875	684.579	669.207	796.028	603.953	806.415	532.938	575.172	700.469	565.759	668.873	693.265	569.139	676.827	653.242	586.923	712.481	636.527	753.649	678.206	648.342	627.449
band226	568.995	542.156	531.223	608.425	713.939	624.757	637.538	714.328	707.893	691.067	674.712	798.387	605.924	815.381	541.272	583.12	709.069	569.755	675.609	698.076	571.168	678.93	657.608	592.82	713.26	643.449	762.111	683.013	654.071	634.032
band227	572.403	550.385	536.477	619.954	718.413	632.151	645.412	720.812	717.012	693.349	680.809	805.491	614.357	822.873	548.328	593.826	718.829	577.125	680.441	704.95	579.751	687.393	664.469	598.605	725.448	651.558	764.149	691.786	661.305	640.637
band228	579.814	555.468	538.779	624.78	723.976	637.574	649.705	726.473	721.104	699.849	685.972	810.274	618.308	831.461	554.408	597.523	721.145	582.81	689.146	710.068	587.151	689.962	670.972	604.681	734.24	654.74	774.568	696.108	666.824	645.752
band229	581.071	560.416	543.489	630.913	727.522	645.201	655	734.155	729.623	702.198	689.068	812.43	623.491	835.387	559.108	604.499	728.168	590.411	693.449	713.939	590.367	698.872	675.501	608.328	727.188	663.01	777.328	703.682	671.565	650.959
band230	588.797	562.114	549.002	632.173	730.072	648.445	660.637	738.286	732.472	707.515	696.751	816.263	629.491	839.198	559.29	607.227	734.745	593.174	695.612	717.996	596.209	701.914	678.844	615.3	737.76	665.24	779.059	707.502	675.753	654.951
band231	591.724	564.612	552.228	640.915	732.899	652.777	662.691	745.55	738.044	709.762	700.712	817.771	631.236	852.424	567.362	613.231	734.987	598.517	698.853	721.14	601.712	704.373	685.828	617.961	746.656	664.973	785.542	709.483	680.142	659.12
band232	594.191	570.023	558.015	641.99	732.697	654.272	666.83	746.752	740.93	711.582	698.292	818.68	631.591	853.161	567.474	616.229	737.115	601.38	700.199	722.438	600.401	704.607	689.395	620.412	746.097	669.503	788.401	712.24	681.961	661.728
band233	595.521	570.26	557.764	647.182	735.352	656.063	667.853	751.398	743.554	714.702	701.332	821.05	633.561	850.95	572.795	617.966	739.931	603.608	700.649	724.997	607.049	707.221	692.095	621.191	744.448	670.15	785.927	714.035	683.879	663.965
band234	596.513	572.074	556.868	650.147	735.868	658.992	670.277	751.336	744.682	712.619	703.128	820.867	636.7	855.573	572.882	621.905	741.288	604.873	702.7	723.222	606.949	710.454	694.204	622.816	748.545	671.551	790.186	714.265	685.41	664.938
band235	603.225	576.686	561.509	648.782	736.412	660.514	670.005	754.791	747.495	714.763	705.88	818.342	636.99	857.845	576	621.805	742.365	608.489	702.584	727.989	612.951	710.458	695.173	625.129	747.649	672.433	787.193	716.358	687.136	667.418
band236	600.423	576.268	558.447	650.019	735.975	663.486	672.816	757.184	747.76	714.85	705.242	817.051	638.483	856.91	576.821	625.398	746.776	611.113	703.855	727.011	610.52	710.848	696.08	627.219	750	675.602	790.139	715.013	687.904	667.723
band237	601.062	573.429	562.381	652.514	735.447	664.727	676.104	760.44	749.824	716.552	708.326	818.525	637.618	860.111	578.644	625.233	745.745	609.815	704.348	726.392	612.54	712.198	697.859	629.738	753.981	675.061	792.684	715.423	689.169	669.248
band238	601.805	575.495	560.189	655.46	735.475	663.193	675.35	762.805	752.329	713.446	706.809	815.732	640.873	861.272	579.372	629.594	747.066	613.344	704.867	727.254	610.979	713.922	697.691	628.373	750.091	676.899	786.729	716.689	689.396	669.555
band239	602.926	577.89	562.136	653.868	733.922	662.902	675.432	762.52	752.088	713.091	705.546	817.977	638.111	858.173	577.585	629.162	746.423	612.819	704.752	726.626	614.348	712.288	703.003	628.569	755	674.439	790.854	717.056	689.625	669.678
band240	602.161	577.378	562.647	656.814	734.562	664.815	678.799	763.13	754.627	714.443	710.017	818.28	639.934	860.136	582.138	628.42	749.018	616.6	705.054	727.373	614.175	714.737	704.306	630.952	748.747	675.514	790.528	716.872	690.792	670.938
band241	606.056	580.478	563.4	659.46	734.014	666.003	678.126	766.863	754.353	713.472	703.776	815.871	641.06	866.557	581.931	630.884	748.679	615.462	704.178	726.723	616.661	713.261	702.21	631.55	753.351	675.802	789.868	716.484	691.305	672.222
band242	607.96	582.37	562.974	659.431	734.774	665.971	680.19	768.221	757.035	714.416	709.464	814.444	641.429	864.539	584.228	629.781	749.86	615.765	703.031	728.632	619.147	714.445	702.942	631.322	751.234	680.026	792.137	719.233	692.321	673.334
band243	605.792	579.66	563.662	657.605	731.764	668.363	679.544	770.166	756.182	714.157	709.722	813.538	642.008	865.746	587.164	630.763	754.952	616.044	702.557	726.242	618.092	713.106	707.515	632.623	754.39	679.128	792.851	719.221	692.591	672.69
band244	603.719	579.973	565.553	660.631	732.307	668.111	679.728	765.965	755.785	712.736	707.836	810.677	641.068	859.988	583.462	631.941	752.676	618.47	702.937	724.121	620.962	711.138	705.423	631.654	756.429	679.254	787.123	717.003	691.667	672.451
band245	599.986	577.147	560.006	661.107	729.338	667.001	678.447	764.629	753.32	710.412	704.489	809.591	638.961	860.771	580.897	630.357	746.834	616.102	702.435	723.169	618.623	711.316	703.861	629.093	744.636	675.887	789.835	714.584	689.387	670.139
band246	601.428	578.168	561.117	657.665	727.542	666.338	676.071	764.019	752.118	705.193	703.954	804.335	635.918	856.334	577.71	629.803	747.679	611.724	698.75	717.518	614.546	710.748	698.378	627.632	746.468	674.486	781.894	712.425	687.141	668.966
band247	595.476	574.826	559.026	657.696	721.215	658.902	673.248	760.618	747.376	706.476	698.991	799.923	632.086	851.913	580.872	626.606	743.431	610.476	695.168	715.519	613.782	705.442	700.288	626.898	738.578	668.149	778.182	708.344	683.911	665.486
band248	594.822	572.363	561.394	654.714	718.665	658.387	670.135	756.157	746.096	700.061	695.813	795.732	632.425	846.424	575.736	625.635	740.008	606.752	689.403	713.912	610.691	704.313	695.063	625.374	743.623	667.514	769.762	710.063	681.466	663.279
band249	595.823	568.733	553.851	652.154	714.239	655.367	665.244	756.5	743.326	697.75	693.795	792.302	630.548	844.607	571.608	621.178	736.227	606.777	686.846	711.464	610.175	699.048	692.162	619.259	733.968	666.444	770.488	703.892	678.349	660.299
band250	589.33	566.358	555.845	652.243	709.669	653.926	664.54	754.651	740.767	696.21	691.672	786.157	630.103	842.811	571.733	618.069	733.13	605.862	686.886	705.482	604.714	695.583	692.783	619.654	735.89	659.674	765.993	699.841	676.056	658.354
band251	588.44	564.559	554.306	650.733	709.275	653.322	664.222	751.03	736.976	691.481	689.838	782.468	628.984	834.195	571.885	624.734	729.77	606.071	682.583	706.358	607.789	693.112	689.513	615.19	732.143	661.297	761.514	700.287	674.36	656.435
band252	590.453	564.19	550.768	648.105	707.013	652.319	663.791	748.879	737.188	688.361	688.933	781.728	624.651	839.269	567.749	619.854	731.194	603.276	683.621	701.756	603.03	692.187	690.358	616.037	733.058	658.184	759.465	698.002	672.979	655.107
band253	586.802	564.556	549.983	647.366	705.819	649.854	658.896	749.925	736.08	688.046	685.563	778.557	621.671	833.341	569.987	621.292	731.079	603.876	679.142	701.712	606.367	693.109	685.816	613.89	728.578	657.759	760.691	696.805	671.663	653.733
band254	587.177	562.196	550.617	646.897	703.326	649.846	656.45	750.049	734.702	685.322	683.218	778.556	619.979	835.913	571.008	620.584	722.582	604.174	681.108	700.665	606.714	689.302	682.825	613.412	731.162	656.933	757.304	693.96	670.571	652.658
band255	584.174	561.86	550.857	644.816	701.263	645.072	656.607	745.904	733.138	683.346	683.191	775.418	622.47	828.539	568.972	618.335	725.827	602.527	675.153	699.613	603.783	688.152	682.602	611.126	723.669	655.313	753.943	691.957	668.487	650.704
band256	584.395	561.329	545.526	647.259	699.713	644.881	656.61	745.266	730.968	683.518	680.641	770.97	618.567	830.353	567.867	617.899	723.321	602.805	678.37	695.771	602.476	687.636	680.276	610.21	726.032	654.962	752.191	691.729	667.555	649.946
band257	581.501	559.653	551.102	642.746	696.125	644.678	654.031	743.227	729.045	682.027	678.916	770.621	621.766	827.118	567.287	617.576	720.163	600.48	676.689	694.262	600.595	685.395	678.923	611.075	720.156	648.489	749.191	687.556	665.728	648.414
band258	579.453	554.46	542.451	637.636	690.62	641.32	650.258	740.132	726.079	678.851	678.313	766.941	618.626	820.393	566.169	610.692	716.829	598.186	670.759	692.114	598.414	682.631	675.302	607.372	716.364	648.077	742.458	686.88	662.064	644.126
band259	575.512	552.426	539.923	636.456	690.029	638.001	645.463	737.067	721.2	672.312	671.124	761.276	613.218	824.121	556.364	607.278	709.189	593.503	663.64	685.782	595.348	676.411	672.899	603.013	714.149	644.565	740.158	682.052	657.946	640.839
band260	574.881	551.108	536.506	632.76	686.454	636.093	642.807	728.604	719.228	670.092	667.238	756.841	609.575	810.635	558.413	602.503	705.102	590.707	663.585	681.617	593.629	674.682	667.616	598.206	713.552	643.521	731.545	680.561	654.574	637.853
band261	567.564	546.748	535.96	627.342	679.847	630.522	636.835	725.981	712.685	664.107	664.402	750.213	607.799	805.059	557.633	603.254	701.773	586.555	657.93	677.432	591.015	671.266	659.76	596.447	701.753	637.035	729.356	674.978	650.045	632.759
band262	564.195	544.944	532.528	624.97	675.415	625.444	635.264	722.939	709.389	658.861	661.531	743.81	602.651	799.588	551.559	595.436	696.617	583.291	654.267	675.145	584.416	664.704	658.57	591.871	692.584	634.914	725.861	670.362	645.754	629.395
band263	562.94	545.586	528.962	624.276	671.005	623.122	632.261	717.205	705.175	656.76	657.771	742.276	600.392	796.183	548.046	595.13	696.378	582.42	650.395	672.236	585.073	663.922	657.76	588.578	694.357	631.649	720.208	666.978	643.466	626.729
band264	561.839	541.014	523.953	619.77	670.261	621.969	627.258	714.01	701.294	650.459	652.939	735.92	594.433	792.659	544.749	592.59	692.5	578.568	649.043	666.631	584.186	659.32	652.432	587.879	691.409	627.658	714.233	663.562	639.734	623.183
band265	556.375	537.151	524.706	615.932	662.767	614.791	624.689	712.053	698.169	649.716	650.256	731.93	588.255	791.793	544.033	591.41	686.89	574.449	645.537	661.417	576.343	653.512	649.493	585.019	688	620.401	710.632	655.685	635.764	619.635
band266	553.719	534.327	518.872	614.765	661.589	611.357	621.612	709.07	696.145	645.709	646.538	730.179	586.916	782.446	539.446	589.789	685.816	572.838	640.847	659.848	573.55	651.178	647.453	580.244	684.656	618.871	708.729	654.012	632.876	616.717
band267	552.442	535.414	521.194	612.166	658.096	611.847	617.812	706.635	693.365	641.751	645.205	723.113	585.797	779.505	535.459	586.325	683.071	568.727	639.497	654.94	570.738	648.387	644.783	581.317	681.545	619.995	705.724	654.14	630.678	615.072
band268	550.011	530.501	519.402	610.034	654.213	607.434	616.386	700.657	690.718	643	642.453	721.46	584.279	777.659	535.123	586.302	680.765	568.326	636.373	653.523	573.864	647.326	640.58	579.519	682.578	615.382	701.267	650.252	628.55	612.236
band269	549.722	527.384	512.932	607.861	652.94	608.288	614.414	702.713	688.62	636.405	639.594	715.742	579.316	777.715	536.333	578.698	675.589	569.029	629.51	652.592	565.831	643.254	641.662	573.69	678.545	614.569	700.021	649.502	625.803	610.128
band270	546.614	526.505	511.996	604.095	650.7	606.14	611.637	697.536	684.425	631.909	634.91	710.035	576.922	771.576	534.949	575.01	675.051	560.919	628.993	646.453	562.847	643.515	636.052	571.518	672.422	612.064	694.927	645.116	622.316	607.156
band271	542.023	522.418	512.8	601.521	645.87	599.88	607.187	692.694	678.827	632.048	633.581	709.794	576.333	763.913	530.741	574.738	667.551	560.696	626.68	644.624	563.844	637.866	631.626	568.458	671.058	607.492	689.547	643.377	619.185	603.527
band272	536.329	518.985	502.502	598.436	641.917	597.017	601.711	689.985	677.164	625.192	629.712	702.085	572.487	761.628	528.336	571.959	666.908	556.874	619.41	637.554	556.847	634.087	626.764	562.942	664.292	602.754	687.434	637.579	614.603	598.924
band273	532.642	515.249	500.196	591.01	634.876	591.486	597.874	684.405	671.231	620.692	623.973	699.933	569.48	756.068	523.149	564.602	658.911	554.194	619.182	634.557	554.853	627.321	623.107	561.821	659.006	598.974	679.465	631.115	609.978	593.966
band274	529.087	510.804	500.064	587.93	630.851	588.062	595.386	679.378	667.323	616.157	618.131	692.318	566.269	748.09	517.277	566.282	652.977	549.824	613.128	630.854	550.859	624.267	615.902	555.958	655.383	596.093	675.557	627.111	605.761	590.504
band275	524.558	506.934	492.364	580.798	624.62	583.661	590.077	671.732	659.13	610.869	610.131	684.028	555.384	740.864	515.095	559.037	649.064	542.412	607.19	621.098	542.546	619.136	610.724	551.471	645.909	588.637	669.868	619.402	599.169	584.474
band276	519.766	501.467	487.245	582.849	621.013	578.203	582.999	668.623	656.102	603.119	605.828	679.356	552.634	739.245	507.559	552.613	645.86	539.436	603.628	618.241	540.791	614.939	610.075	546.132	637.727	586.198	663.087	618.025	595.099	580.139
band277	515.49	498.199	488.681	574.146	614.975	572.702	579.551	664.19	650.404	601.361	603.597	675.164	549.749	729.861	507.736	551.024	640.217	538.327	597.911	611.322	537.987	608.63	603.574	541.953	642.903	580.073	657.686	610.622	591.001	575.97
band278	512.164	494.338	486.402	570.286	611.489	570.959	574.366	658.881	645.99	596.514	600.493	669.166	545.057	725.04	500.944	546.531	631.357	533.77	594.412	607.684	534.224	602.858	603.583	540.75	634.045	575.248	650.446	606.698	586.561	572.139
band279	507.228	487.522	479.319	565.326	607.264	566.367	572.765	656.572	641.781	591.471	594.506	665.951	544.37	715.898	500.551	541.44	629.082	530.823	589.727	601.885	529.412	600.547	596.168	534.957	634.286	571.744	652.017	603.907	582.603	567.562
band280	506.989	488.741	475.145	561.442	602.799	561.839	568.811	650.53	637.489	586.909	587.967	657.093	536.359	717.854	495.313	537.538	628.551	526.074	585.563	598.108	526.783	596.487	591.335	530.707	629.227	571.818	641.575	599.136	578.507	564.069
band281	502.309	484.986	473.345	559.512	598.316	558.588	568.061	646.577	632.897	583.929	589.292	658.803	533.351	712.808	494.405	533.493	622.298	522.491	581.883	596.403	523.614	593.11	590.639	527.514	621.558	567.942	641.014	595.609	575.527	560.852
band282	502.319	483.489	471.951	555.468	595.289	556.252	563.64	642.036	630.045	580.039	585.04	654.071	533.021	707.294	490.046	532.201	620.819	519.726	580.384	591.626	521.783	588.209	588.049	525.905	618.539	563.685	636.632	591.559	572.468	558.053
band283	499.271	479.174	468.838	552.704	590.976	553.256	561.211	640.132	627.428	576.939	578.484	647.841	528.016	702.523	489.21	528.992	615.648	519.01	574.721	587.675	519.121	586.087	584.933	522.409	612.656	558.733	634.953	590.347	568.975	554.993
band284	497.501	474.164	467.517	550.716	588.854	550.566	557.755	636.256	623.532	574.964	577.573	646.066	526.71	696.56	488.231	523.6	614.02	515.676	572.832	586.533	515.143	583.325	579.319	522.263	611.487	559.327	631.13	585.603	566.329	552.183
band285	495.271	475.033	463.519	544.143	582.446	543.177	553.06	631.831	617.642	570.058	572.859	638.095	520.556	694.443	482.656	517.355	612.954	510.963	566.561	580.794	510.002	578.382	579.384	517.94	605.786	549.569	624.797	579.689	561.392	547.618
band286	494.279	470.378	459.464	539.736	576.014	540.735	549.138	627.147	612.793	565.878	571.507	633.731	520.986	685.328	478.492	515.292	606.515	507.576	561.367	576.666	504.629	572.307	571.358	511.511	597.039	546.617	618.998	575.417	556.818	543.556
band287	490.378	468.011	455.636	535.966	572.346	532.695	542.545	620.559	606.18	560.775	563.769	628.637	510.78	680.353	471.7	513.053	597.329	500.897	553.812	567.909	500.339	565.839	567.173	507.882	597.032	540.088	610.472	568.95	551.111	538.509
band288	492.637	467.511	452.949	530.929	568.131	528.766	539.504	613.047	601.051	555.086	563.695	621.82	511.041	673.687	469.377	507.562	595.268	496.359	552.624	567.625	499.379	563.831	562.074	504.838	590.851	535.81	605.302	564.445	547.686	534.961
band289	492.412	472.916	452.619	525.421	560.765	525.718	532.928	606.346	593.885	551.348	560.417	617.264	504.556	667.334	467.072	502.85	584.745	494.223	545.721	558.144	492.633	557.292	555.075	503.583	584.344	530.262	601.542	558.747	542.863	531.436
band290	497.095	474.756	453.196	522.726	557.377	518.976	528.168	604.226	590.225	550.626	560.721	615.401	506.064	659.093	467.164	501.527	580.995	491.718	545.697	557.634	494.117	550.548	551.361	503.398	584.383	529.256	594.969	554.323	540.919	529.737
band291	501.495	473.538	454.602	517.482	553.304	516.69	523.217	596.914	584.703	550.471	560.574	616.842	505.579	653.043	468.092	500.235	575.676	493.866	543.677	557.57	494.149	549.109	544.792	504.577	588.864	523.649	592.347	551.487	539.162	527.242
band292	495.318	472.436	455.287	517.325	548.433	513.669	519.894	592.188	580.215	555.602	562.99	618.658	503.667	646.889	468.697	499.846	572.515	492.52	542.077	556.643	491.224	546.053	542.259	504.872	586.188	520.661	581.222	546.132	536.91	525.037
band293	499.767	476.563	455.081	518.107	549.274	510.536	514.858	587.011	579.167	553.341	563.511	618.575	506.616	642.96	466.408	501.661	573.546	496.795	544.389	559.805	495.437	542.619	540.012	505.156	586.597	520.845	575.465	546.701	536.814	524.37
band294	500.62	474.195	456.7	519.78	547.088	510.696	513.657	584.354	573.278	553.742	564.164	618.197	505.415	639.941	472.749	500.868	566.186	493.982	546.151	558.579	494.559	543.456	534.637	507.32	593.851	517.682	572.165	545.005	536.036	523.411
band295	499.482	476.786	460.66	516.802	545.714	511.062	508.988	584.06	574.57	556.465	565.33	621.283	511.593	636.762	476.882	501.704	568.143	495.63	546.28	560.372	496.578	540.676	530.94	511.261	594.857	519.407	574.679	545.356	536.869	523.459
band296	501.867	479.989	459.872	518.757	547.494	512.939	510.154	579.915	572.042	557.376	567.01	621.612	512.287	634.474	474.479	505.379	562.176	496.831	547.064	559.996	496.309	541.243	533.954	510.564	591.649	520.427	566.816	545.435	536.718	524.041
band297	507.74	484.593	461.647	520.665	550.363	513.646	508.198	580.182	573.933	559.729	567.842	623.712	512.943	632.238	472.938	508.69	562.684	498.618	548.961	563.777	499.331	541.822	529.182	510.444	590.812	520.847	571.986	546.368	537.996	526.07
band298	505.195	480.868	461.736	523.986	550.453	514.093	511.244	582.097	575.143	560.019	568.432	625.142	512.324	635.622	477.685	508.903	567.403	501.235	550.913	563.322	499.049	544.644	533.138	513	594.214	522.059	570.281	548.195	539.3	526.484
band299	508.27	480.911	465.374	523.756	553.348	517.153	512.443	584.735	578.396	559.246	570.107	625.939	515.257	639.576	472.218	510.905	561.791	501.964	551.481	565.333	504.085	547.459	532.248	514.909	597.513	525.374	571.665	552.141	540.843	528.363
band300	509.319	484.688	466.121	525.704	555.706	517.742	512.993	584.189	577.603	560.199	571.919	624.562	512.417	640.291	477.787	510.237	567.849	502.618	553.922	567.025	499.049	549.619	533.931	514.862	595.623	525.518	573.578	551.324	541.657	529.426
band301	508.831	482.204	465.245	527.786	555.456	519.499	515.519	585.915	579.483	560.68	572.195	627.115	515.733	640.601	474.387	511.264	571.64	503.834	551.644	569.277	503.493	549.943	538.289	512.481	595.799	528.307	575.835	551.896	542.655	530.062
band302	509.313	485.711	465.347	525.65	554.89	520.845	515.264	587.17	581.741	562.318	574.873	628.478	517.456	640.647	480.49	513.398	567.582	505.912	555.502	567.764	504.727	550.083	536.481	513.199	600.896	528.101	578.252	552.878	543.749	530.825
band303	512.13	488.979	465.702	532.832	554.543	518.151	516.759	589.077	582.005	564.897	577	631.206	517.747	640.331	483.238	513.554	570.077	508.656	556.134	571.111	505.921	547.771	539.084	515.714	602.318	528.262	578.429	553.158	545.171	532.507
band304	511.904	489.4	468	529.466	557.654	524.308	517.955	588.335	582.115	562.92	577.111	632.379	518.94	645.015	487.777	513.724	571.365	508.014	555.102	569.14	506.539	553.313	543.902	519.245	606.13	532.375	576.481	555.596	546.579	533.206
band305	514.521	485.94	469.404	529.704	558.877	523.497	519.926	589.718	584.354	564.982	574.692	633.251	517.088	645.037	482.364	511.294	575.814	509.591	556.342	571.795	506.467	554.11	540.865	520.78	601.487	533.094	581.627	555.043	546.845	534.092
band306	513.825	487.481	468.136	531.476	557.37	525.113	521.378	589.446	584.098	567.885	581.635	630.603	520.464	643.981	484.328	514.641	572.982	507.852	559.507	571.684	508.785	553.659	541.1	520.314	605.987	535.502	576.215	557.879	547.619	534.621
band307	513.809	488.201	473.494	531.822	557.7	522.718	520.398	592.642	584.639	570.892	580.144	634.818	523.963	649.65	486.29	518.142	575.018	509.709	559.206	572.618	511.439	554.595	544.355	524.219	608.753	531.578	583.083	557.069	549.32	535.631
band308	518.208	493.019	473.9	537.017	559.672	522.597	522.318	593.337	587.331	569.045	578.954	632.798	522.446	645.703	486.1	518.521	573.194	509.791	561.657	573.678	509.944	552.996	546.873	523.462	608.234	534.204	576.807	556.854	549.595	537.644
band309	517.704	494.525	471.506	537.156	557.85	526.209	524.829	593.907	587.236	570.696	583.222	635.373	521.961	648.297	484.085	523.174	580.436	513.785	562.99	577.059	509.883	552.85	545.162	524.323	604.636	533.196	579.851	559.544	550.766	538.162
band310	516.242	494.233	473.219	537.722	560.843	526.997	522.966	596.831	587.967	570.79	579.148	636.055	527.84	644.796	488.787	521.071	577.61	513.102	563.128	574.833	514.866	554.525	548.905	524.6	609.74	536.974	581.281	562.029	551.682	538.781
band311	520.819	495.33	472.583	539.851	562.241	529.361	523.988	596.782	590.149	569.749	580.513	635.761	524.542	652.17	491.162	519.116	583.423	514.003	559.906	573.99	510.672	557.961	546.547	525.921	608.942	538.077	584.267	561.04	552.459	540.085
band312	520.76	495.263	476.379	539.651	560.517	526.876	523.851	599.557	589.084	573.241	585.986	637.332	524.969	652.991	489.297	524.481	579.763	513.077	561.917	577.469	516.482	555.834	547.587	524.544	605.474	537.069	579.502	561.342	552.868	540.518
band313	519.105	499.637	476.047	538.898	560.82	528.088	526.649	601.405	590.777	569.585	583.561	633.666	520.175	649.464	486.344	521.698	578.76	513.597	565.583	576.246	515.412	556.502	550.619	524.698	606.006	536.503	583.936	561.066	552.673	541.101
band314	520.619	494.253	476.262	538.249	561.652	529.453	526.746	600.484	592.451	572.993	587.023	638.883	529.037	654.251	492.659	523.099	578.622	516.938	563.326	578.17	515.194	557.51	549.423	527.374	610.481	537.794	581.611	563.605	554.22	541.316
band315	527.02	497.689	474.713	542.265	562.562	533.072	527.408	604.04	592.461	572.8	581.212	637.482	526.138	651.851	490.5	526.416	585.143	515.505	563.592	577.389	518.968	560.214	551.286	528.072	605.727	539.232	584.34	565.509	555.093	543.403
band316	523.781	494.553	477.474	541.133	561.556	527.722	527.467	600.605	593.811	575.382	592.472	639.366	529.852	650.975	493.746	526.071	585.276	519.984	564.184	579.935	519.392	555.564	549.44	528.332	614.26	539.284	584.061	561.141	555.601	542.348
band317	523.606	498.429	483.779	544.142	563.311	531.965	526.909	600.73	594.601	577.395	592.158	641.453	530.345	652.839	496.31	526.949	587.546	518.789	566.465	583.551	520.339	564.253	550.119	531.713	613.513	541.377	582.979	568.232	557.636	544.487
band318	525.447	499.196	478.219	545.313	563.618	529.666	529.069	603.142	596.185	576.193	589.523	644.548	530.846	652.898	498.249	530.055	581.311	521.007	566.937	582.686	523.145	559.906	555.366	529.395	616.182	541.989	584.137	565.959	557.864	544.605
band319	527.113	499.866	484.811	545.724	564.475	533.645	530.577	605.754	597.471	575.831	591.405	642.25	532.29	656.762	496.795	529.073	590.742	522.027	564.814	582.775	520.482	560.601	557.596	531.08	624.76	544.474	587.068	565.336	559.486	546.527
band320	528.262	502.568	480.828	548.833	564.308	532.357	531.488	608.533	597.473	576.755	592.137	640.569	531.419	655.406	494.577	530.063	590.482	524.449	570.761	583.673	521.09	559.833	560.289	532.347	618.312	545.351	592.712	568.403	560.117	547.141
band321	528.259	505.122	479.989	545.113	564.554	534.68	530.252	607.978	597.825	579.832	596.386	642.901	530.688	657.031	496.641	532.27	588.847	523.108	569.421	584.071	524.974	557.527	554.049	531.955	620.74	538.719	586.811	565.533	559.831	547.36
band322	532.217	502.407	482.955	548.01	565.133	532.663	529.453	609.283	600.136	576.155	588.187	640.733	528.503	660.876	495.731	526.314	586.98	522.072	565.705	579.711	520.832	561.911	554.466	530.567	615.604	541.256	595.229	567.809	559.318	547.841
band323	528.798	505.995	485.015	549.402	566.039	536.612	532.574	609.247	600.124	579.743	593.33	645.233	539.273	655.969	505.928	531.428	588.138	524.971	569.184	586.072	526.97	561.873	555.153	539.635	627.429	542.85	588.215	568.158	562.263	549.355
band324	534.287	507.488	492.172	549.908	567.494	539.656	535.373	614.286	602.698	579.04	599.198	642.514	536.021	655.511	504.962	531.649	596.202	524.722	567.314	581.685	524.802	567.022	563.677	535.843	619.825	549.011	592.34	570.962	563.774	552.24
band325	536.726	505.762	489.97	550.842	568.584	539.354	536.644	610.187	603.715	581.454	599.017	647.187	540.624	668.774	505.392	536.414	592.536	524.963	571.01	588.421	529.42	565.473	560.942	537.073	627.922	543.65	588.965	569.745	565.027	552.324
band326	536.488	505.486	489.972	553.305	567.425	539.85	536.318	610.096	601.929	580.973	594.939	643.11	535.795	656.347	500.792	537.465	593.237	527.609	571.425	587.432	528.825	567.681	560.325	538.014	619.792	546.863	589.231	572.96	564.06	552.184
band327	533.955	508.964	485.034	552.229	567.4	540.088	538.316	614.911	604.026	582.576	596.591	646.781	541.402	666.031	505.051	539.383	597.301	528.659	574.039	587.352	532.222	564.791	558.884	541.642	631.753	551.251	589.719	572.841	566.185	552.75
band328	535.862	507.94	486.045	556.831	571.484	541.882	538.277	616.953	607.378	581.311	598.6	644.223	536.105	667.18	505.326	541.718	600.482	529.181	576.643	586.342	525.006	566.05	564.525	537.908	618.701	547.077	600.502	570.914	566.444	554.396
band329	538.791	505.099	489.362	558.767	567.944	542.475	537.021	614.099	607.267	583.865	603.613	644.01	543.425	670.579	506.859	545.915	600.347	530.799	572.95	591.479	529.482	569.088	565.346	540.65	631.818	552.249	591.759	576.394	568.266	554.469
band330	537.426	511.515	489.447	555.78	572.546	545.288	539.246	615.782	609.247	581.057	598.009	645.222	538.46	665.851	505.687	538.801	597.291	529.762	571.995	586.114	532.075	570.812	568.441	540.053	618.097	555.815	596.396	575.04	567.545	555.733
band331	533.884	511.444	494.757	557.418	572.462	546.005	540.436	614.67	608.127	587.05	601.698	651.888	544.193	666.941	509.497	546.961	596.069	534.095	578.42	591.498	538.893	569.189	564.26	544.391	636.045	553.909	592.111	579.705	570.215	556.625
band332	538.397	513.942	496.757	562.65	571.825	545.088	544.337	619.603	609.474	587.903	601.984	651.053	541.232	662.994	505.815	544.83	599.974	534.559	576.625	592.848	533.866	570.15	569.224	541.787	622.532	552.55	594.505	576.816	570.119	558.998
band333	537.457	518.218	494.347	558.146	569.833	543.827	542.825	621.08	610.36	585.705	606.386	649.567	542.873	668.09	505.4	548.438	600.038	535.351	578.793	594.671	533.282	571.566	566.914	547.514	623.578	550.794	597.722	575.763	570.662	558.18
band334	538.882	513.938	496.547	558.1	577.378	547.045	543.792	621.197	612.286	588.243	606.568	653.578	546.735	671.186	508.277	545.479	596.508	539.355	578.975	593.082	535.217	576.809	569.096	546.153	623.013	559.462	596.2	581.75	572.316	559.741
band335	544.141	520.626	494.596	562.679	576.655	548.142	544.293	624.464	615.849	591.406	606.684	654.484	546.99	676.17	506.492	550.101	593.809	539.711	582.432	597.023	538.326	570.924	567.833	546.849	627.532	556.112	605.42	580.358	573.932	562.285
band336	545.581	516.36	490.789	562.116	576.81	549.647	546.824	624.203	613.556	583.939	607.202	648.281	548.645	672.598	510.692	547.696	601.37	535.018	581.109	593.495	534.911	570.356	571.662	547.063	635.76	554.465	598.439	578.477	573.109	560.983
band337	541.764	521.288	498.732	567.582	581.935	555.778	543.354	627.185	619.8	587.916	611.383	652.53	546.686	678.461	514.287	550.213	603.52	541.181	581.948	596.212	539.002	581.021	571.608	549.625	632.695	562.383	607.875	587.102	576.895	564.533
band338	543.571	516.195	501.987	563.194	575.413	545.856	551.39	623.809	614.245	594.476	612.235	657.376	554.778	676.207	520.731	552.016	608.059	538.403	583.567	594.86	543.589	575.552	576.348	549.273	634.623	558.11	604.139	575.748	576.634	563.014
band339	544.273	520.088	501.857	564.665	576.484	551.142	550.943	630.407	619.268	594.932	611.503	659.016	553.121	676.926	520.221	552.822	610.365	543.763	585.552	598.448	544.842	575.912	578.303	555.278	642.513	562.679	607.243	584.571	579.183	565.406
band340	553.067	519.56	507.617	570.356	580.007	554.711	554.945	633.802	621.232	594.955	614.449	658.909	553.183	681.944	514.431	557.327	612.622	544.541	586.391	603.837	540.857	576.741	577.908	550.59	643.442	564.465	605.351	585.762	580.821	569.025
band341	548.764	521.796	501.926	568.355	584.62	554.131	549.551	630.588	619.571	594.155	616.722	665.495	554.813	683.703	522.469	554.738	608.467	548.206	587.805	604.898	549.275	584.626	576.636	558.446	641.688	564.286	603.785	589.738	581.759	567.346
band342	548.355	527.207	507.56	569.802	580.987	558.203	554.467	634.1	622.591	597.37	619.259	660.38	561.394	672.74	524.179	552.318	617.087	548.778	593.389	599.475	552.962	581.86	576.827	557.54	639.149	564.925	604.693	588.195	582.707	570.064
band343	553.349	525.112	510.372	571.748	583.708	561.349	552.287	636.868	626.312	598.96	618.516	667.5	556.571	685.678	520.513	562.793	617.27	552.509	592.301	604.49	547.348	584.521	581.234	555.41	638.208	565.759	604.722	590.253	584.488	572.007
band344	551.296	521.071	504.119	569.869	583.895	558.905	556.442	635.247	627.055	597.344	620.298	660.226	553.924	682.7	519.903	556.329	616.824	548.618	588.211	604.93	546.294	583.179	585.646	556.161	640.357	565.655	609.111	587.919	583.269	570.524
band345	547.673	528.323	512.117	569.735	587.686	563.631	559.18	636.828	627.331	599.003	622.654	666.075	565.415	680.935	526.736	562.785	610.589	549.825	591.431	601.065	547.597	591.4	584.078	562.657	648.006	570.955	610.37	595.125	586.4	573.151
band346	554.722	529.177	514.247	577.605	588.189	564.102	558.253	637.329	626.038	601.786	628.745	670.796	565.908	688.263	533.441	564.698	620.281	554.754	595.962	612.35	554.902	588.311	584.658	564.47	653.623	568.845	606.38	597.165	589.464	575.145
band347	551.986	524.138	506.887	578.355	587.882	561.916	558.558	636.126	630.47	598.437	618.652	665.249	560.216	685.994	526.005	563.564	615.069	555.105	596.341	611.077	555.755	592.397	584.136	557.22	641.091	574.372	608.899	596.47	587.227	573.475
band348	557.972	527.451	513.743	574.831	585.512	560.852	559.795	638.258	629.753	604.269	621.142	665.511	556.526	680.799	528.923	559.897	616.523	554.305	595.059	607.591	557.9	589.355	592.21	560.762	629.078	570.896	612.83	596.276	587.429	575.243
band349	552.571	529.475	509.391	579.72	584.797	560.624	558.733	641.119	630.109	601.456	625.667	669.772	558.789	682.427	526.126	565.556	626.105	558.86	594.148	616.448	554.791	589.369	590.691	565.006	637.448	573.65	605.861	596.767	588.767	574.8
band350	559.129	530.996	513.755	578.503	588.285	561.698	562.484	643.99	631.087	603.248	624.631	670.494	565.035	679.632	528.703	564.604	621.536	555.293	597.996	611.106	554.023	588.29	588.963	565.273	640.169	572.848	614.861	597.662	589.796	577.318
band351	554.456	532.855	510.955	576.416	586.865	565.465	563.371	643.845	633.902	600.031	629.014	674.435	569.269	690.879	531.864	567.462	622.923	559.197	597.176	611.401	557.409	588.323	594.648	564.031	660.026	580.992	615.057	595.642	592.068	576.816
band352	552.878	531.222	508.915	586.007	592.863	567.838	557.958	644.03	634.059	606.805	627.256	663.581	566.77	686.619	527.354	572.205	618.015	559.161	600.259	615.094	563.463	597.474	585.802	562.199	653.383	582.014	612.623	605.085	592.176	578.258
band353	556.698	531.705	512.128	581.583	588.302	564.292	569.673	647.103	632.595	602.392	626.912	670.221	566.895	688.195	533.059	576.988	632.651	560.647	598.139	612.061	561.348	590.299	596.776	566.163	642.974	576.661	618.292	603.026	593.135	578.647
band354	555.566	535.949	521.596	580.633	592.876	570.581	560.936	644.801	635.93	606.416	634.288	670.455	571.053	689.805	525.444	567.872	630.786	558.169	601.424	616.631	564.712	598.708	595.691	570.228	651.955	579.912	612.58	601.235	594.508	580.528
band355	559.857	539.6	519.647	585.061	587.077	567.445	564.104	649.217	634.825	606.229	633.996	676.521	570.715	685.898	546.374	573.458	623.918	565.945	602.007	621.804	559.718	597.227	596.496	570.97	655.578	583.002	618.889	599.193	596.242	581.306
band356	552.817	531.253	509.811	586.879	588.648	565.814	567.369	651.839	640.325	609.027	627.481	674.9	569.667	696.402	533.928	578.4	625.477	564.961	602.164	620.771	571.073	594.924	596.069	569.602	661.831	577.97	626.288	598.128	596.208	580.378
band357	563.039	539.247	516.587	585.58	593.507	568.047	565.745	649.392	639.139	605.456	624.222	667.313	567.437	688.285	526.856	573.627	624.865	564.176	605.941	620.833	563.416	601.203	599.649	566.571	665.987	583.858	616.693	606.149	596.172	582.574
band358	559.274	533.259	516.813	585.134	590.053	562.938	568.109	643.86	633.297	608.634	627.113	675.465	570.889	695.071	530.459	569.574	631.11	562.575	600.915	614.939	568.192	597.268	598.695	566.305	658.325	576.791	617.976	603.155	595.221	580.137
band359	573.963	540.47	522.226	588.189	590.623	567.55	562.526	649.423	636.251	604.945	637.819	671.948	570.117	693.724	536.179	567.266	629.38	563.368	604.993	615.615	564.209	593.277	600.103	572.385	664.578	578.334	616.618	601.447	597.055	583.617
band360	562.933	545.701	522.868	584.356	590.752	570.198	572.268	649.728	639.91	606.942	636.513	673.033	572.657	687.467	536.99	573.479	627.492	561.963	601.37	618.657	561.164	595.025	605.043	576.355	657.338	582.422	619.54	610.398	597.949	584.566
band361	570.236	533.171	517.63	591.456	591.143	567.504	568.428	655.188	638.039	612.357	635.97	675.553	568.659	698.641	539.295	570.748	627.334	564.26	608.845	623.485	568.143	597.872	605.332	572.433	666.565	582.462	617.255	604.967	599.035	584.515
band362	564.957	544.823	536.302	584.776	596.103	577.458	567.086	646.003	638.557	613.378	641.412	681.224	573.244	693.433	554.115	577.809	636.12	570.101	611.121	629.021	568.795	596.772	598.571	572.633	669.331	585.888	614.092	611.252	601.942	586.944
band363	568.82	541.399	527.181	592.087	596.369	567.829	568.622	653.13	643.25	612.723	637.033	673.964	576.47	699.294	541.423	579.513	644.668	570.808	603.331	617.962	573.049	594.145	607.199	577.667	664.558	582.366	624.771	604.504	601.576	587.141
band364	571.391	540.915	520.843	591.832	595.958	578.138	577.359	661.588	644.238	611.727	645.709	686.125	580.715	712.328	549.936	579.826	646.273	573.12	604.697	625.867	567.652	606.604	601.15	577.121	665.714	589.198	631.717	612.857	605.378	589.399
band365	582.012	552.384	529.564	597.025	597.532	577.381	569.59	654.128	649.949	612.644	632.544	670.425	567.924	694.985	541.679	577.797	633.212	570.653	608.065	622.457	567.339	602.835	602.908	574.557	676.617	590.42	627.769	608.311	603.311	592.221
band366	571.143	556.662	530.351	596.257	597.382	577.492	571.83	659.09	643.786	615.131	639.407	686.647	590.347	709.028	544.233	586.817	642.179	573.357	617.01	630.821	582.053	600.087	604.259	584.161	671.201	585.935	618.691	613.252	607.093	591.912
band367	570.972	548.014	531.413	585.994	591.847	571.163	570.396	656.342	642.47	611.541	642.838	684.721	573.774	695.573	553.626	581.809	633.538	570.271	604.769	624.753	573.829	597.662	607.279	579.332	673.513	588.11	629.019	609.732	603.725	588.015
band368	566.239	550.123	524.523	596.904	599.021	578.425	580.141	662.209	644.784	607.788	635.819	681.321	575.86	692.697	540.615	580.03	645.214	570.045	617.448	626.972	570.571	599.387	611.002	581.967	658.325	590.185	628.448	607.983	604.43	591.016
band369	569.964	544.915	526.391	600.049	604.077	576.582	571.103	654.219	642.418	608.241	634.892	679.299	578.678	697.923	537.023	590.941	635.367	577.538	616.809	628.654	581.68	607.409	604.427	574.866	662.63	586.882	621.967	605.678	604.308	589.796
band370	572.13	550.375	532.57	604.38	593.105	575.805	572.51	666.489	647.274	615.06	631.868	684.815	573.257	695.173	540.597	588.148	634.982	571.486	611.353	627.659	570.544	599.533	604.231	575.967	662.838	595.112	633.087	604.47	604.815	592.97
band371	587.93	550.201	545.719	596.286	599.47	582.751	574.091	670.038	652.073	623.073	651.608	683.531	582.17	707.817	550.808	585.471	642.574	576.73	610.49	631.234	577.646	606.127	610.055	581.248	682.422	591.756	634.443	609.323	610.61	598.163
band372	575.403	543.203	545.438	603.349	600.633	585.525	575.528	663.067	649.945	622.312	636.611	682.603	581.175	702.539	555.397	581.661	642.329	579.666	618.455	638.025	583.179	606.765	614.26	579.362	675.11	591.647	635.335	613.249	610.063	596.44
band373	576.49	553.542	542.404	607.535	600.942	576.942	574.551	667.186	650.094	619.292	652.531	694.827	587.78	721.393	559.741	590.974	642.194	584.869	620.716	639.07	590.669	605.545	619.714	590.194	666.656	590.383	642.382	609.128	613.491	596.898
band374	574.808	547.462	534.649	604.28	601.851	590.979	580.952	667.636	653.854	618.286	648.477	682.259	569.747	698.254	553.656	582.43	650.885	576.206	614.604	630.075	577.915	604.161	612.418	587.272	666	603.165	630.981	616.001	609.974	597.476
band375	567.653	558.616	549.26	602.344	601.911	582.872	579.696	667.978	655.862	621.553	650.239	685.529	587.248	694.195	556.787	585.556	645.934	580.392	615.768	632.848	588.169	605.314	614.021	590.49	678.721	593.497	631.91	617.154	612.197	598.774
band376	579.316	558.129	546.777	599.428	598.545	582.238	576.294	672.52	656.54	612.128	652.879	678.46	585.967	704.483	555.01	586.56	652.533	576.162	615.509	631.569	580.309	607.672	612.121	582.284	675.396	594.941	634.153	619.961	611.71	598.191
band377	582.53	552	537.894	606.457	600.426	580.674	583.929	664.774	653.473	614.202	651.101	677.764	578.064	699.285	554.436	595.708	646.719	582.014	611.318	633.887	580.623	606.546	614.677	581.873	657.078	588.776	622.682	614.946	609.781	597.636
band378	582.512	556.195	538.317	603.895	597.875	592.858	576.026	671.475	654.909	609.61	646.098	677.482	577.396	693.006	554.4	589.874	637.957	580.154	606.695	624.923	581.994	609.812	614.539	582.078	681.844	592.644	632.974	619.482	610.251	598.367
band379	573.757	552.811	538.487	601.492	593.187	581.995	580.705	667.319	655.872	616.974	648.274	682.139	578.049	698.167	553.156	578.872	637.98	579.973	601.792	630.193	585.49	601.304	609.433	575.249	673.318	599.875	632.028	610.559	608.516	596.26
band380	582.361	565.404	539.291	610.139	597.704	588.137	582.254	658.091	650.34	617.385	648.077	677.327	590.222	704.923	551.69	597.339	643.554	581.615	610.63	639.196	589.222	609.086	608.956	586.404	667.597	591.679	618.696	617.32	611.594	599.111
band381	568.405	559.703	546.887	600.712	598.01	587.548	578.025	668.024	655.099	614.251	638.528	679.02	576.292	699.576	548.595	591.31	634.418	580.608	608.624	623.652	580.648	603.361	610.008	577.934	672.552	591.567	614.238	607.09	607.667	597.666
band382	574.468	551.168	535.474	606.252	593.696	580.623	582.709	665.516	651.21	611.62	649.426	670.012	587.864	694.443	550.7	598.262	640.857	585.142	605.641	627.171	580.546	600.593	617.677	582.955	647.584	592.602	623.932	610.676	607.815	595.274
band383	581.343	551.048	529.121	612.974	587.496	583.977	575.97	668.252	651.136	610.665	650.415	680.833	589	698.563	551.672	599.316	644.273	585.559	617.471	627.536	593.407	592.149	619.538	585.972	654.513	588.583	623.724	609.235	609.419	595.198
band384	575.654	556.99	531.785	606.044	586.207	577.502	582.408	660.241	646.703	611.879	642.531	673.283	587.045	691.57	555.697	594.791	640.393	579.83	597.035	619.358	589.62	596.786	611.305	579.027	674.825	590.39	623.382	612.129	606.943	593.541
band385	574.257	549.545	525.972	600.907	581.163	583.957	575.456	667.553	649.639	606.685	642.452	675.158	577.739	694.04	554.005	590.734	639.528	574.122	601.445	619.213	577.906	593.057	608.265	581.287	667.786	580.97	626.797	606.497	604.505	591.514
band386	574.416	562.016	524.902	598.385	582.721	578.278	578.555	667.798	650.387	607.523	639.917	669.068	581.146	695.591	552.869	599.694	641.992	582.753	602.227	623.633	580.702	588.001	607.478	578.847	672.312	588.954	621.231	602.869	605.51	592.498
band387	570.278	558.042	534.36	605.729	581.095	574.052	569.401	667.517	646.996	612.757	643.651	673.014	589.858	698.288	571.851	602.034	636.37	587.675	600.814	631.442	583.691	583.351	613.694	578.368	672.662	587.906	610.366	602.918	606.721	592.023
band388	574.05	552.962	548.668	608.472	573.34	577.48	568.207	662.012	644.858	616.151	652.897	677.894	586.474	686.789	565.056	593.59	626.39	581.625	601.616	625.349	582.42	590.453	606.234	585.183	664.532	574.634	619.304	601.963	605.307	592.62
band389	573.789	559.104	543.849	612.974	576.62	577.884	576.252	664.357	648.396	601.893	647.704	663.972	587.947	672.833	551.474	596.548	646.122	580.933	599.987	623.905	584.019	582.288	612.461	589.357	657.662	585.805	615.854	604.809	604.957	593.512
band390	572.012	555.547	529.323	601.205	568.925	580.289	571.697	667.176	644.603	599.292	632.083	663.747	573.869	696.514	545.874	581.907	630.628	574.266	594.987	611.892	580.584	580.625	605.461	569.682	652.61	579.85	601.243	601.446	598.833	589.007
band391	558.51	542.941	533.706	604.264	568.823	576.092	568.15	661.537	649.669	593.474	631.393	657.147	592.752	685.341	555.831	592.166	616.959	579.707	591.145	613.574	588.473	580.944	609.245	574.779	667.448	588.275	607.816	603.963	599.79	585.717
band392	552.287	542.051	514.67	604.669	561.103	572.557	572.182	662.022	638.053	596.016	636.051	662.579	582.405	677.873	554.962	598.469	646.668	579.554	588.709	627.341	592.341	573.245	615.539	572.549	655.318	581.588	593.752	593.952	598.161	581.561
band393	555.043	561.459	534.219	610.279	557.268	568.446	572.841	663.639	642.312	596.964	629.45	646.312	567.242	686.149	543.841	590.28	637.959	569.903	580.186	602.575	583.147	572.997	603.377	565.836	651.442	566.585	603.559	590.544	594.78	586.247
band394	548.439	547.151	532.426	603.385	554.669	565.509	568.639	670.103	641.335	581.707	627.746	644.447	568.421	670.446	548.813	589.856	632.329	574.348	586.152	607.577	586.401	563.55	598.505	571.046	650.143	568.238	610.203	585.369	592.748	581.336
band395	543.84	533.056	532.362	603.38	538.345	551.755	557.101	655.039	628.118	590.841	631.916	647.5	561.626	657.554	547.136	580.085	625.949	572.862	573.769	612.952	581.883	542.295	597.744	564.291	661.195	548.238	593.337	568.33	585.804	573.384
band396	564.611	538.727	507.028	596.02	537.88	559.018	557.506	663.769	641.846	581.237	634.52	633.9	573.819	685.328	534.513	574.471	620.862	564.444	566.296	605.72	571.725	567.389	592.804	558.169	657.74	556.355	596.929	580.577	586.543	574.764
band397	540.167	537.212	520.657	586.071	525.024	545.736	553.043	654.165	632.118	573.356	621.013	631.957	558.094	640.124	523.528	561.3	614.651	557.501	559.592	601.463	580.305	549.37	592.671	556.189	627.753	547.415	595.462	562.822	576.741	566.755
band398	530.341	514.87	547.347	584.526	522.59	546.025	548.674	648.751	624.792	569.598	615.674	617.749	556.698	639.396	537.095	566.598	610.541	562.38	557.683	590.815	568.689	547.755	590.138	549.748	632.162	562.449	585.757	573.249	575.075	563.751
band399	531.38	518.118	524.853	595.846	515.497	548.195	549.959	656.122	620.577	571.647	617.823	629.426	559.476	633.279	537.49	588.759	600.092	562.259	560.233	607.385	580	534.196	586.124	552.08	646.299	537.931	572.163	561.625	574.958	563.219
band400	530.288	524.221	508.27	578.743	507.363	540.554	539.366	635.656	614.568	555.288	610.702	610.265	546.444	621.83	520.159	568.29	606.388	555.304	543.497	580.134	560.84	535.874	590.479	534.773	630.065	544.911	580.189	557.606	565.431	553.432
band401	524.18	532.399	524.37	581.955	503.554	535.458	541.627	642.081	618.088	553.354	617.425	607.956	542.92	601.316	503.244	560.207	598.385	552.262	546.17	580.964	556.697	523.288	569.504	530.722	616.117	544.915	582.285	549.771	562.186	555.707
band402	516.709	533.782	509.415	597.431	503.856	546.178	539.591	636.69	611.07	550.376	593	614.798	539.409	614.845	504.164	582.659	609.204	564.21	550.137	591.454	571.723	517.778	580.069	531.147	621.617	536.957	573.538	556.606	564.229	554.51
band403	527.487	512.311	516.506	581.289	499.792	541.6	539.413	640.522	610.256	543.996	598.103	591.869	550.294	635.731	536.641	567.854	595.066	544.556	536.603	584.7	550.891	517.252	588.1	526.54	618.468	541.866	585.34	553.597	562.023	551.317
band404	518.809	505.529	491.168	580.004	489.848	543.648	539.994	641.372	610.957	539.807	596.48	599.285	550.008	616.749	496.726	578.404	589.171	560.962	540.098	588.002	577.663	523.016	590.758	529.145	627.74	524.537	585.165	545.872	560.033	546.114
band405	501.89	515.608	516.947	578.988	495.827	532.907	530.632	641.731	610.187	542.332	612.403	608.566	547.353	618.037	515.731	568.649	579.214	552.331	530.663	590.483	585.266	513.274	569.495	538.933	641.935	530.585	578.047	559.012	560.965	546.705
band406	504.002	502.849	502.334	569.842	492.997	537.565	537.964	643.871	609.185	543.113	616.239	598.473	543.663	613.084	528.159	535.957	606.398	539.673	527.416	561.856	557.951	521.523	590.263	536.174	586.519	532.241	565.554	549.922	555.528	544.372
band407	514.907	508.737	503.585	591.609	489.528	527.466	538.516	634.086	604.867	542	595.976	604.485	535.097	625.916	505.346	596.844	589.559	558.042	545.45	572.181	575.733	504.124	578.926	526.268	644.364	530.796	564.816	547.795	559.179	545.53
band408	518.984	522.707	514.721	591.36	494.801	535.199	527.337	649.14	609.651	531.24	601.726	585.506	538	610.189	495.69	561.564	573.199	533.649	528.335	569.233	555.819	522.046	567.421	519.824	605.182	527.955	548.274	540.966	552.847	549.514
band409	515.374	508.579	494.406	583.356	485.141	521.355	529.555	646.36	608.597	535.478	601.762	595.247	534.439	605.3	473.051	566.511	595.138	553.102	517.959	566.485	560.439	511.232	574.538	519.191	597.766	516.39	576.165	540.462	551.192	542.82
band410	501.507	505.1	523.062	560.813	483.216	530.383	532.774	643.967	608.883	538.093	598.936	591.769	549.197	603.693	526.572	563.56	596.89	549.196	527.635	576.037	549.117	492.198	577.061	527.936	636.76	521.767	556.96	547.253	554.298	542.78
band411	501.895	522.297	510.085	571.854	476.946	523.764	523.04	642.522	607.626	546.938	595.746	594.461	543.191	595.864	496.995	578.053	579.401	557.06	524.508	569.086	544.313	496.411	577.384	523.525	602.63	510.553	578.946	524.129	550.686	542.697
band412	498.767	514.547	517.93	591.583	479.107	542.527	541.963	634.407	601.745	544.565	622.312	601.667	548.316	624.443	501.708	570.252	619.931	561.793	527.5	588.864	564.441	500.801	580.623	522.107	602.084	519.626	558.792	553.76	558.434	546.714
band413	526.879	519.085	494.053	582.594	493.243	529.886	518.124	626.146	615.293	535.587	608.835	593.865	539.031	607.074	506.869	563.053	571.564	537.05	520.299	585.212	567.313	514.69	563.596	526.802	623.968	531.997	560.616	550.55	554.046	544.089
band414	530.316	530.504	530.691	566.491	482.09	524.954	545.501	640.902	610.193	522.94	588.792	573.949	516.025	605.632	471.744	558.462	603.656	541.652	512.827	550.747	536.056	504.39	580.963	524.273	590.052	514.23	541.55	536.076	547.702	548.458
band415	507.84	530.908	511.379	586.848	505.124	537.048	539.236	644.682	612.385	527.805	595.487	586.036	520.402	623.365	529.541	566.073	608.554	541.974	534.023	566.69	547.461	509.436	569.743	524.345	588.117	521.732	570.936	557.966	555.898	550.325
band416	470.952	492.652	514.745	576	483.158	533.21	528.738	639.62	617.733	546.002	594.853	610.743	547.842	616.384	515.821	563.913	581.401	555.828	536.563	572.445	557.927	516.242	558.3	515.667	628.786	527.393	548.866	539.812	553.271	540.281
band417	524.505	531.255	514.013	582.029	490.45	522.239	528.834	640.667	616.804	515.446	588.776	590.549	533.14	621.728	526.826	548.091	563.431	544.985	532.192	580.766	552.249	506.703	561.538	516.545	626.688	520.931	559.137	541.59	552.932	546.624
band418	502.158	505.552	503.238	573.55	477.514	517.272	540.659	649.034	603.947	515.129	596.738	588.931	526.569	608.124	476.205	543.077	619.36	531.465	516.549	559.379	539.606	498.163	583.375	522.699	594.331	511.765	559.571	522.384	545.941	538.805
band419	513.371	521.978	532.917	589.093	501.915	545.049	542.884	648.426	614.699	547.328	611.523	596.551	533.48	612.356	509.946	570.692	606.911	531.304	510.599	563.07	555.911	516.715	577.257	528.565	605.864	542.42	564.182	554.08	558.896	555.766
band420	486.442	535.386	504.396	577.595	496.359	536.142	544.101	653.782	610.285	550.193	603.916	598.725	552.376	620.347	499.459	586.13	606.477	562.429	545.741	589.132	563.691	514.442	602.982	544.243	649.688	512.155	573.58	536.811	562.75	549.468
band421	527.093	514.752	514.006	575.467	499.778	535.107	531.095	640.732	618.362	558.689	595.301	604.146	554.195	632.551	514.982	572.604	576.52	531.289	524.433	581.593	552.876	525.24	580.32	535.859	606.857	543.067	557.08	553.016	559.179	551.508
band422	525.105	507.995	518.128	609.883	507.876	547.477	541.158	653.772	607.5	544.667	608.771	595.654	547.69	619.873	505.818	565.353	629.73	558.379	529.406	563.701	541.588	531.937	583.844	522.911	574.675	540.486	573.665	561.243	561.367	556.356
band423	532.184	528.64	518.053	590.372	505.285	550.49	551.961	658.561	628.733	556.228	610.37	608.889	544.918	649.486	525.074	564.499	613.13	552.41	536.258	593.382	580.512	541.365	590.145	541.052	620.299	540.518	592.7	563.857	571.049	562.051
band424	539.988	549.929	526.636	593.547	533.497	556.916	526.512	645.091	627.533	572.254	616.254	601.764	555.411	626.043	523.779	570.552	589.061	563.866	531.169	601.734	568.313	526.479	604.357	542.236	621.221	561.166	571.507	557.258	571.574	567.19
band425	519.967	534.022	556.366	607.328	521.331	539.623	563.061	651.634	630.657	562.056	619.009	601.099	554.39	652.916	482.926	555.548	622.505	538.241	530.051	589.283	559.597	532.861	609.19	529.963	564.851	529.181	591.356	543.595	567.593	568.604
band426	540.247	551.315	534.23	579.24	503.429	522.373	558.514	678.38	629.217	568.227	640.231	630.368	586.099	660.529	542.041	564.793	617.393	579.025	537.623	572.835	575.806	523.466	584.466	558.163	643.552	523.043	613.998	550.538	577.469	566.517
band427	517.606	542.627	567.934	597.149	534.732	574.616	582.312	671.213	631.74	579.037	620.338	599.677	563.136	670.399	518.887	585.874	612.362	557.411	547.64	612.357	582.992	524.695	610.285	552.279	591.604	536.987	589.031	566.089	580.036	579.897
band428	515.752	545.481	544.04	598.552	513.77	542.251	550.98	664.299	618.427	575.38	610.62	602.501	566.203	669.198	505.482	564.158	586.903	568.406	536.466	581.944	572.744	550.975	591.91	546.883	638.084	544.949	585.314	573.04	573.74	566.893
band429	519.719	532.315	552.085	587.41	516.444	549.947	562.51	650.032	624.532	578.581	618.463	596.534	565.384	652.269	555.379	578.783	607.964	546.985	539.616	588.77	565.411	516.76	597.689	535.784	627.214	562.748	572.439	566.002	573.849	567.357
band430	528.273	556.314	538.943	596.644	539.9	570.928	570.927	648.361	631.311	559.535	618.09	618.91	563.637	617.737	541.421	572.325	602.051	549.344	565.956	595.28	565.605	536.348	583.254	558.84	618.903	587.917	546.182	589.022	577.57	574.114
band431	539.029	552.188	558.589	577.11	536.253	527.933	572.745	668.407	632.612	585.686	656.679	638.935	563.499	669.3	545.359	586.976	622.704	576.341	566.437	612.731	573.48	522.444	619.49	564.463	620.87	545.578	628.517	553.982	586.369	575.055
band432	550.448	536.323	550.857	598.225	539.899	555.173	570.235	695.335	654.183	545.546	629.828	620.862	578.281	714.223	530.185	585.369	587.367	555.021	550.598	596.69	579.333	553.722	617.734	542.195	639.721	551.28	629.384	579.152	587.042	579.622
band433	532.922	550.37	568.987	594.43	547.964	540.57	552.491	654.715	638.931	573.204	638.832	637.144	568.029	655.588	552.972	579.566	603.694	562.308	545.879	593.582	580.149	560.203	608.576	565.659	619.734	561.157	602.533	559.256	583.909	575.458
band434	543.291	546.103	585.164	582.417	561.276	553.751	574.478	663.455	633.383	578.797	616.588	620.139	533.813	629.659	510.892	583.503	607.421	567.361	577.205	596.908	599.463	539.47	608.806	565.58	599.526	573.677	611.078	569.717	583.319	582.212
band435	536.299	534.358	550.991	611.819	574.821	579.97	580.407	665.379	642.493	587.265	638.873	640.764	581.092	694.08	563.997	565.606	608.459	570.105	588.656	616.899	556.205	565.864	583.349	568.119	637.857	582.911	590.243	603.003	593.567	586.38
band436	554.459	520.777	548.645	609.29	561.863	589.536	603.953	682.559	656.035	592.809	621.272	633.393	551.891	706.966	541.269	582.197	664.844	557.52	556.251	588.46	552.868	581.602	654.6	575.473	610.214	583.323	579.969	610.838	595.46	591.992
band437	540.02	545.975	542.74	623.697	563.296	564.769	571.618	652.695	637.314	571.683	633.083	637.957	594.246	640.579	576.349	610.97	592.518	597.177	593.838	598.887	622.245	555.582	609.56	564.656	669.89	567.962	636.172	585.361	596.459	581.381
band438	529.535	567.282	575.883	631.381	555.858	577.728	563.189	655.682	653.322	602.698	646.634	653.804	563.823	715.882	582.782	597.304	635.691	577.866	592.015	632.11	605.787	543.652	579.974	588.096	640.013	590.799	584.116	590.621	601.197	591.256
band439	539.71	554.984	570.136	580.176	553.468	584.072	579.577	669.11	636.863	605.94	654.862	621.504	573.431	710.399	536.026	570.231	657.691	565.311	558.817	590.393	555.695	555.421	622.216	563.998	646.045	538.76	627.509	584.95	593.118	587.404
band440	605.395	576.908	566.653	642.847	590.397	587.597	615.104	660.693	648.125	595.321	635.313	650.722	543.721	690.319	563.715	631.491	632.673	597.303	595.412	632.698	599.64	591.112	633.484	583.701	560.234	560.647	614.377	582.568	606.72	608.904
	436.488	413.373	411.56	450.769	517.946	458.701	470.155	518.376	512.288	508.475	510.234	593.157	458.75	583.833	414.416	438.072	511.356	433.431	497.044	515.473	430.526	496.018	480.509	446.562	535.154	477.501	539.457	500.18	484.279	469.813
	606.056	580.478	563.4	659.46	734.014	666.003	678.126	766.863	754.353	713.472	703.776	815.871	641.06	866.557	581.931	630.884	748.679	615.462	704.178	726.723	616.661	713.261	702.21	631.55	753.351	675.802	789.868	716.484	691.305	672.222

## Sheet: 24h
band	1	2	3	4	5	6	7	8	9	10	11	12	13	14	15	16	17	18	19	20	30	29	28	27	26	25	24	23	22	21
band1	475.543	579.748	557.538	520.667	536.376	509.542	526.943	547.478	534.87	574.658	558.768	596.13	571.948	554.511	559.593	520.279	529.149	522.056	565.226	602.953	539.84	525.614	541.332	596.862	579.691	550.708	579.92	566.439	567.263	546.911
band2	594.197	493.639	540.838	497.352	505.631	553.967	538.58	523.25	517.31	540.822	536.075	529.884	535.621	609.427	542.653	540.695	503.316	584.458	587.929	576.562	582.71	530.041	603.787	585.106	532.504	565.139	574.331	550.516	565.442	539.767
band3	586.017	497.485	580.843	478.772	544.835	546.917	569.124	506.623	482.768	542.388	520.517	531.9	545.701	502.653	569.112	554.659	506	534.246	563.631	579.565	505.501	529.424	523.262	570.606	555.483	559.482	589.249	550.429	524.925	558.564
band4	524.457	489.227	614.211	508.407	549.685	519.099	529.474	513.19	538.326	525.019	581.319	530.001	501.016	537.893	537.496	507.667	449.727	522.034	466.825	552.252	530.994	536.566	550.223	608.748	488.631	539.726	525.806	549.646	529.954	538.129
band5	527.553	463.77	510.23	489.296	501.816	512.936	508.213	483.574	478.102	516.662	512.062	500.596	507.67	527.349	520.397	479.996	481.458	523.521	491.131	523.683	543.948	514.663	541.459	544.333	491.009	508.505	558.81	515.388	518.07	483.084
band6	532.03	530.567	603.375	457.515	522.395	480.702	537.182	482.678	475.206	507.014	513.891	508.874	513.159	465.979	493.966	512.234	508.429	457.59	498.155	575.434	499.79	558.366	532.849	560.328	568.064	558.482	545.239	552.369	523.655	493.178
band7	570.14	490.385	524.923	450.41	504.466	460.487	495.134	502.059	470.209	476.548	454.866	504.248	475.371	435.15	528.702	504.345	492.273	553.767	519.738	559.006	470.945	514.247	497.626	539.495	490.677	528.956	542.089	508.717	507.793	467.739
band8	473.733	492.452	520.748	435.099	482.499	485.265	493.909	472.155	488.611	481.928	454.305	461.556	455.819	464.018	480.977	491.487	461.025	500.64	432.841	539.467	493.315	490.794	464.824	514.491	499.524	496.483	529.349	517.503	481.651	481.763
band9	453.333	455.027	487.801	421.13	466.899	421.64	459.104	435.397	438.849	446.211	458.351	456.575	456.681	414.719	496.543	437.226	475.251	504.373	409.881	490.764	458.069	424.573	487.246	521.021	490.96	483.794	506.183	450.15	457.805	442.493
band10	475.347	480.697	479.293	417.883	491.957	431.027	480.833	460.842	404.272	442.434	446.317	454.32	448.558	423.528	484.405	476.443	486.222	507.122	457.591	526.018	469.776	490.4	431.642	497.77	511.784	490.513	537.368	481.438	467.469	460.454
band11	436.307	453.185	469.697	464.086	458.601	434.797	453.537	439.319	452.747	453.564	401.672	424.91	451.302	449.731	481.191	443.068	476.036	448.804	451.214	503.014	439.778	433.199	437.27	492.853	455.526	456.586	512.46	444.94	463.965	431.088
band12	406.033	433.464	450.978	385.623	444.33	404.855	430.482	420.204	400.344	446.351	443.499	423.876	448.264	434.419	449.235	422.858	432.669	478.942	398.794	473.104	423.598	429.851	449.387	467.816	443.712	441.739	498.929	442.211	420.915	429.001
band13	393.527	431.488	489.245	424.772	451	393.36	448.198	405.731	419.596	434.137	412.663	435.177	421.404	404.417	448.979	416.958	423.836	484.347	428.202	467.738	442.384	430.921	426.92	440.192	411.987	446.568	491.183	428.467	426.366	427.184
band14	405.857	417.264	475.571	367.049	458.929	386.758	460.453	410.891	371.126	424.201	402.763	401.472	413.841	406.331	445.637	435.501	429.345	464.029	429.254	460.231	415.912	432.971	460.445	460.702	462.838	441.504	486.75	432.946	446.514	407.631
band15	430.597	438.1	461.685	407.182	452.922	391.041	445.525	425.044	387.823	440.421	435.957	411.001	440.766	410.004	435.953	416.96	447.6	469.341	441.103	480.93	414.803	411.209	414.452	450.308	441.669	432.764	490.65	439.127	431.992	423.562
band16	400.183	428.67	440.55	360.525	433.413	397.447	432.432	395.533	379.59	421.001	425.936	411.726	396.159	418.762	456.742	410.13	444.647	446.257	396.452	442.844	426.76	406.611	427.535	450.461	397.778	424.055	484.433	413.939	418.669	412.62
band17	447.19	422.233	461.954	359.16	435.74	389.439	426.135	413.319	367.823	424.271	422.267	402.937	410.129	398.694	462.728	427.932	429.567	445.439	411.937	470.544	410.806	404.237	431.321	438.864	435.058	433.264	491.413	431.924	419.28	427.016
band18	430.45	416.1	476.831	367.438	453.28	398.644	435.007	413.347	377.216	419.03	396.312	391.934	417.299	388.351	443.366	445.188	435.458	448.611	401.329	486.272	403.046	420.116	398.764	465.172	416.975	450.139	494.776	439.322	393.956	392.881
band19	449.203	434.706	464.545	363.611	448.161	403.23	430.849	424.775	375.337	414.227	413.538	411.498	430.813	401.152	473.663	424.058	429.105	460.571	415.218	475.201	415.079	418.008	405.406	441.731	428.637	446.046	486.988	435.765	402.046	387.625
band20	450.823	439.467	459.966	366.472	456.393	395.282	436.163	415.019	376.468	426.82	404.191	397.862	417.245	400.349	454.457	435.319	422.033	436.992	439.306	478.249	408.304	408.229	407.934	466.29	422.842	450.216	493.52	414.832	412.841	397.771
band21	421.053	416.918	458.262	367.657	442.881	384.395	431.483	407.466	356.426	418.407	426.214	412.045	424.854	404.462	465.577	427.816	420.233	459.987	400.599	457.983	404.482	418.064	408.144	449.383	410.848	434.152	484.125	425.277	389.608	396.322
band22	420.917	426.333	443.458	360.506	437.406	394.118	429.572	418.448	366.493	428.26	423.303	409.229	438.97	426.4	452.637	421.772	412.036	452.341	413.552	471.768	408.937	411.681	418.796	458.921	421.548	430.159	480.891	428.119	402.916	406.608
band23	419.553	412.339	477.61	356.395	442.493	391.306	435.932	420.732	355.17	429.039	418.173	401.113	446.014	431.154	450.522	435.485	425.527	456.077	420.389	471.708	403.547	406.883	405.369	455.127	417.192	439.367	487.715	425.617	405.799	393.057
band24	440.653	427.039	471.346	358.685	434.27	399.103	424.798	422.973	358.771	413.992	400.08	389.166	418.283	394.938	463.864	416.503	416.945	455.143	396.524	471.869	406.564	399.879	399.411	442.304	423.134	431.309	490.732	418.792	394.804	389.756
band25	418.423	435.948	453.855	345.262	445.86	401.162	429.391	427.058	376.12	419.268	411.79	395.592	403.418	410.088	463.822	421.772	413.822	455.085	408.488	465.619	408.82	397.176	411.528	456.541	418.801	433.709	485.685	425.191	392.694	396.766
band26	438.543	424.024	459.944	346.645	441.597	383.193	433.83	420.49	358.757	424.219	401.257	401.367	437.522	410.439	456.214	418.547	415.044	438.796	405.813	460.715	399.227	402.971	404.796	436.726	413.619	428.541	483.524	415.677	402.274	391.622
band27	435.457	427.361	460.685	349.265	429.479	387.627	429.197	416.656	358.099	421.491	406.323	404.91	417.541	409.834	466.969	421.808	403.938	444.579	396.512	465.062	402.711	402.667	399.849	441.622	412.185	433.264	491.384	411.516	382.351	389.977
band28	413.437	442.576	456.097	342.793	444.643	382.335	429.554	417.819	356.107	412.246	410.54	396.592	407.522	407.493	466.209	412.172	410.796	450.19	411.183	449.047	395.909	394.922	407.809	440.913	405.981	422.774	481.069	407.355	389.154	389.967
band29	426.033	428.242	459.007	335.457	427.32	377.031	427.996	403.68	350.84	410.718	397.517	395.206	421.335	398.045	459.533	408.667	391.225	454.071	400.813	451.063	397.103	385.621	409.924	430.548	404.173	426.673	478.809	414.363	390.461	395.38
band30	420.157	435.061	456.058	344.219	428.004	377.041	423.725	407.291	344.475	411.975	395.599	393.196	424.808	412.341	464.123	413.006	403.171	453.347	405.052	453.521	384.845	379.76	394.22	446.284	403.548	422.399	474.939	394.45	389.856	384.026
band31	418.897	441.045	458.644	338.833	430.962	388.197	425.344	418.097	354.919	415.351	395.522	394.714	404.266	407.844	458.209	420.792	389.658	432.91	397.992	459.13	395.996	394.04	397.5	433.471	410.158	427.872	483.397	405.241	380.122	385.719
band32	410.53	423.582	456.029	335.5	429.405	379.418	417.783	406.927	341.113	407.75	396.731	388.8	403.503	399.515	450.697	417.719	395.436	438.487	397.107	450.209	390.824	397.903	393.493	435.882	399.338	423.865	473.113	397.589	386.167	376.719
band33	430.04	424.088	457.966	316.775	424.682	369.377	417.474	407.216	338.943	404.347	409.97	385.925	420.937	400.082	449.7	400.417	407.145	434.172	404.079	448.902	391.024	386.232	392.791	434.854	399.607	419.552	477.235	403.332	373.733	374.34
band34	422.303	419.755	453.252	335.241	423.156	375.52	420.65	404.011	345.635	410.069	398.066	391.607	399.786	396.63	451.872	421.044	384.902	445.452	402.333	448.932	387.931	385.759	399.436	432.98	396.254	416.022	471.061	393.69	379.87	384.069
band35	419.48	428.079	452.777	323.855	421.105	377.292	417.507	410.824	339.583	401.397	406.59	393.566	413.132	382.48	449.971	404.501	388.116	437.921	387.611	449.858	384.543	379.111	386.613	435.899	404.817	416.221	470.649	411.843	367.341	370.464
band36	423.227	431.703	462.656	321.247	423.366	358.868	411.226	403.454	341.039	404	400.371	393.662	426.071	402.349	451.671	418.387	381.96	425.751	394.635	447.749	387.103	387.855	389.005	433.591	399.043	418.775	471.626	395.633	373.225	369.288
band37	418.463	427.809	466.932	332.475	423.043	360.275	413.01	405.076	335.451	405.311	390.28	384.174	409.731	385.768	455.055	397.216	378.851	414.712	390.552	450.778	377.874	385.33	378.443	433.09	397.801	415.562	468.932	402.663	362.092	368.404
band38	424.003	419.061	446.564	318.991	417.902	364.772	408.09	402.043	329.856	398.838	390.451	384.665	416.228	393.692	452.342	400.092	378.72	425.664	391.21	441.954	376.277	379.007	383.394	434.698	391.848	417.18	464.691	397.678	370.41	369.67
band39	422.43	409.161	459.855	314.889	416.804	367.925	416.222	398.438	335.46	398.169	396.647	386.807	417.511	387.877	449.3	404.683	377.462	417.238	395.774	440.154	382.729	379.854	384.307	428.823	394.535	411.28	464.444	391.024	358.794	365.075
band40	405.92	416.782	439.482	311.429	408.048	367.135	413.397	398.088	324.757	402.313	386.604	383.574	403.566	387.583	449.42	402.816	379.676	413.881	396.246	441.259	368.015	375.494	388.17	428.368	386.191	407.826	469.357	394.623	363.255	366.109
band41	410.913	415.7	449.511	309.719	421.576	354.571	411.925	399.468	324.418	403.36	391.663	382.759	394.659	397.405	443.311	409.519	373.327	421.897	379.171	447.526	371.172	378.083	392.887	430.178	390.583	410.391	466.854	382.578	362.185	364.134
band42	420.86	402.642	449.925	318.157	415.238	354.147	408.489	401.234	326.301	398.184	386.05	373.408	405.445	383.955	446.828	399.8	367.887	418.333	391.099	436.446	376.349	369.018	388.328	425.413	383.9	407.464	462.262	390.645	362.356	361.815
band43	414.153	404.17	438.264	310.71	411.337	365.634	408.125	400.493	331.908	393.017	382.683	374.858	401.459	378.975	432.47	400.858	369.753	411.831	381.012	438.938	377.189	374.333	387.865	421.817	381.066	406.18	460.466	396.191	350.879	358.478
band44	409.817	417.612	452.855	304.361	416.735	364.308	409.097	397.421	329.206	396.062	381.271	375.198	397.33	388.474	446.778	404.874	365.876	415.225	371.873	438.887	372.832	374.838	379.441	428.835	386.096	410.378	464.419	387.521	356.399	357.086
band45	412.847	412.927	445.107	302.219	405.864	356.667	404.179	392.978	323.169	397.117	386.2	371.751	413.168	385.947	433.794	400.138	374.251	409.45	370.131	435.061	369.722	359.831	378.122	427.553	379.027	405.255	457.919	380.346	354.08	354.761
band46	416.61	416.594	437.978	298.91	407.479	347.317	406.542	393.804	325.587	388.14	379.872	370.748	395.75	378.643	436.637	393.944	366.804	411.037	383.992	434.326	365.206	358.447	382.668	423.75	377.154	401.134	465.417	388.27	352.229	359.94
band47	405.297	408.055	450.315	302.463	408.643	354.586	406.827	391.496	315.274	390.353	372.408	369.81	398.937	383.476	442.898	407.236	372.015	410.96	365.409	434.624	367.6	365.083	376.367	425.321	381.21	404.716	461.826	384.986	349.404	359.137
band48	417.227	397.679	438.627	304.228	405.992	351.834	405.562	389.8	315.587	388.97	377.811	369.146	395.646	376.209	445.347	403.665	368.738	415.77	376.623	436.991	369.755	368.506	377.213	424.391	382.276	402.566	458.004	383.062	345.6	354.411
band49	412.193	401.312	443.891	298.34	406.952	352.159	401.266	392.54	323.605	389.232	380.781	374.864	406.033	377.113	435.245	403.03	353.124	401.701	371.099	433.033	367.231	362.569	372.601	426.37	371.849	402.378	461.578	379.753	349.045	351.512
band50	409.03	412.294	448.625	294.13	406.145	351.456	401.955	387.425	315.598	390.828	374.018	368.779	403.179	380.943	440.183	404.275	368.611	418.563	364.921	431.361	362.715	363.744	376.197	426.717	375.51	403.385	457.261	376.888	346.773	354.704
band51	415.78	397.336	444.964	295.343	404.617	353.484	404.589	389.642	312.786	387.402	373.089	370.64	404.151	372.665	436.7	405.391	365.509	414.323	379.54	430.355	366.193	364.587	377.374	427.108	379.954	403.253	455.929	382.491	346.003	354.602
band52	412.657	406.424	433.898	302.309	401.782	351.855	402.199	391.466	316.449	387.444	374.608	370.967	401.967	379.544	441.744	389.657	363.753	407.283	368.937	430.889	364.47	355.344	377.773	417.407	377.003	400.349	456.68	374.41	346.042	351.793
band53	412.013	407.548	445.586	286.833	404.917	349.058	401.961	387.998	304.818	384.512	382.153	367.847	411.022	375.033	435.527	398.309	358.724	403.307	378.139	434.724	362.436	356.626	376.129	424.935	376.134	404.329	456.403	381.646	346.286	353.338
band54	420.25	403.782	430.312	283.003	400.4	345.116	402.486	388.074	311.41	389.021	376.062	367.171	403.069	375.17	441.943	400.733	356.527	410.852	371.067	429.901	359.065	355.819	383.115	418.923	371.256	399.508	460.057	376.493	347.284	353.078
band55	402.183	401.339	439.768	291.198	403.99	347.985	402.57	385.046	311.13	382.801	376.549	371.131	403.162	373.645	436.433	404.497	352.869	405.164	362.46	427.147	363.281	358.135	370.583	426.836	372.427	399.686	456.663	377.61	343.456	342.754
band56	411.77	394.297	435.09	284.222	395.928	341.894	400.04	387.089	302.386	384.627	378.672	367.307	400.709	367.979	433.413	395.559	352.222	395.677	370.282	426.091	358.604	356.794	374.991	417.939	368.836	397.901	457.683	374.252	340.477	344.478
band57	400.263	402.452	438.235	281.79	404.614	346.162	398.963	386.629	306.507	383.302	372.191	367.584	405.819	369.478	435.272	393.707	346.2	396.455	365.274	424.257	362.083	354.106	370.285	417.412	369.322	399.073	450.799	373.796	339.417	343.481
band58	413.363	400.161	429.923	279.704	396.072	339.882	399.262	382.96	303.927	384.506	384.774	365.852	399.703	373.766	433.752	392.709	350.225	393.063	364.766	424.481	355.592	346.613	365.489	417.615	365.093	396.699	452.125	373.54	337.145	343.85
band59	405.96	396.539	430.877	280.799	395.889	340.224	396.795	383.284	308.577	381.31	374.394	360.313	397.212	368.817	430.433	397.267	344.425	403.373	360.464	427.768	353.271	354.074	371.652	418.557	368.092	395.356	452.185	370.951	334.317	343.476
band60	401.197	395.394	431.617	280.333	392.247	349.162	396.067	383.509	307.823	385.135	375.415	362.162	396.272	372.261	435.128	393.922	350.6	399.19	359.135	421.242	357.763	348.123	369.376	417.332	364.697	394.781	447.47	372.861	338.576	338.479
band61	403.803	404.697	432.988	281.099	392.039	341.992	396.088	381.712	301.575	380.52	366.786	361.674	397.964	369.643	429.943	387.188	341.64	397.767	351.167	419.086	357.147	347.25	367.904	412.701	366.16	392.83	450.158	374.12	334.237	340.909
band62	401.5	391.152	425.131	279.898	390.159	337.044	393.867	380.47	298.392	378.797	371.253	362.577	398.714	366.634	428.407	393.305	339.582	396.825	354.643	423.698	352.038	345.978	365.901	411.01	360.953	391.965	450.567	369.719	329.926	338.602
band63	404.49	404.267	428.847	279.895	391.242	332.944	391.738	377.235	298.305	381.065	369.526	360.67	397.78	366.795	431.292	387.575	344.48	394.114	359.706	417.915	349.965	345.044	370.172	412.605	362.561	393.173	452.078	363.634	335.101	341.386
band64	405.847	388.688	424.443	278.935	389.933	333.712	392.267	375.506	296.765	378.397	367.039	363.447	400.343	365.889	431.446	388.367	342.953	389.841	360.599	420.213	351.343	342.34	366.339	411.719	359.341	392.326	449.564	365.909	334.006	336.532
band65	401.367	392.391	424.688	276.037	385.613	340.648	392.72	378.42	296.271	376.313	371.64	361.215	393.786	362.552	426.546	392.493	338.553	397.032	352.837	419.137	350.342	340.757	362.218	412.197	357.328	388.934	447.441	366.999	330.667	338.391
band66	400.643	389.373	422.097	279.463	387.044	337.617	390.345	379.203	298.754	374.603	369.788	360.191	395.986	365.218	431.969	385.756	337.113	389.323	356.377	420.485	349.288	345.211	359.816	408.502	357.086	389.386	447.8	363.62	326.388	336.451
band67	402.423	386.603	433.886	271.62	390.979	330.108	389.06	378.027	302.071	374.229	371.159	360.028	396.066	363.304	426.59	387.685	334.204	383.804	352.421	421.288	350.633	342.297	360.129	415.938	362.826	391.272	447.292	363.69	324.812	330.33
band68	394.787	390.855	421.22	275.849	386.185	331.375	391.176	373.77	299.099	373.321	366.189	354.864	388.61	362.191	430	390.627	334.604	382.241	349.77	418.3	348.706	340.861	357.553	408.639	355.83	388.196	448.257	360.4	324.442	331.27
band69	409.61	388.936	429.324	270.648	387.988	334.911	389.125	379.747	298.502	376.059	364.2	357.684	388.341	365.304	424.937	387.902	333.815	384.061	348.925	419.068	351.661	340.516	355.206	411.677	355.366	390.466	446.301	366.446	326.353	333.818
band70	395.823	390.77	427.525	271.63	387.241	336.358	388.978	376.005	292.724	374.757	365.886	354.687	393.151	362.341	428.332	387.271	332.815	385.056	347.381	418.977	349.243	341.15	361.911	414.335	357.272	389.977	446.659	361.503	326.382	335.07
band71	400.36	386.703	424.877	269.735	387.841	338.638	389.925	375.375	294.253	372.723	365.761	357.995	394.409	361.538	421.261	390.479	334.109	385.005	355.381	417.981	348.989	339.336	360.144	408.237	351.963	390.362	447.4	365.535	323.04	332.643
band72	407.157	387.694	423.823	274.151	385.564	337.88	387.028	378.839	293.276	375.072	366.481	352.889	394.973	356.916	422.031	385.507	333.28	382.889	357.048	415.861	349.157	336.748	358.716	407.455	352.885	388.449	445.221	362.451	325.406	337.481
band73	397.26	387.958	424.726	267.102	388.962	332.673	386.554	374.727	292.626	372.491	369.223	354.105	389.31	362.326	423.063	387.601	333.149	385.77	348.837	416.422	347.804	334.206	359.426	410.909	354.325	388.35	449.051	360.819	323.996	329.065
band74	398.21	384.479	426.143	267.556	386.721	330.11	387.013	374.918	293.233	372.886	366.604	352.726	393.206	361.429	425.661	388.563	330.171	383.722	349.333	419.463	345.099	334.314	356.232	406.677	352.016	387.09	447.138	360.758	324.853	333.466
band75	401.557	383.506	421.102	271.627	387.564	331.302	384.461	370.629	292.402	371.072	364.765	354.866	393.212	359.688	422.744	386.14	329.971	381.693	352.373	415.68	346.579	334.187	350.113	408.686	351.013	387.094	449.026	359.286	318.865	329.567
band76	401.7	385.618	423.564	264.744	383.804	333.023	389.564	374.281	293.075	371.831	366.064	354.769	393.467	358.936	424.48	386.289	327.502	386.651	352.127	415.405	347.388	329.593	352.814	407.773	350.185	387.992	448.86	359.191	322.07	330.667
band77	395.577	382.664	422.697	268.33	382.865	336.652	387.644	372.788	292.071	371.592	367.18	354.168	389.629	355.273	420.159	384.144	331.062	380.336	348.877	418.999	347.727	334.894	356.032	408.79	348.363	387.122	447.096	357.238	318.742	330.183
band78	402.793	380.867	425.034	268.543	385.143	331.988	383.476	373.513	289.862	370.131	365.608	355.362	392.637	359.552	421.499	389.453	328.513	381.69	346.194	415.343	345.103	334.647	354.145	410.609	351.886	385.56	447.282	359.957	318.575	326.464
band79	401.05	384.13	422.097	266.664	379.426	327.675	385.779	371.004	289.788	369.178	359.907	351.288	387.242	355.801	417.452	386.279	332.255	380.897	345.456	413.928	343.066	332.165	353.358	410.021	352.987	384.321	446.313	357.102	317.712	331.187
band80	402.517	385.845	420.722	264.673	382.383	332.24	383.824	370.531	286.64	369.98	363.339	354.43	389.904	354.745	422.551	380.537	326.716	383.246	344.813	415.087	340.567	335.128	354.014	408.592	351.563	384.432	446.744	360.342	317.957	328.481
band81	396.18	381.458	420.877	268.373	383.106	333.867	383.786	368.32	285.494	369.132	362.269	354.509	391.387	358.195	417.292	388.585	329.785	379.206	345.131	413.773	342.35	333.775	352.348	410.62	351.64	385.371	445.602	355.744	318.937	326.062
band82	404.897	382.503	419.446	265.435	379.957	334.484	386.198	371.461	288.146	370.103	359.091	354.024	395.352	355.988	414.89	388.739	321.836	377.923	343.528	417.338	343.552	331.143	350.768	408.985	348.969	382.327	445.156	360.993	319.229	328.075
band83	396.3	382.415	418.053	263.364	379.903	330.054	383.657	368.763	288.183	367.705	362.56	353.915	387.898	352.287	425.757	387.699	322.495	377.325	342.171	413.748	339.885	329.72	349.168	410.938	345.916	384.079	446.376	355.165	316.188	323.058
band84	404.117	384.315	417.93	266.056	381.707	331.456	384.768	371.005	286.423	368.603	362.872	352.857	389.503	355.39	420.436	385.248	323.909	377.524	341.778	415.109	344.824	330.956	349.404	409.058	347.117	385.432	446.122	358.922	315.123	324.788
band85	404.547	382.17	416.356	259.272	384.068	326.124	382.389	368.786	288.013	367.378	363.567	353.16	393.934	357.226	417.65	388.884	324.887	375.529	341.548	414.396	338.872	334.63	346.972	409.553	347.91	385.648	445.526	356.223	315.798	322.599
band86	401.533	378.873	418.07	263.012	378.482	329.203	382.623	368.592	285.19	368.175	363.03	350.415	390.014	355.353	414.504	389.527	318.84	381.495	343.444	412.407	343.272	328.061	350.537	408.594	345.523	382.245	443.347	358.683	315.167	324.74
band87	401.783	383.579	422.073	258.59	379.9	326.603	381.907	369.722	288.1	368.858	359.474	354.046	392.547	356.735	420.533	384.89	326.055	374.011	339.988	413.192	342.209	328.1	348.902	411.295	345.889	382.447	443.106	354.861	312.5	324.857
band88	400.197	379.397	421.511	259.17	384.3	330.362	382.612	370.591	285.451	368.686	360.235	352.161	393.593	356.055	415.491	388.531	318.913	376.405	338.524	415.992	341.095	329.256	348.371	411.724	347.727	383.466	443.65	356.041	313.605	324.34
band89	402.28	379.855	411.731	257.102	375.869	327.222	381.048	366.73	283.191	366.979	357.95	347.409	386.088	350.374	416.606	384.725	320.775	374.762	340.893	413.649	341.362	327.337	346.968	407.009	343.691	380.959	442.059	354.157	313.072	324.73
band90	399.867	377.952	414.153	259.762	377.301	322.58	379.447	367.78	280.859	365.329	358.276	348.851	391.349	349.945	418.175	387.83	317.516	375.593	341.944	410.747	340.228	328.825	348.482	409.014	344.654	381.254	441.675	353.165	310.897	321.289
band91	398.473	380.788	419.504	257.167	379.97	320.747	381.167	364.145	280.353	367.686	356.474	348.664	385.132	349.717	417.037	386.146	322.709	375.185	342.563	412.382	340.714	329.851	350.106	410.566	344.657	381.485	442.01	353.46	310.977	323.624
band92	400.59	378.042	416.625	254.716	378.021	326.077	380.182	366.806	282.575	364.723	354.868	347.023	390.874	351.021	415.585	388.964	322.204	371.81	334.635	410.412	342.33	325.952	345.365	407.22	343.586	381.115	442.752	351.966	307.123	319.849
band93	401.733	375.03	414.659	258.077	377.768	324.429	378.636	367.294	282.434	364.067	359.754	345.436	386.096	353.136	416.264	385.667	315.356	370.389	337.238	413.092	338.201	327.225	343.601	408.571	345.709	380.402	441.907	354.732	309.272	316.395
band94	395.41	376.327	415.625	259.451	376.075	322.162	379.532	365.106	280.128	363.941	356.075	346.366	389.234	348.702	416.104	383.625	312.993	375.386	339.329	410.021	339.826	323.514	346.161	406.983	339.037	378.586	439.809	352.859	309.637	318.912
band95	393.693	378.121	413.252	250.96	376.836	324.435	376.182	363.611	278.429	364.267	353.419	343.551	386.841	349.382	411.611	386.331	316.898	373.354	336.063	408.361	336.942	328.723	347.78	408.43	339.962	377.13	442.1	352.989	309.715	320.488
band96	397.96	371.488	414.395	258.256	374.949	321.814	377.336	362.788	283.818	364.045	355.023	345.824	383.797	351.115	412.864	385.323	312.131	372.146	336.603	409.825	339.124	324.149	342.418	404.99	339.874	378.652	438.946	349.942	309.094	317.824
band97	397.653	370.77	409.644	253.309	374.98	321	374.083	358.676	280.237	361.765	353.683	345.041	389.179	348.852	414.11	383.836	313.313	372.701	335.877	406.841	336.473	322.779	340.768	403.624	337.177	375.382	439.135	348.942	305.741	315.35
band98	399.453	373.636	409.448	254.506	374.071	319.348	373.737	359.954	279.154	362.237	358.321	345.058	387.863	348.887	413.089	384.697	317.836	372.275	334.528	405.285	337.328	322.889	343.81	403.948	337.238	374.398	436.445	348.963	305.119	319.047
band99	398.807	370.321	406.322	257.63	376.176	321.725	372.73	358.158	277.919	360.238	354.772	342.978	387.505	348.856	413.948	386.176	314.189	369.442	336.302	407.928	337.575	322.772	341.672	408.793	338.431	376.446	434.825	347.773	305.471	317.035
band100	397.093	371.761	408.881	254.006	372.151	320.211	371.172	357.567	274.703	359.603	357.339	344.213	385.055	345.464	408.909	383.236	312.942	370.167	331.833	405.937	333.529	321.321	339.67	401.475	334.155	373.62	435.367	348.203	304.301	315.742
band101	392.927	374.136	410.036	252.296	372.479	322.255	372.509	358.696	276.822	359.777	353.522	337.738	385.275	349.066	410.091	382.088	317.185	365.444	331.698	405.782	336.782	321.92	339.949	403.747	335.366	374.39	434.349	348.281	303.41	314.367
band102	387.557	369.515	407.339	248.256	373.434	317.549	370.607	357.652	275.498	358.38	357.838	340.422	387.799	347.055	409.995	380.717	309.087	365.966	333.127	405.697	330.712	322.407	337.917	401.206	335.167	373.716	437.37	345.095	303.96	314.266
band103	393.7	366.961	409.864	254.42	372.082	318.834	370.487	357.08	273.259	358.591	349.631	338.036	382.157	342.269	410.486	383.184	309.189	366.511	329.603	402.066	332.998	321.862	337.014	402.156	333.774	372.568	434.185	345.259	302.044	311.674
band104	391.563	366.376	406.741	251.812	370.046	318.768	371.426	356.142	274.449	358.514	351.784	337.556	387.11	345.85	407.658	384.595	315.902	366.804	334.599	404.164	332.94	320.139	340.413	402.625	335.679	370.12	432.174	346.537	303.122	312.674
band105	394.847	365.758	402.489	251.744	367.187	316.932	369.57	356.081	275.548	357.883	353.759	339.999	383.346	342.076	404.23	379.762	312.258	363.746	328.46	402.881	333.58	319.267	336.259	399.474	333.907	370.209	433.014	344.619	303.052	310.685
band106	395.87	367.2	406.317	251.247	371.26	320.05	369.992	356.552	276.316	357.145	350.032	334.891	382.481	344.747	408.961	384.964	309.553	360.619	328.238	403.226	333.284	321.703	337.316	399.912	335.715	370.071	430.656	344.302	300.986	306.036
band107	392.247	363.239	401.528	250.463	368.21	318.118	370.376	356.45	272.535	356.663	347.665	334.634	379.319	341.131	409.073	378.613	307.716	365.743	330.052	400.374	331.751	316.963	335.851	398.695	330.715	369.586	431.439	344.294	298.145	308.998
band108	390.703	361.176	405.165	246.333	367.58	315.296	367.631	353.456	274.078	356.236	352.344	336.022	380.442	340.423	401.82	375.519	305.935	360.246	329.302	401.07	330.136	316.293	333.53	397.934	329.585	367.956	430.402	342.535	299.536	308.833
band109	388.177	360.067	404.603	248.571	368.732	314.389	367.436	352.298	273.63	356.002	346.041	334.634	381.618	339.505	404.277	380.812	309.713	361.037	328.29	399.651	329.269	318.497	333.837	396.36	329.39	366.794	430.47	340.948	299.573	309.745
band110	383.613	365.267	398.898	244.278	365.889	313.358	364.459	350.875	270.627	354.045	346.961	329.826	380.739	340.963	405.789	379.226	304.24	360.085	327.226	397.158	326.948	314.067	331.195	395.813	327.442	366.001	427.091	340.728	298.852	305.958
band111	387.4	360.182	400.923	246.037	366.468	311.776	365.034	349.414	270.976	352.529	346.599	331.738	380.201	339.39	401.616	379.892	306.611	361.341	330.567	399.184	329.133	315.607	334.41	395.557	328.866	365.879	429.748	340.268	297.28	307.167
band112	386.92	357.152	404.707	245.105	367.487	311.242	365.611	348.874	267.712	352.046	348.941	330.411	377.596	335.774	403.3	378.186	304.8	361.728	325.095	398.673	326.563	315.531	332.934	394.355	326.771	365.232	426.914	339.758	297.604	306.597
band113	383.967	361.545	398.869	245.417	366.175	311.638	363.961	350.977	270.133	352.068	343.968	331.187	377.291	336.376	399.298	380.303	304.502	365.013	326.306	399.799	326.401	314.497	330.477	397.415	324.372	364.19	426.905	339.314	297.1	302.267
band114	384.78	361.006	395.801	250.071	363.102	313.07	362.004	350.875	268.702	351.283	343.096	329.043	375.516	335.127	398.41	376.202	304.564	358.939	324.845	397.803	325.775	314.214	329.7	393.638	326.276	363.342	424.728	338.831	296.255	302.883
band115	384.543	354.458	396.317	245.741	363.764	311.592	361.907	347.42	267.76	351.43	342.182	328.496	376.376	339.509	398.366	377.369	305.458	359.709	324.897	396.459	326.64	312.258	328.27	394.397	321.479	360.701	425.535	336.742	294.905	303.252
band116	381.077	356.391	397	241.951	363.96	308.234	363.068	346.927	264.511	348.52	339.522	326.107	372.448	334.444	396.911	378.028	302.109	361.696	319.032	397.69	323.598	310.528	327.477	393.123	324.09	361.822	424.858	336.895	293.818	299.631
band117	384.777	354.745	397.976	240.645	364.204	309.917	362.499	346.171	264.828	347.328	343.563	326.398	373.615	331.057	397.193	379.391	302.513	355.37	314.937	397.404	323.621	312.064	326.47	392.563	323.024	362.301	425.822	336.239	290.817	299.557
band118	383.807	357.755	398.649	243.417	362.88	307.791	363.51	345.126	265.63	347.366	340.321	323.346	373.426	333.998	395.178	375.427	304.309	361.931	324.563	393.349	323.501	310.117	328.172	393.198	321.699	360.852	426.02	333.22	290.8	299.315
band119	382.11	353.727	396.225	241.191	365.824	309.294	365.536	343.499	264.169	347.568	339.872	324.217	370.574	332.626	395.068	378.549	300.676	362.839	319.131	397.651	322.578	312.291	322.473	393.919	321.434	361.159	426.558	335.876	290.437	296.836
band120	384.813	358.467	399.656	237.873	366.494	308.228	366.139	346.272	261.241	347.052	343.091	325.247	371.788	328.536	397.473	379.523	300.316	360.302	322.694	398.065	321.038	311.782	325.174	394.431	321.864	361.649	428.647	335.866	290.208	295.972
band121	386.183	357.085	401.586	239.074	366.626	307.615	366.267	345.615	261.699	345.998	339.134	323.483	370.44	331.63	399.24	381.717	304.804	363.923	314.004	400.228	322.383	315.933	322.427	397.132	324.056	363.293	430.282	333.852	291.493	293.424
band122	385.41	360.5	403.47	242.444	368.355	310.588	366.687	346.625	263.381	345.865	338.633	319.733	367.879	326.363	402.047	383.359	305.502	362.013	317.131	399.469	322.527	312.787	322.096	397.837	325.1	364.64	431.92	335.822	291.237	297.407
band123	385.49	358.952	404.893	243.682	370.499	311.687	368.474	348.038	264.715	346.408	336.294	320.348	367.915	330.458	402.543	384.95	304.269	361.981	308.929	407.077	326.484	315.804	321.809	399.852	327.363	364.816	434.573	339.4	292.064	292.275
band124	391.92	362.767	406.889	241.602	371.752	309.764	369.737	349.597	263.3	347.896	336.601	320.223	368.247	333.357	400.269	384.892	308.182	363.196	311.623	406.317	326.473	317.018	324.36	401.116	329.1	366.052	435.986	336.619	291.443	293.586
band125	392.947	359.545	409.022	239.096	373.99	310.917	371.242	349.718	264.989	347.246	334.622	317.632	362.113	331.752	403.436	388.084	308.498	368.444	314.758	405.342	325.93	319.127	319.557	402.55	329.362	366.838	436.505	340.876	292.43	294.048
band126	396.57	361.233	412.041	241.151	376.969	310.586	372.325	351.06	266.173	347.974	333.175	317.504	364.445	329.741	405.525	391.363	308.64	369.124	313.647	409.516	327.964	318.525	318.259	403.009	330.226	368.462	437.678	340.24	291.547	291.153
band127	397.287	365.624	411.579	247.373	377.33	318.041	373.974	353.684	271.423	349.333	335.244	316.113	364.214	336.554	405.632	390.854	310.324	373.894	314.679	409.997	331.253	321.232	321.486	408.191	331.03	370.8	440.916	342.166	293.39	294.638
band128	401.427	368.791	418.586	244.957	379.924	320.925	376.309	355.658	270.755	352.491	334.781	317.494	363.041	338.632	406.332	395.465	314.531	372.683	316.437	413.061	332.392	321.55	323.094	409.733	331.731	374.029	441.282	345.19	296.382	294.659
band129	402.49	368.758	418.499	247.133	384.317	319.843	378.206	358.877	273.034	356.341	336.378	318.279	360.734	339.864	409.671	400.028	311.647	374.635	317.004	418.417	335.545	326.694	325.037	415.64	337.688	375.503	444.746	346.353	296.259	295.562
band130	406.907	371.109	421.644	248.62	387.685	322.692	384.099	362.939	277.287	359.065	341.774	320.16	363.33	343.698	417.548	403.311	317.135	376.151	324.925	421.252	338.786	329.468	330.915	417.716	338.307	378.18	450.521	353.106	299.766	298.68
band131	409	375.076	423.211	249.253	392.392	323.838	386.699	364.656	276.818	360.708	340.633	321.294	364.824	343.817	419.695	409.75	316.535	379.815	324.127	426.705	339.592	329.915	329.543	419.791	340.391	381.095	454.243	355.373	302.316	302.162
band132	416.61	377.927	429.564	252.852	393.175	325.847	391.02	368.413	278.499	363.75	345.087	325.102	370.341	350.634	420.204	411.234	318.989	382.598	326.226	430.068	344.522	334.311	327.573	421.536	344.53	386.709	458.5	356.138	303.923	303.175
band133	418.053	384.464	433.586	252.904	397.383	331.217	395.676	372.105	281.438	368.975	348.733	332.217	375.283	353.478	428.24	413.834	319.309	386.892	330.964	434.062	347.581	338.16	335.842	429.087	346.871	388.975	462.281	362.669	309.623	306.545
band134	419.34	388.952	438.143	260.142	402.216	335.973	398.583	375.131	283.95	371.489	350.811	332.296	376.129	354.22	432.219	418.822	322.211	392.138	330.377	436.962	350.01	340.558	340.018	436.116	352.66	391.752	468.118	362.772	309.498	307.835
band135	423.287	390.961	445.356	259.33	404.315	338.789	403.722	379.477	285.744	376.738	352.503	333.426	379.313	360.501	434.708	421.768	326.433	396.183	337.528	441.223	353.391	342.319	342.218	438.418	352.117	394.82	470.637	367.18	313.697	314.9
band136	430.597	391.5	447.586	263.503	409.412	343.153	407.681	383.231	288.412	379.075	360.738	342.377	386.338	362.002	442.11	428.709	333.149	402.823	342.004	447.439	358.19	345.697	348.463	443.001	357.291	399.739	477.648	372.249	316.214	316.92
band137	437.177	396.015	453.504	261.096	414.759	345.108	415.29	387.749	289.793	383.431	366.285	345.64	390.541	364.322	447.287	431.072	333.396	408.04	346.845	451.281	358.78	349.896	349.848	443.084	360.353	403.511	482.779	375.649	318.135	320.212
band138	436.023	401.952	459.266	268.864	418.1	346.708	421.329	391.425	294.491	388.223	367.526	350.159	397.602	371.875	453.906	440.178	337.4	412.217	348.516	456.682	365.22	354.921	352.209	451.021	363.151	408.837	488.762	381.249	322.617	321.061
band139	440.41	406.2	465.097	272.127	426.949	351.679	423.214	392.917	299.509	393.196	370.907	352.982	400.025	375.825	458.407	442.583	346.131	413.185	349.004	461.897	370.327	357.741	357.376	456.192	369.631	412.812	494.016	381.792	325.279	326.705
band140	447.95	406.718	468.092	272.204	426.948	353.141	428.849	399.565	302.598	395.678	372.797	356.814	401.629	378.694	461.342	449.611	345.08	419.722	355.734	467.956	370.283	361.948	360.447	459.261	371.663	417.385	498.154	383.546	329.866	330.493
band141	449.607	414.339	468.245	275.478	430.437	357.128	433.528	400.892	302.499	398.666	376.831	359.745	407.121	378.793	470.358	450.333	349.775	423.799	354.96	469.165	374.009	361.731	364.106	462.371	370.514	420.069	505.296	389.191	331.472	329.038
band142	456.463	414.585	474.366	274.531	434.487	357.89	435.762	404.333	303.611	403.122	378.979	364.436	408.637	381.994	466.896	454.279	350.345	424.802	357.73	475.919	375.73	364.538	364.004	467.609	375.926	422.504	505.695	393.282	334.083	333.07
band143	459.043	418.003	477.666	274.586	435.266	359.348	439.078	407.143	306.31	404.177	381.021	367.671	412.341	383.211	470.99	455.02	349.971	429.931	361.679	475.373	377.976	367.595	363.381	469.668	378.349	425.207	508.909	392.713	333.928	333.471
band144	457.11	419.094	474.208	274.049	438.066	363.014	440.538	408.304	304.733	404.734	383.718	368.671	414.53	385.129	474.311	457.116	353.167	429.159	362.762	478.988	378.095	368.896	367.628	470.051	379.058	426.135	512.119	395.918	335.28	335.037
band145	462.52	419.364	481.525	279.765	439.344	362.793	442.351	408.777	305.417	407.585	385.745	371.343	415.934	386.858	475.606	461.707	358.295	432.677	359.802	481.347	381.057	370.887	370.466	473.26	382.876	427.073	513.611	397.275	337.572	338.74
band146	462.77	419.921	484.753	279.133	441.106	365.696	444.476	412.058	308.238	409.984	384.23	373.172	415.387	389.283	476.373	461.605	356.509	433.862	367.52	482.269	381.251	373.261	371.291	474.94	381.572	429.305	515.29	399.419	337.388	338.185
band147	468.013	424.639	485.511	281.602	443.485	366.044	446.199	414.321	311.496	412.499	383.708	375.34	419.195	391.723	476.266	462.902	358.48	435.656	367.742	484.387	385.716	373.606	373.495	476.428	381.678	430.87	518.842	401.535	339.865	340.795
band148	468.673	423.639	489.995	283.88	448.219	370.155	448.159	417.076	313.481	415.491	387.497	381.595	419.761	395.821	478.287	466.355	358.284	435.053	372.171	487.999	387.403	375.109	374.181	481.054	385.932	432.549	520.009	400.598	342.002	343.621
band149	470.077	425.309	492.07	282.951	448.224	373.609	450.547	419.562	316.726	417.216	392.636	380.286	427.442	392.072	483.191	469.954	356.135	437.349	372.071	491.809	388.694	375.722	375.668	481.191	387.904	434.109	524.886	405.254	343.558	343.325
band150	471.803	428.239	495.165	286.596	450.225	373.867	452.902	419.416	315.442	420.381	392.487	386.685	427.959	398.468	486.948	470.038	362.24	440.849	370.571	494.099	392.501	377.832	377.7	481.91	388.628	436.307	526.666	407.058	345.494	342.349
band151	473.58	431.779	496.01	284.633	455.196	375.803	453.759	421.179	317.156	421.827	391.859	386.617	422.901	399.349	483.454	475.311	362.909	442.243	378.234	497.679	392.268	379.896	381.688	487.754	390.749	439.034	527.816	408.305	346.948	348.628
band152	475.65	434.909	498.308	287.948	455.326	373.754	456.925	423.426	318.269	422.071	392.175	390.026	428.198	399.146	486.457	475.679	365.036	443.511	377.123	498.326	392.9	382.296	380.089	488.425	392.254	440.225	530.883	409.26	348.234	345.103
band153	478.27	436.148	499.511	292.475	457.565	376.277	456.978	425.019	321.708	424.818	395.535	390.739	425.121	402.339	491.164	477.673	362.08	443.661	376.409	499.253	393.696	381.823	383.768	490.568	393.904	442.29	531.15	409.705	349.377	351.485
band154	476.067	433.845	502.039	292.37	457.891	378.458	457.828	424.691	322.308	426.394	396.649	392.334	430.022	402.06	490.624	479.689	360.156	444.825	376.139	503.67	395.693	383.561	383.75	491.86	394.651	443.146	531.866	411.338	349.134	350.798
band155	479.97	436.136	507.199	290.34	458.474	381.375	461.798	429.338	321.643	428.01	397.362	393.596	431.852	402.805	490.232	484.657	366.498	451.024	384.23	504.787	396.416	385.827	383.287	494.173	394.688	445.137	535.741	414.208	350.027	350.679
band156	484.317	439.97	505.308	296.272	460.245	381.375	462.545	428.531	320.574	430.398	401.995	397.692	431.582	404.604	492.702	484.006	367.865	450.601	383.262	506.611	397.697	385.12	386.663	494.434	400.061	446.814	536.677	413.002	356.869	353.055
band157	484.64	439.121	509.722	296.099	464.838	382.333	465.199	431.79	326.608	433.097	405.745	399.354	434.316	407.965	496.042	486.148	369.196	456.934	383.476	512.247	398.357	389.965	390.023	499.199	401.154	448.809	538.74	416.928	358.035	357.304
band158	484.91	437.367	508.659	294.889	465.704	387.054	466.756	432.85	327.556	432.929	405.451	396.988	436.712	406.856	496.54	489.186	364.716	456.14	382.972	511.616	401.117	388.97	390.241	496.946	402.126	448.765	539.964	417.305	354.915	354.158
band159	485.783	439.952	513.22	294.074	468.666	385.716	468.23	431.641	324.452	432.644	409.103	401.951	437.464	405.468	503.877	493.172	369.4	456.955	382.167	513.81	401.117	389.967	388.014	499.566	404.341	450.887	541.733	417.918	356.011	354.044
band160	488.783	445.376	514.438	295.302	467.814	387.267	468.67	434.417	331.428	435.677	405.674	403.199	437.126	410.179	498.875	490.816	375.684	458.087	383.877	511.591	402.063	391.087	388.262	498.837	404.093	452.13	541.232	418.148	358.585	354.832
band161	489.227	439.864	512.554	295.639	468.501	383.563	470.937	434.665	328.853	435.51	405.768	404.742	438.942	407.357	499.624	492.108	370.709	459.365	387.798	514.013	400.608	391.673	391.271	498.091	402.799	451.404	545.122	417.279	358.176	355.175
band162	486.247	443.715	514.811	303.583	469.961	387.408	472.774	435.343	330.371	436.9	407.563	406.097	441.324	409.363	500.765	493.97	373.222	458.884	389.171	518.302	404.339	393.293	391.351	503.351	405.594	452.963	548.033	421.577	360.969	355.801
band163	490.057	446.339	519.39	296.238	473.333	386.433	475.567	436.897	331.784	438.547	407.884	410.051	439.819	409.402	506.862	498	377.702	461.823	387.155	521.329	402.859	396.488	390.122	505.667	407.607	455.514	549.512	420.808	361.867	360.297
band164	490.707	449.418	520.121	298.438	471.994	389.899	476.711	438.888	333.58	442.196	409.777	409.604	442.995	411.018	507.943	497.982	379.538	462.278	394.484	520.705	407.126	395.719	392.401	505.481	407.48	456.494	551.011	422.787	362.008	358.789
band165	494.417	455.582	521.891	300.83	477.518	391.545	478.299	440.537	334.112	442.036	410.74	413.268	445.536	416.32	509.337	504.036	378.622	467.5	391.099	526.17	407.198	399.312	392.734	508.547	409.77	459.142	553.823	424.478	365.559	359.871
band166	497.55	453.567	522.712	297.877	479.472	392.039	481.207	440.04	333.326	443.795	415.055	413.903	445.475	415.082	511.982	504.818	382.233	469.111	393.567	525.935	409.201	399.134	391.812	511.651	410.12	460.119	555.652	423.536	364.712	359.087
band167	492.787	450.164	524.298	302.96	475.724	390.143	480.628	441.498	335.135	444.57	411.33	413.85	443.607	415.329	509.347	503.363	380.393	469.101	395.155	528.39	408.094	400.291	395.275	508.046	410.232	460.614	556.968	426.266	364.913	357.575
band168	491.513	455.688	525.412	302.052	480.568	392.077	481.073	438.273	334.891	445.022	413.175	416.751	444.824	415.275	511.178	503.99	382.062	467.767	394.587	526.715	406.493	398.517	394.098	510.914	413.248	460.85	554.786	422.378	363.656	361.278
band169	490.937	454.27	527.366	301.259	478.44	390.872	482.274	441.352	336.874	446.329	414.64	414.437	443.887	418.357	515.705	506.461	379.182	468.344	392.96	529.53	408.24	398.917	393.911	508.727	409.706	460.556	557.048	423.467	367.538	361.346
band170	493.057	456.324	527.288	303.543	483.743	392.193	482.944	440.896	335.912	446.376	413.342	416.362	447.467	417.563	512.217	507.092	380.367	469.812	395.274	530.094	406.128	402.789	396.773	512.882	412.563	461.95	559.99	426.637	366.807	362.549
band171	496.837	452.455	527.45	301.849	482.028	391.371	483.606	444.544	337.702	447.486	411.647	419.176	447.912	419.361	515.238	507.102	379.793	470.646	394.472	531.491	408.209	401.383	395.516	512.323	413.651	464.821	558.186	428.35	366.118	361.401
band172	496.567	455.382	533.54	303.963	484.235	396.095	485.821	445.813	340.953	449.537	414.33	419.232	448.508	418.363	516.196	511.457	383.469	472.45	395.171	535.949	410.546	404.16	395.741	516.777	418.182	465.826	561.12	429.779	367.846	361.285
band173	497.783	460.118	532.557	304.269	485.498	398.663	486.461	447.07	338.729	451.39	419.752	421.301	447.464	416.546	517.418	509.691	382.88	473.968	398.46	535.612	411.219	401.209	399.436	514.45	416.895	466.707	561.511	428.901	368.742	365.838
band174	502.047	459.079	535.903	308.09	487.784	398.752	489.083	447.887	342.003	453.854	418.228	422.203	451.843	423.456	515.06	513.339	384.698	473.627	401.877	537.516	414.609	406.007	397.83	517.006	417.987	468.295	563.149	431.833	370.802	364.517
band175	499.97	462.064	534.661	308.034	487.67	395.762	487.736	448.959	342.773	454.477	417.362	424.335	449.426	424.813	518.937	513.325	384.549	473.661	400.444	536.943	415.48	404.966	400.271	518.517	418.301	467.178	564.432	432.164	371.835	365.082
band176	493.617	461.097	536.889	305.725	486.277	395.692	489.602	446.735	339.36	453.219	417.05	422.775	452.462	417.271	513.812	517.856	385.789	473.966	400.623	537.052	412.799	403.136	400.355	517.652	418.383	467.013	563.011	431.567	371.822	367.197
band177	501.057	459.042	535.4	304.608	486.908	395.967	486.318	446.794	343.045	454.49	419.043	423.32	448.854	419.487	512.851	513.551	388.84	475.407	399.123	538.781	411.403	406.509	397.411	518.324	419.895	469.168	563.705	430.371	370.854	364.578
band178	501.357	458.036	537.431	310.114	485.922	398.536	486.599	449.55	342.157	455.064	416.85	424.058	449.514	421.854	515.679	514.645	386.302	476.122	398.976	538.19	412.311	404.802	397.957	516.355	417.731	466.659	562.636	432.439	372.005	364.401
band179	498.707	458.273	538.276	306.596	487.208	395.855	487.72	448.716	341.956	454.321	417.052	423.511	450.654	420.589	513.93	513.818	384.044	473.307	399.242	540.562	412.778	406.608	396.216	517.958	419.38	468.605	562.963	430.238	371.511	364.19
band180	496.793	454.324	535.649	309.123	488.744	399.275	489.98	447.939	341.616	453.268	417.964	427.838	450.857	422.203	513.112	516.573	385.389	475.738	403.754	540.296	413.796	406.679	399.574	521.234	417.855	467.649	563.64	431.101	372.232	365.712
band181	496.803	459.576	535.022	309.302	487.298	399.34	487.337	449.204	343.64	458.57	417.109	426.21	451.945	423.46	515.963	514.054	389.564	476.161	400.23	540.349	413.544	404.814	398.321	514.723	418.922	467.547	564.941	432.848	373.062	368.219
band182	500.293	459.509	538.782	313.738	491.437	401.781	490.516	449.531	346.258	456.538	421.69	425.226	451.723	423.489	518.115	516.108	387.36	474.894	401.587	541.339	414.627	404.859	399.048	519.31	421.341	469.393	566.288	433.163	374.896	366.559
band183	502.473	461.148	540.923	307.133	491.088	400.317	489.233	447.564	343.914	457.072	421.665	426.81	452.437	424.61	520.117	517.828	387.727	473.413	402.151	540.775	413.205	406.592	399.426	519.772	421.631	469.259	565.713	433.97	375.737	368.749
band184	497.113	463.524	542.504	310.265	492.898	400.338	492.116	448.816	344.1	458.289	422.351	428.181	452.099	424.828	522.486	518.132	388.913	476.447	407.012	545.057	414.701	408.117	403.926	522.003	421.219	470.764	565.647	435.371	375.314	368.047
band185	504.523	460.839	542.373	311.438	490.75	401.805	492.118	452.628	348.794	461.381	421.768	430.807	456.055	427.507	521.026	520.854	389.204	478.341	407.536	544.502	417.182	408.035	403.339	520.676	422.198	470.835	567.416	434.782	380.617	370.077
band186	500.017	465.173	538.465	317.63	491.576	404.861	494.636	453.468	348.288	461.656	422.872	431.281	450.162	428.612	521.726	518.519	391.429	476.886	406.286	545.875	419.539	407.756	402.748	522.112	425.049	471.031	570.379	437.012	380.854	369.02
band187	506.227	463.37	546.131	315.892	495.94	402.257	495.359	453.619	352.63	464.043	423.61	432.469	458.657	429.06	523.144	520.926	390.487	481.548	407.214	549.059	417.831	412.003	406.559	523.891	424.443	472.788	569.765	436.986	381.761	370.907
band188	503.693	462.57	546.794	315.117	496.224	407.246	497.11	453.695	351.494	462.46	425.321	432.673	457.277	427.308	522.648	525.924	393.265	486.471	408.31	549.736	417.561	412.363	405.005	524.853	426.83	475.586	570.212	438.82	382.006	371.733
band189	506.8	464.809	545.433	319.645	500.304	409.106	495.768	454.862	355.504	464.405	419.743	432.866	457.266	426.852	524.264	525.036	394.753	482.251	408.278	551.258	420.366	413.33	405.621	525.283	428.532	474.555	572.361	441.3	381.944	374.08
band190	506.167	467.673	543.661	318.012	498.327	406.83	497.634	455.507	352.768	465.132	429.973	435.093	460.286	430.809	522.689	526.623	396.047	485.968	410.623	551.401	420.052	414.116	406.803	525.134	429.544	475.213	573.97	439.071	383.474	373.843
band191	507.04	469.442	546.349	319.682	499.456	410.3	500.629	455.314	358.008	468.755	431.219	437.58	459.28	430.912	528.057	526.625	400.502	486.873	416.19	555.596	423.462	414.357	410.459	526.572	433.139	475.926	575.974	442.709	385.706	377.193
band192	510.197	471.694	549.363	324.596	501.605	411.358	503.875	457.911	362.911	470.93	429.667	439.168	459.401	433.47	529.937	533.423	406.058	488.643	416.893	558.447	425.891	420.379	408.762	529.57	437.099	480.744	578.659	443.77	386.659	378.89
band193	513.713	474.545	556.199	329.824	505.773	413.607	505.885	460.525	364.951	473.792	431.542	443.076	463.577	437.3	533.535	534.273	408.571	492.146	420.972	562.857	427.735	422.768	413.259	535.214	434.43	483.384	581.062	446.341	391.841	380.75
band194	512.633	478.003	558.777	328.944	508.508	419.431	509.064	462.694	364.136	475.819	434.109	445.917	467.107	438.758	536.225	536.752	408.265	499.082	422.44	564.853	428.581	426.744	417.275	535.703	439.445	485.51	583.816	451.307	394.364	384.939
band195	514.623	477.9	556.593	336.549	513.742	421.153	509.612	466.636	371.272	479.752	439.574	448.646	467.473	442.953	534.661	539.539	414.273	496.138	425.762	568.974	434.776	430.154	417.074	539.799	445.154	489.227	589.404	452.771	397.812	387.189
band196	522.903	484.652	567.436	339.5	517.882	427.528	515.059	468.971	377.229	485.685	438.861	451.189	472.096	448.717	539.266	547.311	418.818	505.122	428.794	570.731	439.545	434.239	425.2	543.215	447.411	493.065	591.675	457.074	403.679	392.488
band197	525.233	489.973	569.499	346.509	519.049	430.263	520.616	472.643	381.399	489.068	443.565	456.549	476.621	449.77	543.295	545.729	427.462	503.034	435.833	577.415	442.995	441.02	428.917	546.918	451.999	495.502	598.043	462.021	406.785	394.685
band198	526.557	490.755	570.86	347.025	526.349	432.108	525.151	473.552	384.574	492.522	450.909	458.361	477.225	454.575	549.543	548.455	428.931	512.849	439.06	582.833	442.675	442.359	431.362	552.23	456.251	499.081	601.549	465.244	412.292	398.757
band199	531.947	495.527	582.366	355.549	528.273	436.515	529.058	476.742	389.402	496.907	452.731	461.325	482.332	458.086	553.264	555.778	431.429	515.788	444.159	583.723	447.475	446.544	435.023	556.642	460.62	504.801	605.246	467.664	415.092	405.549
band200	536.667	497.985	586.426	355.815	533.998	442.776	534.792	479.429	398.882	500.566	455.617	465.047	484.275	459.832	558.282	556.387	439.516	516.788	446.254	590.037	450.866	452.456	441.855	558.324	466.585	507.253	608.885	476.797	421.415	409.144
band201	537.263	504.252	589.884	368.343	538.585	445.166	539.727	482.13	403.104	505.34	460.936	470.549	492.239	461.901	558.486	562.631	446.135	525.098	452.278	595.988	455.781	460.651	445.074	564.151	472.744	512.175	616.28	477.778	427.075	414.208
band202	543.397	512.827	595.017	369.377	547.352	451.793	543.697	488.231	408.118	511.967	466.977	471.863	490.404	471.312	565.047	568.295	452.898	530.585	461.036	604.591	462.782	468.018	451.034	570.644	478.696	520.528	618.501	484.591	434.465	420.22
band203	547.277	521.291	605.315	382.901	551.79	459.926	554.943	494.036	419.232	520.067	472.938	483.598	495.959	479.07	574.883	572.814	463.764	536.963	467.083	611.869	469.928	471.718	457.86	574.208	483.566	526.123	629.073	490.664	442.999	428.828
band204	557.99	527.109	613.005	394.056	558.675	470.588	562.832	501.326	429.507	529.791	478.61	488.306	506.901	487.988	584.512	581.93	475.255	546.892	476.365	621.104	477.328	480.671	466.743	584.121	494.623	536.416	637.587	496.787	449.969	434.78
band205	566.033	538.152	621.884	400.599	572.881	476.472	571.375	507.875	438.408	537.202	490.075	497.761	515.258	496.951	590.044	590.579	482.218	553.942	482.528	632.668	485.733	492.891	474.135	594.898	503.17	544.596	648.227	507.475	459.855	447.188
band206	573.023	545.303	634.748	411.077	578.288	486.114	580.435	514.328	447.405	544.843	494.533	503.977	519.626	506.267	597.402	596.541	492.047	562.169	490.889	642.726	493.553	503.131	479.227	603.172	514.712	553.333	657.807	516.545	469.028	452.502
band207	584.1	553.27	640.777	422.207	585.843	496.091	590.753	522.503	459.457	555.077	504.157	512.095	529.332	516.08	607.217	605.257	503.015	575.976	498.282	652.969	504.012	510.333	491.012	612.073	518.628	560.389	664.807	526.966	479.23	462.264
band208	588.813	563.406	650.734	428.679	593.162	500.872	598.699	527.883	467.775	562.6	509.474	521.008	533.014	521.998	617.783	614.994	512.029	584.574	512.643	660.473	510.54	519.588	501.686	616.708	530.572	567.737	671.543	532.006	487.677	471.139
band209	595.367	568.533	658.208	439.21	601.577	509.006	609.28	532.811	477.823	570.317	518.695	526.512	540.574	528.324	621.298	614.974	524.669	591.463	519.123	666.034	515.948	527.261	505.881	626.887	537.092	577.491	681.036	541.465	495.33	480.074
band210	594.633	576.739	665.55	449.778	609.459	515.857	614.864	536.185	487.24	577.059	525.588	533.271	542.302	534.776	628.864	623.142	533.298	597.103	529.028	672.99	522.247	532.716	514.723	632.044	543.869	581.402	685.108	547.131	502.58	488.108
band211	601.05	586.506	673.562	453.664	616.964	526.104	623.563	544.398	496.629	585.756	532.809	539.396	552.734	541.809	639.219	633.212	540.084	605.997	537.143	683.867	531.077	543.068	521.656	641.184	551.665	589.975	695.47	556.383	511.839	495.149
band212	610.507	594.148	677.787	468.324	624.303	536.023	631.881	549.722	504.611	593.646	539.159	545.537	557.385	549.992	646.339	638.096	552.818	613.545	544.639	694.329	538.056	549.551	527.943	646.306	559.124	597.384	702.905	564.587	521.094	503.505
band213	620.677	601.53	691.397	479.235	635.063	545.567	640.564	559.399	515.169	603.103	545.159	552.7	565.085	560.216	654.144	643.79	560.502	621.622	552.571	703.106	549.251	560.981	537.986	656.866	572.229	608.077	713.652	572.018	531.78	515.545
band214	630.627	609.43	699.508	490.028	644.11	550.294	650.479	566.426	527.629	612.945	556.025	562.139	572.217	571.066	662.264	653.555	573.109	632.46	560.933	714.877	558.051	571.681	546.424	665.79	578.787	616.709	722.194	582.533	541.56	521.188
band215	633.81	622.394	709.046	500.552	650.573	560.491	661.277	572.215	536.305	621.369	564.312	569.514	580.582	577.665	671.963	662.212	582.593	645.024	570.119	724.277	564.087	581.873	554.645	673.471	590.589	626.754	733.03	590.515	551.663	531.541
band216	641.653	634.488	723.031	509.716	668.572	568.76	670.395	579.697	547.729	629.159	571.941	579.136	586.429	585.413	681.768	675.619	593.6	652.569	579.329	737.776	574.785	596.572	562.19	687.321	602.501	637.79	740.297	598.103	561.137	536.526
band217	655.35	638.064	730.603	519.605	672.398	581.849	682.403	585.553	560.69	639.246	579.699	586.237	593.769	595.24	690.969	680.407	613.335	664.844	592.119	745.545	581.188	604.593	572.248	693.132	610.442	645.174	750.687	609.727	571.446	548.942
band218	657.397	654.252	736.85	533.701	684.82	593.526	692.568	596.103	572.464	648.632	589.219	593.06	600.357	607.232	697.253	689.503	618.433	673.071	598.742	757.538	593.717	613.289	581.624	705.15	621.607	654.509	760.11	620.31	580.539	557.885
band219	668.11	660.867	747.247	540.812	690.184	601.052	699.139	602.878	581.733	655.019	594.435	600.46	607.371	614.263	707.016	699.549	633.855	682.86	601.778	766.283	601.254	619.932	586.61	712.356	631.103	661.937	766.179	628.938	587.999	564.281
band220	673.507	668.345	756.729	547.309	696.103	604.704	706.625	607.546	585.135	663.309	599.257	603.853	613.731	621.431	715.901	703.733	640.356	688.831	613.909	773.163	606.412	632.789	596.147	719.835	639.362	669.483	772.475	632.076	596.535	572.2
band221	678.36	670.815	767.77	554.009	706.484	612.385	716.536	611.437	594.488	668.678	609.408	612.365	615.151	628.199	724.17	711.044	649.465	697.455	622.294	781.372	612.469	639.121	599.115	724.627	643.397	677.495	781.128	642.365	605.704	578.01
band222	683.11	682.348	776.433	567.256	710.429	619.402	721.667	616.757	603.942	676.732	612.544	620.447	621.418	633.721	728.225	718.128	653.884	702.32	625.25	786.755	620.803	647.738	608.821	732.505	651.762	683.343	785.493	650.478	610.28	586.738
band223	685.2	692.276	779.07	573.636	721.285	627.412	729.478	623.952	611.313	682.077	618.144	623.83	633.137	638.776	734.898	722.719	666.527	708.606	632.389	798.398	629.59	657.188	615.541	740.891	660.908	691.815	794.157	655.233	618.112	594.741
band224	694.453	696.639	786.516	582.698	727.006	632.203	737.382	627.816	620.964	687.886	623.875	629.477	632.511	649.01	740.906	727.758	674.644	719.59	639.726	803.433	633.657	661.072	621.693	745.052	666.445	695.807	799.423	665.563	623.647	600.648
band225	698.63	703.082	794.857	592.343	732.037	636.532	744.57	631.796	628.815	697.745	633.31	637.485	637.146	656.877	749.214	731.493	678.985	724.73	649.036	812.581	639.533	668.656	631.197	751.467	675.21	705.415	804.872	669.038	631.233	607.33
band226	706.04	708.982	799.755	597.713	740.971	645.706	750.253	638.002	638.371	702.403	638.656	641.509	643.014	657.725	754.206	741.505	692.876	732.476	653.167	819.603	645.604	677.718	635.229	759.568	680.682	710.401	811.645	676.107	640.59	612.049
band227	712.6	714.945	803.131	601.145	741.451	652.097	755.914	642.023	641.143	707.849	644.964	645.276	649.484	662.468	760.924	741.788	699.465	740.889	661.306	824.902	650.98	679.015	638.151	760.291	687.294	714.974	818.935	686.24	644.608	620.622
band228	713.14	722.658	810.346	613.488	751.097	658.157	761.737	648.959	647.493	712.769	650.235	651.508	652.102	666.713	767.081	753.637	709.12	740.611	663.071	832.091	657.344	691.789	648.223	769.475	692.783	722.95	822.905	691.86	651.222	621.737
band229	720.4	727.112	816.99	617.54	757.007	664.725	769.233	653.574	655.977	716.684	650.56	653.04	654.179	671.113	764.687	756.248	713.335	751.643	668.893	839.265	662.701	695.819	650.635	773.696	700.442	728.297	828.298	695.199	654.671	632.129
band230	718.993	732.118	819.041	618.954	761.321	663.064	770.768	651.882	657.052	718.961	656.273	656.793	658.214	673.842	768.689	760.046	716.64	756.913	670.683	840.269	660.997	699.555	651.202	778.85	701.176	730.376	829.241	695.852	659.7	632.406
band231	724.797	735.864	824.448	625.549	762.456	667.101	774.729	656.765	662.096	722.101	660.929	662.216	662.489	680.152	778.185	762.234	720.44	756.601	676.845	843.522	668.027	701.626	657.085	779.382	703.71	733.078	832.814	701.581	666.738	635.39
band232	725.41	737.694	825.61	626.167	766.069	671.646	778.842	657.633	667.034	724.188	662.15	661.528	661.404	682.062	778.836	764.226	726.931	761.743	677.567	848.102	669.198	705.737	659.996	781.706	708.092	735.132	835.444	704.488	666.795	640.074
band233	728.137	737.7	828.6	633.173	768.152	672.631	782.549	659.244	670.037	726.531	663.927	663.024	658.129	683.786	780.491	765.074	726.949	763.13	676.933	848.61	669.421	710.865	659.876	786.327	709.623	738.393	837.118	705.155	667.51	638.839
band234	728.81	737.773	830.797	639.043	769.603	675.393	780.848	662.288	670.794	728.364	663.645	662.965	663.874	686.676	777.736	771.084	727.669	764.646	682.27	851.31	670.704	711.591	661.117	784.157	713.417	738.048	839.53	708.735	671.249	645.011
band235	725.41	739.127	829.465	643.167	769.875	675.151	782.224	659.935	677.097	728.357	666.822	663.609	663.286	686.012	780.969	764.148	735.669	767.902	685.21	848.043	676.045	710.844	660.351	784.81	712.455	740.091	839.499	707.588	672.165	644.576
band236	723.667	743.379	829.985	642.886	770.67	678.72	783.136	662.434	678.63	730.251	663.494	664.321	660.538	690.22	782.661	764.717	735.971	769.78	681.048	850.711	675.708	712.883	661.518	786.312	715.855	741.005	838.773	712.59	673.299	645.956
band237	724.157	746.852	828.697	640.188	773.281	676.232	787.101	659.326	674.021	727.847	670.483	664.435	659.418	683.7	785.426	765.906	739.673	767.19	680.54	849.745	673.472	713.933	664.018	785.646	715.753	740.79	838.97	710.588	675.072	647.688
band238	720.607	740.448	827.479	646.031	768.608	677.992	786.662	663.16	678.207	729.545	668.724	664.161	660.335	689.604	782.507	767.038	739.855	770.402	683.508	850.352	675.067	714.089	663.97	785.901	715.877	741.266	839.539	710.85	674.155	643.544
band239	723.12	746.152	828.603	646.225	770.72	679.629	786.412	659.609	679.911	731.802	666.009	666.258	661.5	686.515	783.89	764.321	739.905	768.807	684.155	851.198	676.185	714.611	666.709	786.803	717.679	741.221	838.388	712.931	679.263	650.561
band240	723.82	743.812	826.392	647.497	774.283	680.472	789.787	660.005	679.622	729.95	668.834	666.825	662.239	683.836	784.744	767.08	741.149	773.135	686.782	851.756	676.828	719.147	664.254	784.69	716.258	742.281	837.508	711.648	677.509	648.602
band241	726.347	742.133	829.685	646.849	773.293	680.337	791.266	661.563	681.476	729.141	667.583	668.802	663.654	689.076	786.164	769.234	742.505	777.087	685.861	849.011	677.972	719.117	667.332	785.745	723.931	743.28	838.322	715.719	677.465	648.529
band242	724.743	748.921	827.939	649.096	772.9	680.787	789.034	660.818	686.253	731.733	672.638	665.845	661.78	692.314	784.561	767.631	748.764	772.942	685.115	852.827	677.714	717.572	666.163	784.336	718.908	742.204	836.72	711.475	679.999	648.534
band243	717.42	745.397	828.571	651.716	771.585	679.714	791.291	659.04	680.616	729.052	667.952	664.859	661.681	690.179	790.812	761.2	748.153	777.505	687.417	849.346	676.632	717.297	664.55	784.529	718.186	741.109	836.894	712.8	679.162	651.886
band244	718.263	741.521	828.598	654.352	773.098	681.766	788.862	658.105	678.781	729.605	665.795	665.616	658.714	685.686	786.042	765.224	745.167	775.172	684.246	850.909	675.109	719.476	666.823	782.854	718.648	740.644	834.247	712.78	679.249	645.552
band245	719.8	742.267	822.6	647.219	771.168	679.025	786.566	657.084	682.841	727.833	667.567	663.71	657.819	685.756	780.345	760.577	746.436	772.037	680.869	847.268	675.745	718.954	664.014	780.531	716.802	738.734	830.204	712.076	677.317	648.546
band246	711.907	744.003	821.719	651.679	764.588	676.507	782.58	654.363	679.752	722.434	663.207	661.583	650.346	683.554	778.556	758.992	745.309	767.601	681.504	844.152	672.666	712.967	659.943	774.331	713.337	734.415	826.085	707.532	673.119	646.353
band247	711.457	733.112	817.576	648.627	762.246	671.994	780.849	649.731	679.831	722.304	660.241	656.254	646.272	681.784	777.679	751.106	742.269	766.728	682.032	838.107	670.187	712.548	658.333	769.795	712.685	730.431	823.124	707.148	674.029	646.816
band248	711.95	729.509	808.898	646.667	757.215	668.905	778.191	649.024	675.169	716.856	655.346	653.794	643.69	679.386	770.251	746.948	739.833	764.098	672.107	836.034	666.988	708.596	653.835	765.962	709.48	728.607	816.839	703.353	670.541	638.388
band249	706.207	733.242	804.608	646.231	754.155	667.257	770.902	643.837	671.676	713.468	656.128	651.783	643.06	672.39	767.666	744.385	736.938	761.317	675.302	832.326	661.119	702.855	649.746	761.15	704.529	724.294	814.184	700.258	667.417	638.056
band250	700.683	726.036	798.562	645.747	752.566	669.087	768.126	643.725	674.705	711.889	652.059	647.579	639.508	673.877	764.689	744.94	729.185	757.841	670.722	827.964	663.049	700.577	647.14	756.15	702.027	720.427	810.354	696.341	665.75	634.462
band251	701.297	718.248	800.673	641.701	750.326	664.195	765.549	639.482	672.049	708.746	649.043	647.31	638.81	672.567	759.415	740.782	731.265	756.124	666	824.654	659.969	700.508	647.089	756.218	701.396	718.768	806.008	695.389	662.726	633.474
band252	689.483	722.282	798.959	641.929	749.785	664.191	764.84	637.603	667.822	706.494	647.793	644.202	635.86	665.791	758.721	739.972	725.655	752.717	666.639	824.987	658.467	698.625	647.782	752.12	698.436	717.623	805.197	694.85	661.832	633.02
band253	695.043	717.43	796.613	641.235	747.561	661.638	762.3	637.673	671.177	705.969	650.638	643.017	630.665	667.347	757.567	736.804	726.415	750.757	665.885	821.495	657.638	697.044	643.718	750.843	698.941	715.893	801.667	695.351	660.048	628.903
band254	692.283	720.888	794.576	643.42	743.94	663.35	759.77	635.556	666.28	703.977	641.772	641.431	630.151	665.105	754.514	735.511	726.244	749.979	660.111	820.713	658.393	700.121	642.479	750.104	695.058	713.705	798.747	689.603	659.709	628.924
band255	689.557	715.861	795.567	636.164	743.702	656.936	758.817	632.151	666.694	703.853	644.444	642.079	632.816	664.105	752.822	729.86	726.964	751.233	666.762	816.483	654.797	699.041	642.803	750.326	693.985	712.395	796.893	687.537	661.487	630.411
band256	684.957	714.324	788.927	636.623	740.734	653.516	756.837	628.937	666.073	698.604	645.018	640.296	628.481	662.546	749.272	732.521	727.109	747.521	655.008	812.533	650.571	692.778	636.638	748.316	693.238	709.935	793.913	685.006	656.859	626.007
band257	683.11	710.503	783.286	633.861	737.099	657.095	754.07	629.432	663.802	696.671	638.923	637.155	623.497	659.708	747.457	727.984	717.625	743.463	653.738	809.664	649.937	690.356	640.612	742.555	689.908	707.639	790.436	685.135	654.946	623.273
band258	680.18	709.036	781.668	635.398	733.962	650.072	747.579	624.684	659.582	694.487	638.715	633.969	621.459	659.376	742.648	726.489	715.087	738.532	655.048	806.447	646.63	687.574	633.606	737.065	686.284	702.139	784.95	682.163	654.987	622.852
band259	673.617	705.579	776.85	632.466	733.068	650.23	744.041	622.834	658.588	688.539	634.016	630.226	617.302	653.982	733.736	719.709	715.662	741.193	648.571	803.175	643.138	685.598	628.119	731.96	681.795	699.982	778.777	678.296	649.426	616.865
band260	672.003	694.376	773.891	630.309	726.483	647.538	738.852	618.44	653.553	686.073	631.137	626.727	619.709	651.62	733.467	718.056	703.698	732.844	648.23	798.204	641.196	678.745	624.695	728.727	679.877	695.228	773.442	674.554	646.981	614.159
band261	669.44	695.203	768.225	622.33	723.216	643.118	736.239	616.138	647.87	680.287	629.28	624.465	610.082	648.053	732.789	708.443	703.676	726.828	646.341	794.642	635.003	675.915	624.91	724.709	676.188	692.021	769.829	670.235	641.997	609.637
band262	661.3	692.47	763.4	624.552	718.537	639.965	730.122	611.302	646.773	677.43	626.027	620.107	607.305	644.992	720.595	706.659	703.956	723.86	643.96	788.019	634.205	673.106	619.511	720.527	672.708	687.678	766.675	666.578	639.286	607.493
band263	657.89	685.37	758.044	617.105	714.677	632.584	725.876	607.204	643.091	672.893	620.011	618.639	604.997	638.832	718.206	704.056	694.873	720.606	638.623	783.07	627.795	671.299	614.915	716.132	667.292	683.35	758.355	662.134	631.771	602.417
band264	656.173	679.536	753.354	614.731	707.13	629.006	723.424	604.18	640.47	669.401	617.46	613.354	599.783	633.698	715.822	696.226	690.673	709.939	633	777.458	624.403	665.262	609.887	709.103	663.78	680.143	753.216	657.156	634.666	599.111
band265	653.72	680.755	747.569	610.123	703.841	624.464	718.437	597.659	637.07	666.131	613.189	608.615	595.198	633.593	707.462	692.383	693.669	711.077	626.976	773.482	622.079	660.36	608.252	705.282	659.653	673.643	752.784	653.82	628.633	597.753
band266	647.583	678.312	750.09	609.071	702.719	622.563	713.553	597.864	634.081	664.711	612.207	610.011	592.549	630.298	705.757	691.737	686.996	710.59	626.706	770.061	618.64	657.482	605.296	702.252	656.295	672.505	746.815	651.262	627.64	595.076
band267	650.627	674.579	743.724	610.58	697.838	622.244	711.302	597.744	634.788	662.151	607.125	606.203	589.967	627.201	701.661	688.367	685.356	703.497	622.52	767.848	618.305	655.996	603.259	697.806	652.579	668.342	745.011	649.64	625.705	592.671
band268	644.743	672.036	738.443	606.414	698	621.242	709.743	593.21	628.418	657.291	607.774	602.571	584.418	620.374	699.034	685.317	683.182	700.286	619.579	763.809	614.258	654.266	601.459	695.777	652.9	667.265	741.111	646.094	619.468	589.472
band269	640.75	672.373	736.763	605.679	693.274	618.186	705.005	591.576	631.932	658.057	608.282	601.805	584.47	622.581	698.556	681.381	678.825	702.243	620.147	759.126	614.723	648.874	602.321	692.057	648.191	664.692	737.957	643.169	619.715	589.438
band270	636.7	666.615	730.383	599.309	686.11	615.159	702.633	587.485	624.99	652.205	600.216	598.386	584.571	616.649	692.144	677.329	675.585	695.492	613.817	756.122	609.117	650.477	600.285	689.325	645.049	660.601	734.205	642.57	614.951	586.023
band271	630.987	657.379	727.005	596.336	685.836	611.288	695.901	582.839	621.407	648.252	602.421	596.562	575.813	616.228	686.078	675.417	669.32	690.381	615.163	750.427	605.702	646.843	594.216	686.797	640.371	656.748	729.461	637.072	610.627	581.077
band272	629.137	656.482	723.719	592.664	683.274	606.507	692.543	579.247	616.214	641.802	593.446	591.281	576.665	608.926	687.269	673.85	666.196	685.701	602.151	745.971	601.524	637.585	587.743	682.178	635.597	652.052	722.518	633.416	607.044	575.554
band273	624.167	649.997	715.613	587.87	673.366	604.789	688.781	574.056	611.196	639.133	590.672	585.511	567.091	605.926	679.661	664.026	661.902	682.069	602.405	739.491	597.163	634.506	580.676	674.197	632.838	646.907	718.339	627.427	603.169	573.485
band274	618.623	646.782	710.857	582.654	670.465	597.648	681.267	567.586	603.715	630.866	585.476	578.881	564.659	596.427	679.104	658.02	658.996	676.556	592.75	734.947	588.247	629.819	577.112	669.231	622.898	641.313	711.532	623.686	598.253	569.53
band275	612.01	641.348	702.499	576.164	664.692	594.574	675.71	564.77	600.979	626.333	582.435	575.099	554.36	597.016	666.817	651.87	646.916	669.431	592.274	726.546	587.891	624.648	573.158	665.923	622.254	636.485	703.735	617.671	594.541	564.64
band276	608.393	638.082	697.308	575.67	658.788	586.075	671.022	560.197	596.771	620.865	573.904	572.107	558.374	585.187	665.76	647.699	642.978	664.701	584.746	719.792	582.303	619.353	571.183	658.102	616.993	630.955	697.828	613.721	589.428	559.319
band277	601.99	630.167	693.821	570.75	653.053	583.373	665.784	555.195	593.455	616.074	572.025	565.09	545.973	584.164	661.008	643.036	639.567	659.354	583.877	713.465	579.103	614.629	566.087	653.436	611.715	626.445	694.451	607.978	586.993	557.044
band278	597.28	628.297	688.121	568.133	649.731	578.853	661.784	549.408	589.882	612.614	567.355	561.384	543.115	581.411	659.146	636.671	637.324	658.22	578.083	709.573	574.509	613.175	564.326	646.398	609.495	620.627	688.187	602.767	580.967	553.651
band279	597.92	623.179	681.322	562.593	643.845	576.373	657.19	549.855	586.559	607.692	559.428	556.51	540.354	574.14	657.859	631.587	630.302	654.029	575.651	705.826	571.974	604.488	559.894	643.097	605.866	618.157	684.188	600.528	577.396	548.903
band280	591.34	618.894	678.475	561.015	641.917	575.101	653.48	544.31	584.361	603.535	558.831	555.386	540.967	568.318	647.462	628.024	626.676	649.214	571.865	699.088	569.304	603.057	554.539	637.194	599.51	612.947	680.681	599.062	571.704	543.042
band281	583.473	617.873	675.722	559.127	638.02	568.455	651.314	542.51	579.076	601.625	556.273	550.419	535.102	571.789	644.548	626.403	627.28	645.265	566.464	695.032	565.096	599.173	550.317	635.874	600.117	610.277	678.082	593.076	570.314	541.793
band282	586.847	614.406	670.104	551.975	634.1	564.209	647.414	539.118	577.019	598.791	550.982	544.875	532.047	569.63	647.574	620.627	626.247	642.561	562.754	693.509	560.411	594.768	547.353	630.876	594.26	608.062	673.288	589.987	566.987	538.912
band283	577.6	609.2	668.53	553.583	630.539	564.824	645.819	535.58	573.618	595.268	551.251	546.802	530.538	566.099	643.073	619.148	616.709	640.902	564.75	687.853	559.49	594.258	547.106	629.207	593.162	604.436	668.778	586.884	565.795	534.179
band284	578.367	609.091	663.029	544.728	626.113	560.106	639.613	529.501	567.686	590.375	547.323	543.143	527.607	561.585	634.196	611.16	615.018	636.73	558.278	681.564	552.485	587.128	541.773	622.252	586.984	600.266	663.845	580.869	558.323	532.174
band285	575.213	602.991	661.184	543.451	622.65	556.986	635.237	528.003	566.276	584.921	541.321	538.029	525.363	556.084	630.796	611.206	611.189	634.196	551.742	677.388	553.055	583.731	537.771	620.762	583.613	596.42	659.595	579.544	557.305	526.806
band286	566.57	592.127	651	539.188	617.176	553.381	629.467	522.348	561.015	581.236	539.884	536.362	522.173	552.302	623.279	606.627	602.44	625.325	548.802	672.185	546.972	576.996	530.697	612.773	577.14	590.393	653.335	574.202	552.405	523.387
band287	565.223	587.724	646.872	534.673	612.426	547.033	623.293	517.438	554.079	574.018	536.722	533.958	523.47	546.24	620.426	599.675	601.727	619.331	547.29	664.91	539.891	571.452	528.97	611.467	571.956	585.171	648.567	566.95	548.406	520.12
band288	556.377	586.455	637.646	533.269	605.493	542.242	618.607	511.72	551.245	568.482	536.825	534.22	522.61	537.456	608.452	593.75	595.978	616.19	537.869	660.381	536.553	571.169	524.697	602.607	568.194	580.202	640.353	564.346	539.57	514.081
band289	551.85	578.758	631.983	527.568	600.393	535.259	611.811	507.454	545.029	566.736	534.695	534.375	525.569	536.846	606.392	584.717	590.265	608.354	537.044	653.282	529.457	563.035	523.424	596.276	561.716	575.205	633.731	556.619	535.865	512.995
band290	546.867	576.006	625.063	520.531	592.216	529.611	607.902	503.258	540.47	562.174	536.289	534.092	523.624	531.721	602.95	580.541	584.142	604.619	538.472	645.089	527.427	558.141	522.145	589.874	555.019	568.046	629.216	552.544	534.12	508.645
band291	542.363	572.115	621.666	519.281	585.399	525.383	602.549	499.02	540.592	563.769	540.216	534.73	524.882	529.008	594.253	576.958	576.527	596.881	537.663	639.723	523.221	550.831	526.433	582.59	549.634	561.882	623.872	550.453	534.976	510.365
band292	538.17	564.876	614.981	515.898	585.646	526.602	597.311	497.322	536.981	560.262	543.462	537.419	526.791	530.353	591.927	574.279	575.025	594.352	540.155	633.982	520.034	548.742	521.879	582.099	548.7	559.752	619.251	544.027	533.17	511.006
band293	532.2	559.427	610.63	516.238	581.146	523.841	592.974	494.792	535.888	560.419	540.927	538.77	531.681	528.39	589.601	568.2	567.345	586.815	538.262	630.951	520.036	546.692	525.284	577.17	546.188	556.38	610.958	542.388	533.006	512.283
band294	528.717	559.436	606.228	518.58	575.202	522.176	588.369	494.829	534.225	561.87	544.018	538.726	529.868	530.752	586.332	564.735	568.549	588.153	543.266	628.405	518.825	543.731	526.793	571.572	540.761	552.964	609.213	539.774	534.601	514.604
band295	532.86	558.409	608.07	515.806	574.612	524.13	584.855	495.475	537.815	562.813	548.631	540.98	528.209	533.897	581.527	563.916	562.204	587.243	545.202	626.908	519.493	541.536	525.032	570.457	543.634	552.645	607.111	541.518	533.684	512.932
band296	533.97	559.988	606.373	519.327	575.033	524.507	585.241	497.109	537.263	564.097	549.374	542.615	531.794	532.308	585.906	561.934	564.378	585.823	544.643	628.075	523.59	542.881	527.725	572.584	540.225	551.675	607.677	541.79	536.686	517.636
band297	533.833	556.524	602.746	521.944	573.631	524.238	584.793	497.365	539.906	564.214	546.592	542.242	531.596	536.064	582.381	564.611	561.116	584.847	546.683	627.969	521.787	541.705	529.484	573.032	541.414	551.722	605.853	542.446	539.516	515.1
band298	534.41	557.776	607.564	521.855	576.699	525.681	585.96	496.046	539.434	565.93	547.36	543.708	536.692	536.444	591.29	565.8	565.029	586.701	546.73	629.026	523.637	544.392	528.199	574.423	543.972	554.411	607.343	544.256	539.468	519.681
band299	533.55	553.824	606.811	520.515	578.615	530.52	586.792	498.769	545.532	566.522	546.645	545.418	535.489	533.721	586.003	563.1	564.815	586.228	542.964	630.551	527.377	545.157	531.956	573.225	542.344	554.486	607.283	546.016	540.745	518.442
band300	533.113	557.158	611.944	521.043	580.993	529.398	586.753	498.215	545.146	567.025	546.089	546.914	535.665	540.622	587.183	567.866	565.458	583.198	548.139	631.551	524.802	545.499	531.402	574.284	544.874	557.132	610.354	547.154	541.767	519.364
band301	534.6	564.891	605.942	523.997	577.398	534.507	588.142	501.69	548.687	571.277	549.528	543.808	538.552	539.076	587.313	566.966	568.135	591.487	549.282	631.385	530.252	545.606	532.809	573.609	545.617	555.187	610.359	549.583	543.33	521.902
band302	535.607	564.142	606.596	525.241	582.433	530.24	589.529	500.607	548.53	569.957	555.319	550.499	541.467	540.324	588.42	572.054	565.171	589.132	548.357	630.628	529.795	548.805	531.457	575.472	548.007	556.17	609.995	547.739	546.089	523.025
band303	537.723	560.303	613.046	525.068	581.149	533.064	591.042	502.852	544.658	571.289	550.923	548.184	539.448	539.969	590.295	567.16	570.844	589.389	549.806	634.795	530.677	547.677	534.402	576.699	546.486	558.925	608.891	552.334	544.529	523.736
band304	540.21	565.442	609.673	530.759	580.321	530.391	590.266	503.523	547.428	573.165	557.289	550.827	540.915	540.487	596.634	573.465	574.276	590.63	555.512	635.276	530.425	552.603	536.229	577.876	552.399	559.325	609.851	550.741	547.024	524.607
band305	539.987	560.952	615.736	528.228	585.701	537.487	591.715	504.782	550.883	571.287	556.018	548.964	540.475	541.257	593.898	575.303	571.2	590.778	550.667	636.417	532.832	554.726	534.356	578.355	556.725	561.316	611.363	553.528	545.482	523.997
band306	540.763	569.236	613.002	528.645	581.436	536.685	594.165	504.032	550.687	574.01	557.059	553.415	535.734	539.688	598.713	573.048	570.6	596.807	556.222	637.701	534.392	552.599	538.686	579.843	550.888	562.791	613.823	553.46	548.944	527.542
band307	538.453	568.221	618.571	534.315	583.353	537.157	594.068	504.743	553.3	574.891	553.989	552.195	539.258	541.468	599.42	576.188	575.531	600.032	553.869	639.11	534.78	554.202	537.555	581.058	552.321	562.893	615.971	556.633	548.816	523.054
band308	544.223	567.197	618.969	535.114	586.099	540.329	597.183	507.741	552.002	574.877	556.508	550.555	542.585	545.92	594.499	576.495	576.113	598.603	556.948	641.144	536.795	555.543	537.697	580.205	555.747	563.762	615.985	557.203	551.723	525.919
band309	543.813	571.303	614.276	534.802	587.711	541.88	597.549	506.607	554.994	578.293	555.487	553.801	541.396	547.051	603.958	576.607	576.076	596.672	556.103	638.907	539.889	555.035	542.119	582.308	555.891	564.096	618.258	558.61	552.846	531.531
band310	545.973	565.745	619.228	534.13	591.819	540.132	597.717	508.169	555.457	577.361	558.519	551.996	540.687	548.041	602.358	580.309	573.905	600.238	558.25	642.35	537.66	557.532	541.879	583.681	558.731	565.589	615.448	557.936	553.186	531.263
band311	549.84	569.482	616.259	532.349	588.34	539.34	596.335	506.844	554.167	576.154	557.761	548.791	542.618	543.756	599.428	575.309	580.127	602.902	560.083	641.08	534.937	557.494	543.284	582.455	553.476	565.613	615.114	557.656	553.863	530.468
band312	542.903	572.982	616.087	533.207	591.478	543.632	598.177	507.371	559.345	577.999	565.451	555.098	547.681	548.07	603.956	575.798	583.015	595.979	557.964	640.858	537.947	558.295	539.147	583.4	558.346	567.257	618.037	556.437	550.524	527.587
band313	545.737	571.809	622.939	533.438	591.001	537.88	599.535	508.119	553.259	577.669	558.535	554.083	546.151	544.858	605.227	576.331	579.338	602.563	559.437	642.045	538.089	559.899	541.644	580.089	556.142	566.551	619.001	556.445	553.961	529.949
band314	539.58	568.833	618.588	541.173	592.939	540.836	598.243	507.916	557.974	580.407	559.952	555.863	548.245	548.115	600.603	574.898	580.509	600.984	558.659	640.532	540.321	557.153	544.998	583.421	554.239	565.765	618.349	559.267	557.438	531.092
band315	545.397	572.082	616.678	542.386	590.865	544.482	599.023	507.532	559.639	581.057	563.916	557.256	548.03	549.216	607.781	580.341	580.385	601.143	562.171	645.015	539.791	561.083	541.826	581.309	558.929	564.898	620.254	561.617	557.026	529.926
band316	543.49	569.676	622.005	545.086	592.076	543.698	601.339	507.157	559.677	581.664	560.487	555.552	545.923	549.337	604.512	578.749	583.084	601.974	557.524	639.864	541.735	558.342	545.672	585.442	556.253	566.67	619.149	562.59	557.176	532.36
band317	545.193	573.418	621.557	541.938	592.484	543.917	600.155	511.369	560.1	583.292	563.788	559.907	545.03	551.263	601	580.405	586.673	603.852	563.337	643.358	541.506	560.322	544.894	584.114	557.417	569.794	621.09	562.507	561.024	535.414
band318	545.593	568.573	613.738	547.664	592.893	543.203	598.182	510.684	561.17	584.403	560.31	558.882	547.953	548.201	602.812	581.397	583.109	598.222	558.405	644.017	540.591	560.825	549.417	582.977	557.668	568.7	621.02	562.379	561.099	534.472
band319	547.963	574.403	622.15	542.157	593.887	546.623	602.88	509.56	561.493	583.83	568.262	559.053	544.044	551.324	606.047	581.132	587.313	606.405	559.774	645.622	542.902	563.956	544.424	582.768	560.817	568.013	623.066	561.6	562.122	534.633
band320	546.047	578.015	618.939	546.731	594.122	547.224	602.294	511.205	562.593	584.179	565.877	560.697	548.302	553.31	608.731	582.932	587.484	608.28	564.139	645.6	546.045	565.584	544.108	584.549	561.338	570.192	620.782	564.58	559.056	535.72
band321	545.083	574.024	621.08	548.651	594.759	546.431	603.985	511.219	563.571	585.492	568.052	562.631	550.948	551.232	606.53	587.675	591.327	605.444	569.345	650.466	545.744	566.158	548.668	584.832	561.357	571.863	622.134	563.195	563.535	535.53
band322	548.69	573.391	621.412	541.377	599.733	549.42	604.942	514.023	566.95	585.764	569.257	560.317	545.997	550.068	608.159	581.639	586.633	611.265	568.052	647.592	545.379	565.327	551	590.417	561.631	571.344	623.694	569.341	563.778	538.791
band323	550.38	578.888	620.002	549.935	593.987	550.418	607.947	513.759	569.968	586.747	564.806	560.778	550.11	554.07	607.073	585.673	591.044	603.757	568.881	649.282	549.776	568.724	550.934	587.193	564.617	568.764	622.817	565.299	566.623	540.41
band324	549.253	573.491	626.729	552.735	600.03	548.857	605.135	515.991	567.891	588.014	568.738	560.409	548.099	553.546	615.313	581.533	587.047	606.447	568.73	650.934	545.729	566.799	553.316	590.778	562.623	573.467	623.357	567.568	566.062	539.902
band325	549.46	577.024	622.818	544.722	599.04	553.174	608.495	513.377	567.825	587.367	571.38	563.293	547.003	553.031	609.637	587.76	585.804	606.217	578.877	650.383	545.704	571.401	551.05	588.932	565.877	572.397	624.332	569.227	564.181	539.461
band326	551.883	578.276	627.644	546.991	599.281	552.625	609.852	515.453	572.577	589.519	569.995	566.501	549.783	554.686	610.399	589.136	598.764	610.968	568.718	652.922	548.504	569.697	552.098	591.975	566.287	577.048	625.793	571.81	567.173	544.834
band327	553.537	571.327	627.249	550.096	600.648	552.507	610.002	516.789	569.097	588.163	572.802	567.855	553.165	556.641	618.71	587.942	597.342	613.847	569.369	653.164	550.032	569.647	557.679	591.422	564.712	572.569	627.234	570.785	570.241	544.606
band328	548.113	577.924	621.499	554.549	601.439	556.35	611.011	516.186	570.169	592.357	574.663	567.459	546.629	555.236	615.658	587.711	594.051	612.503	575.052	653.386	551.8	572.72	555.496	589.871	565.953	575.846	626.825	572.814	569.384	540.85
band329	551.933	585.364	628.663	555.312	602.484	553.043	614.895	517.912	572.298	590.416	573.852	568.201	548.06	558	616.326	587.2	595.811	613.283	571.726	652.246	552.077	569.638	556.105	595.224	567.876	576.367	630.569	573.984	569.188	545.438
band330	548.757	583.497	629.799	552.231	603.178	555.903	611.099	516.536	572.989	590.513	578.804	568.344	554.332	556.127	610.279	585.806	596.178	608.958	571.008	652.047	549.991	568.768	557.193	591.158	566.4	576.258	630.149	570.27	575.312	542.907
band331	553.873	589.097	627.886	559.682	608.811	553.081	611.499	517.865	572.245	593.913	570.581	565.972	553.442	562.304	615.734	591.934	609.469	617.098	572.496	653.692	556.519	576.235	553.082	596.803	570.207	579.755	631.04	572.64	574.062	545.057
band332	558.753	583.494	633.821	552.515	604.947	555.789	613.599	517.859	570.075	591.222	576.394	566.132	554.544	561.203	618.068	593.042	593.207	616.627	576.159	660.38	552.758	575.337	556.248	595.571	571.396	580.758	630.64	573.505	572.321	547.132
band333	548.43	586.876	632.54	559.395	607.535	559.679	616.931	518.979	580.193	590.996	575.048	568.997	552.887	561.197	615.227	591.681	598.989	619.852	575.552	660.083	556.114	575.24	559.333	598.703	568.647	578.167	631.581	579.276	574.289	548.517
band334	553.223	592.858	638.104	559.244	608.795	553.654	615.561	520.122	574.037	593.093	578.902	568.133	557	562.199	622.465	587.565	607.571	618.709	577.401	655.468	554.529	574.183	559.323	596.442	568.471	580.323	635.963	574.212	574.349	551.692
band335	554.883	588.318	638.266	561.528	608.968	559.029	618.753	523.151	577.23	592.214	580.658	570.108	554.313	562.144	619.736	594.064	604.807	627.193	574.782	659.167	555.902	575.98	558.835	600.142	572.679	582.576	638.457	580.765	578.904	547.039
band336	552.483	587.724	632.136	563.907	610.268	556.319	614.678	522.909	576.877	595.348	579.934	569.311	561	562.493	618.41	597.76	605.676	622.111	578.48	659.144	559.807	577.573	559.459	594.012	573.462	582.567	637.369	576.912	576.012	549.216
band337	554.31	592.033	635.772	558.929	610.804	564.168	619.983	522.232	580.961	598.318	584.809	564.755	553.973	564.741	616.36	599.194	602.796	623.757	584.317	660.197	560.219	579.158	563.612	602.375	574.739	585.184	635.439	577.119	580.708	556.132
band338	557.77	593.112	638.62	558.901	610.77	565.29	617.576	522.473	575.621	598.01	578.601	569.295	557.137	563.561	618.42	600.531	606.825	625.553	582.623	660.608	560.935	585.09	561.819	596.731	577.585	585.599	635.944	580.734	576.071	553.747
band339	559.473	594.185	635.387	560.617	618.184	569.553	619.252	525.383	581.241	598.362	585.847	575.625	564.621	564.862	625.141	599.273	604.433	627.963	585.877	662.523	562.06	585.12	566.17	601.787	581.589	587.282	636.749	582.432	579.696	551.909
band340	563.767	595.112	639.23	567.741	611.628	559.188	623.632	523.112	583.9	600.998	579.973	573.735	556.549	563.957	617.295	598.301	608.08	625.106	584.409	661.669	562.998	577.885	560.447	596.52	572.316	584.806	641.221	580.21	583.445	553.455
band341	563.057	600.494	639.76	570.302	617.186	565.691	622.882	527.379	583.836	598.625	580.134	573.505	555.478	567.345	621.444	601.128	613.553	623.251	575.627	663.277	562.421	586.203	563.645	604.609	580.586	589.326	643.822	581.619	582.888	552.076
band342	562.577	589.688	642.484	562.463	616.244	567.884	624.593	525.515	580.53	600.778	583.244	576.567	564.181	565.704	627.243	597.615	604.309	629.278	583.333	667.048	563.197	583.662	570.273	600.207	580.495	586.712	638.523	583.437	583.088	559.735
band343	565.34	590.579	641.373	569.182	612.554	558.99	621.323	524.617	580.042	604.203	584.954	574.838	563.451	572.148	625.073	601.158	612.96	623.698	586.218	667.208	563.286	584.664	567.924	603.405	583.34	589.243	637.006	584.203	582.226	557.527
band344	566.033	589.47	640.14	572.515	616.68	564.309	621.184	526.834	589.225	600.438	579.157	574.791	564.654	570.969	628.204	598.729	607.88	627.794	582.337	667.338	562.998	585.344	562.55	604.661	580.606	588.333	638.984	587.05	584.399	553.795
band345	560.023	590.018	647.828	568.605	621.175	565.429	624.482	527.721	590.387	604.157	587.294	575.264	563.299	574.706	630.248	605.675	603.465	630.942	584.956	665.08	563.111	591.583	569.039	603.708	589.013	589.374	643.084	584.626	590.785	560.946
band346	566.823	599.93	640.923	573.568	621.591	570.157	625.889	532.058	591.049	606.068	590.918	575.929	560.363	573.016	628.013	605.222	613.913	632.003	590.032	669.141	567.512	586.106	570.55	611.173	588.291	593.805	640.547	589.617	590.275	562.024
band347	551.823	592.091	638.995	573.164	616.99	571.01	625.874	527.334	583.724	601.7	585.148	579.304	570.03	574.762	629.919	607.489	615.985	630.683	588.94	668.666	565.49	590.521	561.176	604.852	580.718	590.113	641.534	592.017	586.451	556.556
band348	563.89	599.709	652.889	570.389	623.541	573.561	631.004	534.708	592.541	608.795	584.39	578.712	566.618	567.224	624.094	603.946	614.233	631.077	597.754	671.702	567.755	595.186	567.984	610.145	589.818	596.687	647.604	592.683	583.135	564.524
band349	562.05	606.755	645.036	585.441	623.276	572.934	625.823	529.017	591.532	607.264	584.246	582.907	558.387	571.359	635.018	601.95	615.767	643.204	596.952	672.093	569.301	590.265	571.229	601.508	585.576	593.536	645.867	587.106	592.381	558.14
band350	571.223	608.585	644.651	583.676	626.028	574.327	630.116	531.653	601.59	608.961	593.31	581.817	569.302	578.602	635.697	608.377	623.549	633.59	594.02	669.989	573.274	593.422	576.966	606.412	586.077	595.056	648.49	592.888	589.522	564.561
band351	566.257	607.918	642.666	584.117	623.935	574.849	633.659	530.598	594.953	607.205	589.565	585.763	567.607	576.78	634.36	604.754	624.64	635.132	590.417	670.651	571.552	596.621	577.03	614.277	587.588	595.604	653.408	593.901	588.663	565.67
band352	569.343	602.388	647.845	585.179	625.534	572.193	633.423	535.946	596.812	607.709	586.449	580.675	562.786	576.62	633.76	606.204	625.349	638.974	588.869	672.06	570.149	595.887	577.454	609.58	592.773	596.099	649.031	594.607	593.634	566.897
band353	571.7	599.303	645.252	582.978	627.09	580.567	628.006	538.015	593.274	609.336	596.415	586.577	572.912	571.027	633.029	610.667	619.251	645.95	595.036	674.779	572.139	596.327	579.014	615.742	596.183	597.861	648.678	597.329	593.272	569.857
band354	570.06	609.261	636.278	574.722	623.769	577.499	633.768	534.792	596.376	614.483	595.936	592.696	573.973	577.01	636.629	607.697	626.716	638.259	590.972	675.409	571.905	593.952	581.254	610.369	593.425	598.23	649.901	594.994	596.454	568.898
band355	578.103	597.718	661.787	589.62	632.776	578.035	631.106	535.481	604.603	611.907	596.052	589.444	566.692	574.234	638.426	606.786	623.742	638.981	596.671	684.938	577.993	599.176	575.736	613.862	594.453	600.786	650.059	598.026	592.954	567.609
band356	568.987	604.309	643.959	597.367	624.604	589.544	635.642	538.345	606.154	615.684	594.827	590.737	577.522	583.665	634.452	616.082	631.862	639.603	584.726	679.085	584.691	599.907	585.339	614.132	599.957	601.555	648.127	600.376	601.421	571.411
band357	581.673	604.455	659.554	589.25	633.367	576.971	632.683	536.717	594.556	614.685	589.697	586.103	573.464	575.055	642.41	613.23	624.756	643.492	598.179	675.362	572.362	602.151	582.395	608.172	600.127	600.653	655.441	595.59	602.845	573.128
band358	578.277	619.921	650.939	588.744	631.147	587.917	629.944	536.72	596.141	611.095	601.772	585.106	564.997	581.037	641.517	607.307	626.651	640.249	599.103	672.056	578.592	600.794	579.443	611.037	595.985	601.49	656.099	605.841	597.384	568.172
band359	572.343	610.991	649.215	585.722	633.673	588.426	635.603	539.849	600.799	614.893	609.893	590.747	578.511	579.988	648.384	614.605	624.742	659.259	610.29	683.425	579.642	604.296	579.362	616.467	599.888	605.136	654.15	599.792	595.569	577.404
band360	568.823	613.936	660.559	589.349	634.867	583.673	636.775	536.43	603.217	617.535	600.03	588.241	577.049	590.419	637.491	616.166	642.189	642.331	606.571	682.314	579.586	602.583	587.305	609.659	599.925	599.15	653.193	595.421	602.256	573.533
band361	575.27	606.327	660.758	593.309	634.511	589.799	636.361	541.818	606.763	617.067	599.239	588.361	565.063	584.973	634.269	619.451	631.098	637.688	598.984	679.402	586.701	604.465	577.218	614.524	600.496	603.775	654.399	606.132	602.393	570.078
band362	578.207	616.839	652.596	588.309	634.542	581.849	638.124	543.836	597.726	612.952	597.446	591.379	576.632	579.331	651.35	621.75	634.531	644.048	598.571	686.442	573.795	604.194	579.848	619.034	605.542	605.633	655.012	606.576	599.394	571.583
band363	569.64	606.994	651.119	598.651	634.207	585.791	640.682	544.08	610.047	622.588	608.235	596.732	572.602	592.795	639.708	611.615	646.335	643.828	617.206	678.464	583.22	604.139	595.3	616.632	599.109	602.249	656.626	599.747	611.25	586.24
band364	587.29	608.852	658.148	591.552	635.142	582.859	637.555	542.249	603.857	617.791	607.112	592.139	576.835	581.01	642.684	618.319	624.884	646.534	597.583	684.001	579.401	609.735	582.344	619.118	609.501	609.797	657.334	603.343	604.875	574.361
band365	585.5	618.797	667.036	599.895	649.191	596.696	638.661	546.613	617.323	621.427	605.49	591.502	566.214	582.29	654.167	614.653	631.873	649.36	597.587	681.609	587.36	606.349	587.876	623.286	601.464	606.576	659.696	603.21	608.874	581.626
band366	582.927	622.7	653.879	590.793	641.996	586.346	642.67	541.312	611.501	625.992	602.765	595.914	580.19	591.074	646.655	628.78	645.596	650.741	616.81	684.583	579.303	614.434	596.282	623.114	608.672	608.549	660.705	602.748	611.858	585.239
band367	584.087	603.918	663.484	592.741	639.315	595.762	641.111	540.378	613.311	622.307	610.346	602	587.277	594.099	643.726	622.373	634.356	645.582	602.393	684.392	581.954	606.102	594.413	621.701	608.099	608.564	659.944	608.554	612.238	582.841
band368	582.74	613.658	666.002	598.685	646.969	595.803	642.637	545.72	615.686	625.583	611.205	601.116	578.393	595.719	642.514	626.447	643.502	652.59	609.603	687.913	591.536	610.312	586.316	628.668	614.461	612.866	658.055	606.409	612.231	578.582
band369	585.147	621.142	656.172	596.059	637.727	597.532	643.507	546.369	613.066	627.809	613.97	603.07	575.978	589.002	647.449	619.818	642.178	653.455	610.726	688.557	585.549	608.566	584.911	621.402	606.443	607.557	662.787	616.379	613.536	584.851
band370	577.513	630.297	649.663	595.065	638.565	594.72	645.027	546.518	620.817	631.235	613.237	601.439	581.956	594.772	649.044	620.922	635.255	655.87	614.298	686.526	591.182	617.046	594.832	611	613.609	610.5	665.403	608.762	613.701	586.546
band371	582.243	613.448	656.242	605.556	639.555	602.066	645.815	550.554	627.301	627.301	603.071	599.872	584.951	596.329	645.836	624.116	631.225	662.595	598.96	684.145	593.459	604.443	592.924	614.421	603.536	607.611	665.191	613.138	614.676	586.931
band372	588.563	615.87	667.467	613.543	645.495	596.6	647.18	552.56	614.88	630.864	613.437	601.917	577.484	601.064	650.705	624.95	648.727	654.407	605.937	691.726	592.329	616.637	590.559	620.588	612.05	614.016	662.266	606.486	616.462	590.692
band373	592.69	613.506	650.169	613.164	646.574	602.275	645.628	552.926	621.381	629.808	609.282	602.698	587.239	589.805	665.875	627.23	648.767	660.992	612.369	693.322	597.309	610.302	597.686	623.117	613.405	614.829	662.563	618.753	621.85	591.928
band374	573.89	625.988	655.99	603.765	645.405	593.294	651.341	547.434	615.164	627.926	618.818	602.142	578.255	586.38	651.569	629.379	639.571	661.217	616.829	692.288	587.36	614.271	597.589	619.527	609.728	612.634	662.86	615.811	615.618	595.675
band375	579.687	630.409	653.591	611.287	641.751	601.161	649.703	553.224	624.587	628.215	611.403	601.851	573.777	593.901	655.507	623.625	650.564	663.619	616.794	694.448	598.456	614.138	589.578	627.161	610.256	610.477	664.837	615.139	613.571	586.004
band376	588.25	629.945	670.225	605.784	654.364	598.629	651.864	551.944	616.438	628.502	625.433	601.256	584.624	597.265	645.627	631.074	655.64	666.897	620.679	698.251	595.489	624.064	606.424	628.906	619.767	618.964	664.461	620.25	617.126	597.813
band377	588.757	612.285	658.453	613.84	643.069	605.47	646.297	559.449	632.019	632.007	612.827	607.552	579.599	598.825	651.352	620.305	642.244	662.04	609.722	697.443	597.196	617.786	599.092	615.201	621.406	615.589	668.316	627.291	626.323	591.288
band378	584.807	614.094	662.535	609.809	645.022	599.443	643.128	547.363	627.878	628.245	611.815	597.806	578.907	594.446	661.875	620.036	648.273	665.362	599.615	690.895	594.681	620.834	586.764	622.68	611.363	615.236	668.461	621.304	616.784	585.546
band379	585.967	623.112	656.366	615.012	646.871	600.126	642.947	550.93	624.715	627.948	616.581	590.837	571.143	597.776	657.888	623.675	643.171	666.492	613.647	690.035	598.322	622.694	590.934	614.326	617.194	610.802	661.873	612.339	627.851	589.142
band380	570.733	623.706	661.378	603.806	646.446	599.791	649.347	543.925	620.408	630.13	595.26	601.342	573.052	584.074	646.141	627.982	653.72	660.492	604.405	689.537	585.546	620.967	588.86	618.68	614.547	610.616	660.778	619.993	614.065	591.138
band381	581.447	611.324	660.574	600.151	636.862	602.012	646.147	545.082	626.429	627.181	611.077	588.424	573.599	605.318	647.937	625.784	656.738	660.127	607.929	687.688	595.84	608.559	592.465	613.486	609.217	606.306	665.138	610.925	617.915	587.42
band382	567.43	627.858	654.86	624.241	642.831	602.014	643.194	549.831	620.851	625.032	605.672	597.982	578.022	607.398	647.621	618.695	648.833	656.923	623.21	689.458	587.767	620.483	594.674	617.068	610.734	607.907	662	610.619	620.761	589.319
band383	576.737	623.382	669.194	620.963	639.753	593.104	640.484	550.172	634.173	631.139	595.519	591.259	564.975	602.413	635.41	627.174	654.975	665.902	619.889	687.415	593.621	621.386	596.456	619.595	606.032	606.398	659.948	616.095	626.925	590.711
band384	574.863	600.161	653.864	613.312	646.136	596.658	641.416	548.205	623.728	627.901	611.674	594.763	572.225	594.047	646.026	615.08	648.069	655.444	609.222	689.758	589.591	620.145	593.115	611.779	604.566	603.568	656.363	614.46	616.592	591.582
band385	578.55	619.642	641.576	616.469	635.867	608.203	632.317	548.399	630.047	627.299	594.114	586.671	573.997	591.376	631.269	604.07	647.116	654.296	600.563	688.798	588.211	619.966	584.176	606.647	611.894	601.503	648.976	624.608	624.216	584.385
band386	563.37	608.445	640.354	611.435	643.801	595.056	631.943	548.741	620.874	623.042	591.592	592.336	574.107	593.883	644.53	610.709	645.102	659.143	624.048	685.286	591.117	618.561	593.991	603.624	607.253	601.203	651.312	617.385	624.446	589.194
band387	563.727	612.379	641.031	611.574	632.444	598.126	635.494	541.39	625.397	619.214	594.032	586.584	564.755	585.848	634.18	613.166	650.887	656.656	607.766	678.695	584.375	607.07	585.858	596.17	596.538	596.345	649.836	606.559	620.411	590.172
band388	568.16	607.639	644.985	599.716	630.744	594.925	630.692	539.763	616.285	623.462	592.663	580.764	566.151	582.901	626.12	607.128	646.065	648.238	608.552	671.605	586.808	605.928	581.644	603.934	604.88	590.823	647.488	613.739	621.848	586.633
band389	556.6	591.967	628.579	625.299	637.554	603.729	627.574	532.822	623.645	621.689	602.79	587.095	560.615	594.292	635.063	615.134	649.116	649.217	613.806	679.756	584.065	602.686	576.259	598.275	607.835	591.121	644.103	598.808	621.87	584.796
band390	548.097	591.367	627.692	632.355	626.468	596.899	630.113	538.066	625.911	620.569	596.285	585.613	563.442	585.181	619.807	598.719	639.745	656.939	607.361	672.735	585.353	607.569	581.56	588.179	594.024	587.895	636.012	605.937	620.54	586.47
band391	551.73	584.597	626.339	615.944	621.895	594.137	623.645	532.44	625.588	619.635	588.998	576.89	547.769	586.577	631.551	596.625	650.724	642.929	628.647	671.111	582.404	600.924	578.995	585.672	600.585	585.095	635.304	604.24	619.648	574.305
band392	543.653	601.752	613.554	621.062	618.291	584.94	621.007	533.019	612.796	609.305	582.036	573.526	553.484	584.869	638.661	597.878	653.109	655.664	605.829	673.147	575.989	607.095	576.631	573.59	599.74	582.801	631.606	603.853	611.304	571.993
band393	538.44	591.015	615.932	610.836	615.769	590.054	617.028	526.4	615.622	614.02	584.417	579.62	544.643	575.951	616.499	575.1	650.258	647.545	612.175	663.142	577.634	589.782	576.197	584.632	586.724	570.505	630.878	590.805	624.231	581.509
band394	536.997	574.039	611.068	616.772	614.019	582.81	616.271	523.595	608.58	607.777	585.408	567.155	537.332	567.205	616.708	586.946	656.542	649.204	593.738	659.644	572.007	596.621	567.697	578.489	587.644	575.024	620.008	598.021	617.779	576.89
band395	541.08	585.436	620.397	608.957	618.974	582.932	610.283	520.23	616.754	604.158	579.72	576.577	552.703	576.741	603.507	593.066	655.804	648.603	597.004	670.79	557.271	592.128	571.869	577.038	589.154	573.284	626.389	596.777	615.229	569.577
band396	537.97	572.573	605.557	619.886	615.215	577.836	607.348	515.554	614.887	596.176	572.433	564.796	537.516	560.836	598.65	591.136	645.709	638.624	594.163	659.173	568.32	607.341	556.975	581.166	586.089	569.955	612.254	594.738	605.5	577.764
band397	522.74	554.527	605.705	615.92	609.293	570.632	593.418	496.83	601.822	594.979	564.913	550.685	525.734	568.634	591.681	573.499	640.571	641.31	586.028	651.843	554.286	592.752	557.963	558.228	584.371	565.489	607.982	581.727	611.207	567.416
band398	506.283	554.839	598.315	604.102	594.052	561.706	593.975	501.181	602.021	589.995	550.084	550.531	521.857	544.076	595.755	570.703	637.225	618.751	586.544	641.264	547.06	585.278	567.892	557.65	577.375	559.211	606.354	576.556	612.836	567.868
band399	491.223	558.688	592.099	613.731	589.536	561.464	575.259	485.85	610.665	580.59	568.882	560.727	509.104	555.023	599.063	548.655	620.204	610.423	598.623	644.175	544.496	582.068	538.002	542.723	567.409	544.694	598.835	572.319	595.988	564.415
band400	499.643	530.382	570.276	604.744	589.957	566.103	572.994	484.787	597.34	569.516	545.975	534.066	475.841	527.09	583.091	548.948	625.778	611.302	584.853	641.193	539.014	578.705	546.08	542.481	571.235	538.403	593.114	570.244	582.362	543.72
band401	486.207	524.706	562.952	600.722	586.575	549.104	570.131	478.875	580.225	578.983	528.513	527.746	485.571	526	584.452	557.295	634.149	619.741	599.187	636.108	531.445	577.138	542.954	539.668	564.653	538.445	581.152	571.1	600.389	558.87
band402	478.733	526.261	573.719	608.309	579.086	552.447	564.693	478.132	607.233	568.157	532.483	525.211	501.008	524.331	576.188	547.85	618.476	597.18	558.226	624.721	540.557	581.044	529.371	524.669	555.168	524.309	573.379	575.001	594.944	549.144
band403	497.44	514.864	561.404	599.262	565.327	553.364	557.403	472.058	592.535	565.041	542.137	514.75	457.074	546.296	566.661	549.519	622.571	600.794	570.837	621.399	521.654	563.626	516.195	521.793	556.526	526.108	575.231	560.041	587.327	535.877
band404	493.297	531.7	553.179	589.969	581.266	541.052	556.958	462.712	594.917	565.527	517.073	515.84	486.882	532.17	562.097	544.663	631.971	616.169	576.583	627.195	512.271	578.864	525.406	524.195	555.476	528.525	579.57	551.463	584.285	538.119
band405	478.307	527.685	560.254	601.145	563.706	526.05	567.295	469.639	587.528	555.221	517.449	500.24	455.277	511.296	557.559	543.675	644.858	609.934	577.298	622.954	522.009	567.304	516.144	513.702	549.863	520.414	580.923	552.979	589.424	529.663
band406	486.743	514.345	560.651	611.336	563.873	535.818	566.785	470.14	586.88	556.265	521.435	513.728	482.874	513.713	556.457	535.565	620.251	621.328	580.968	628.975	509.63	571.527	530.863	527.788	559.579	522.407	566.996	565.102	577.464	540.7
band407	483.613	533.164	558.903	600.222	573.833	535.077	552.292	464.491	578.812	561.769	507.688	517.125	475.577	537.947	540.99	522.335	622.891	600.868	568.623	614.8	522.665	564.932	527.592	517.74	543.662	519.496	574.782	552.411	585.968	541.802
band408	455.003	489.973	565.08	607.034	588.669	544.101	553.284	459.69	589.917	545.148	505.344	526.484	476.025	497.209	554.833	552.597	622.069	597.011	569.968	614.723	513.509	578.621	530.688	522.331	550.176	522.2	565.624	551.894	562.035	528.736
band409	477.767	534.13	555.634	592.867	573.674	551.594	552.304	458.397	595.428	553.86	511.979	501.054	463.486	510.088	555.478	549.443	643.985	615.571	568.321	614.739	524.548	568.323	515.965	513.086	540.965	517.286	570.532	547.044	579.08	529.765
band410	460.54	505.733	555.206	586.784	555.113	527.745	549.974	453.078	585.784	545.234	521.08	517.601	483.385	505.786	559.932	515.391	622.76	575.735	575.476	604.475	514.562	549.332	497.468	500.335	507.795	503.502	568.105	531.399	580.322	524.769
band411	449.423	504.394	549.426	588.951	565.692	528.329	562.916	458.058	587.314	540.692	523.681	490.839	457.269	514.248	528.783	532.273	608.662	582.156	544.544	596.551	510.261	549.731	495.459	507.434	532.427	506.248	557.719	533.076	558.127	520.986
band412	472.187	518.397	534.523	597.701	565.402	511.925	561.681	449.06	601.856	555.213	522.212	507.986	452.407	514.402	548.086	530.353	621.531	577.341	540.425	602.076	514.827	543.658	517.888	486.687	528.397	505.366	557.01	537.713	581.773	539.086
band413	462.66	532.058	558.475	556.657	561.438	555.491	549.309	452.987	580.22	547.014	488.269	504.391	461.929	508.064	556.141	524.034	625.531	591.852	563.984	612.478	516.403	555.973	517.191	516.508	533.539	509.277	572	561.022	558.119	544.231
band414	439.33	538.397	549.027	584.781	569.275	546.447	540.189	449.73	580.318	553.419	494.699	484.075	449.269	511.83	538.48	535.611	620.516	581.386	561.603	611.455	515.724	569.025	503.691	526.317	534.874	519.934	565.036	525.54	573.592	529.181
band415	487.717	513.524	571	578.41	580.389	536.611	555.087	469.285	592.277	535.998	507.813	508.688	471.569	519.48	543.439	546.303	625.015	581.429	573.631	627.735	509.171	571.325	498.142	531.864	546.864	524.207	557.322	545.536	552.761	524.521
band416	484.647	522.336	531.879	571.988	575.568	542.079	552.056	443.833	569.737	530.291	504.032	504.317	477.266	508.123	557.661	536.449	609.633	572.833	567.071	617.868	507.334	573.843	512.22	508.446	548.341	514.03	557.441	536.6	552.597	525.117
band417	456.86	513.467	549.358	571.315	557.275	542.936	560.063	470.642	547.253	541.487	534.531	501.427	463.014	514.378	558.619	545.387	609.393	598.013	571.19	614.915	509.386	569.977	514.085	524.131	546.261	512.38	556.103	558.438	570.196	521.339
band418	443.873	524.815	540.785	584.722	554.661	540.526	559.452	445.099	575.318	557.675	501.697	503.39	481.492	523.228	548.634	511.084	611.218	614.294	578.536	607.508	516.318	567.555	517.277	507.636	528.421	508.77	579.197	534.931	575.543	543.296
band419	454.987	525.518	572.012	574.917	589.822	495.221	552.668	441.733	580.546	545.881	488.333	508.09	463.508	501.244	532.399	545.814	625.131	572.529	567.893	598.833	492.375	566.733	517.874	535.853	547.177	510.686	561.638	535.091	554.122	522.852
band420	458.167	523.833	549.404	551.336	564.442	541.402	547.74	457.059	563.264	539.398	512.736	506.811	477.074	513.337	559.439	526.731	603.982	593.593	577.746	620.052	515.344	568.181	540.821	527.386	536.533	516.586	566.885	550.344	564.77	535.455
band421	486.25	523.397	549.775	560.904	549.535	543.944	546.669	444.866	576.9	555.721	502.8	516.139	474.033	516.267	567.164	545.876	659.549	585.672	529.119	603.104	523.298	566.739	526.773	501.662	535.381	512.756	586.934	553.589	573.747	539.857
band422	488.23	449.476	562.077	570.389	578.267	540.725	542.675	467.963	583.421	554.442	507.376	502.667	438.703	516.097	576.211	552.287	619.378	562.04	536.821	629.09	526.316	596.76	517.087	511.409	560.719	522.132	561.335	556.503	558.28	528.759
band423	472.99	515.385	560.063	584.068	552.059	520.988	552.277	455.163	576.558	556.806	509.877	512.414	454.319	496.062	580.556	552.539	606.702	598.243	547.313	618.197	527.849	580.502	522.844	509.708	535.499	520.977	567.889	564.135	578.599	552.407
band424	459.983	521.997	525.351	578.954	539.191	514.11	561.137	459.591	592.186	544.811	505.421	523.852	480.492	530.06	568.441	534.192	609.371	606.608	553.956	612.804	510.011	568.932	522.534	512.776	539.886	504.941	574.31	543.513	576.275	547.076
band425	534.357	541.345	533.506	589.074	561.654	567.654	555.947	456.489	586.112	548.521	507.595	535.006	500.113	517.322	514.146	533.517	603.255	617.897	561.841	637.894	528.719	573.011	518.28	507.02	554.604	522.888	580.9	575.423	560.618	536.233
band426	483.61	524.024	544.203	538.988	563.623	515.511	574.767	454.753	564.626	542.397	522.23	537.959	463.261	520.421	569.88	534.802	628.804	623.066	554.27	607.842	505.271	556.689	534.562	515.371	518.015	524.581	593.342	540.938	549.474	531.844
band427	492.613	522.433	579.065	549.481	542.154	517.662	575.736	447.755	543.057	534.612	519.364	523.927	502.857	500.538	556.418	552.413	615.353	625.042	596.869	611.069	500.513	578.472	536.012	513.175	561.198	518.373	573.403	532.984	567.768	540.444
band428	526.23	558.409	606.494	572.38	593.197	500.296	567.851	463.985	565.037	545.282	494.027	533.482	461.668	515.476	550.804	558.038	638.451	618.296	533.917	635.988	513.748	609.394	503.043	539.069	549.595	530.033	585.731	563.299	553.18	503.586
band429	505.823	545.539	586.615	596.904	557.875	569.193	571.58	463.15	578.822	553.616	554.686	541.6	478.668	539.793	550.538	526.124	609.153	592.267	554.484	610.535	506.309	554.584	521.84	543.64	551.817	521.288	590.487	565.754	580.547	531.209
band430	520.203	558.494	594.53	578.475	600.239	564.36	576.13	480.152	576.139	544.755	535.057	519.761	484.192	515.875	557.833	571.345	645.695	603.519	542.905	633.108	537.318	592.917	500.381	552.127	576.845	539.806	607.353	567.494	569.608	526.535
band431	491.077	534.233	578.092	571.133	557.795	584.014	560.947	480.351	572.172	544.296	536.007	523.843	492.772	513.688	565.211	527.279	599.542	610.397	583.778	600.304	545.908	589.026	544.463	516.421	531.202	527.744	571.205	569.524	557.878	532.415
band432	514.237	523.858	565.964	593.877	566.95	545.574	580.565	487.791	611.293	572.016	551.565	557.04	529.547	544.3	576.068	551.515	631.822	610.259	548.349	612.103	560.019	580.357	551.363	513.201	564.291	524.877	602.565	544.317	580.94	539.761
band433	502.123	548.93	589.157	581.515	602.786	543.762	561.62	467.69	573.384	562.032	506.519	544.846	478.766	551.723	562.783	553.22	632.876	583.902	537.234	630.196	520.368	571.4	547.652	562.713	550.48	539.152	600.672	540.863	580.624	570.252
band434	521.453	552.361	574.017	572.731	599.647	561.721	569.914	475.137	582.512	551.227	539.574	552.808	525.242	510.405	562.616	548.399	597.64	616.717	561.024	648.004	543.469	585.042	529.05	532.267	553.787	551.234	582.268	561.384	560.762	540.821
band435	553.903	535.927	594.731	589.389	597.542	541.077	587.985	502.674	564.739	568.242	530.444	520.885	464.201	524.663	586.765	586.473	653.575	585.966	552.262	640.323	531.626	590.909	559.117	547.831	596.359	542.265	614.625	565.788	585.908	524.812
band436	516.05	576.445	544.346	643.873	551.446	571.979	585.623	507.305	624.248	595.1	515.774	564.859	525.28	561.478	561.984	550.132	622.509	629.505	587.337	603.022	552.067	553.783	547.254	514.566	533.04	536.12	592.285	568.732	593.951	581.38
band437	527.8	558.179	614.513	614.068	612.367	592.723	588.074	496.222	627.588	582.676	554.487	552.456	515.28	542.468	573.723	574.693	608.124	654.283	560.845	631.123	577.419	595.071	536.365	562.482	587.656	532.607	570.389	599.164	584.538	560.63
band438	514.513	609.045	586.811	595.463	595.624	549.979	614.132	482.361	586.843	575.529	538.264	533.229	523.654	547.856	589.697	558.216	634.92	621.257	551.075	643.877	559.499	577.307	549.211	583.6	570.904	557.265	606.843	576.979	597.828	574.579
band439	533.5	611.633	602.044	539.981	629.434	558.803	610.434	509.796	573.956	572.653	546.387	533.932	520.063	537.877	609.569	584.503	648.731	626.55	543.917	644.884	540.811	597.744	501.392	579.314	589.727	570.224	613.595	585.376	566.597	513.675
band440	513.36	586.124	587.15	603.969	594.278	587.035	609.036	508.632	599.429	581.59	549.841	562.782	554.533	571.029	572.496	591.02	590.52	626.627	611.036	645.214	555.795	559.982	544.934	533.028	572.653	577.021	604.543	594.983	606.977	549.224
	516.225	520.744	572.676	450.017	541.342	481.57	543.749	478.739	470.525	518.959	492.378	487.421	493.343	491.665	558.156	537.307	509.795	545.974	493.272	588.703	484.984	498.263	483.114	546.52	501.658	520.761	587.676	506.502	482.663	467.211
	726.347	742.133	829.685	646.849	773.293	680.337	791.266	661.563	681.476	729.141	667.583	668.802	663.654	689.076	786.164	769.234	742.505	777.087	685.861	849.011	677.972	719.117	667.332	785.745	723.931	743.28	838.322	715.719	677.465	648.529

## Sheet: 36h
band	1	2	3	4	5	6	7	8	9	10	11	12	13	14	15	16	17	18	19	20	21	22	23	24	25	26	27	28	29	30
band1	528.176	478.722	431.42	537.725	613.796	512.071	536.979	545.379	597.625	558.546	654.388	523.388	557.875	546.966	591.96	593.358	526.568	536.07	514.363	596.959	565.403	565.147	560.542	595.248	603.703	508.756	576.27	583.649	571.644	582.255
band2	451.485	514.87	461.035	496.344	552.894	587.596	480.384	588.063	676.375	518.202	553.115	577.073	548.151	523.207	483.554	559.307	564.498	498.721	530.718	587.34	579.623	499.368	491.777	620.467	610.764	504.837	558.152	573.982	584.458	555.776
band3	505.366	458.07	417.967	501.392	509.31	565.747	539.144	553.829	540.812	522.699	605.248	606.788	534.948	514.642	557.776	568.985	478.445	538.393	516.23	571.541	570.396	521.868	577.531	556.042	547.337	488.711	527.558	527.532	504.079	605.188
band4	449.192	504.152	485.658	513.616	590.323	498.848	503.219	531.949	595.125	645.88	603.709	519.976	526.94	568.983	553.8	551.448	519.826	558.729	557.43	582.255	523.981	486.132	564.573	544.485	510.512	478.867	531.798	573.7	532.159	559.079
band5	475.174	535.03	444.38	516.167	535.31	399.798	513.271	556.082	520.719	595.093	512.545	522.145	550.202	540.463	509.996	510.23	485.77	490.769	496.743	508.905	516.299	473.926	522.142	558.77	569.028	506.333	529.007	549.266	538.302	530.811
band6	458.918	442.311	475.4	496.13	607.549	493.909	483.544	559.032	436.708	521.18	550.036	508.915	529.197	488.461	498.132	533.086	460.804	466.424	484.164	531.231	476.669	528.676	528.55	548.285	556.004	445.607	502.803	573.266	511.066	545.748
band7	423.266	419.47	456.837	503.839	494.566	472.071	461.108	553.925	455.198	530.005	545.964	512.83	500.65	509.847	441.13	491.989	520.312	529.585	466.561	498.207	444.682	448.897	545.296	584.527	552.715	489.6	469.025	547.134	498.825	533.023
band8	439.472	405.978	452.835	481.5	505.522	406.667	519.96	512.718	491.167	474.049	463.921	482.164	525.093	488.752	500.59	513.176	434.593	497.118	494.675	530.085	483.149	491.441	493.346	594.406	537.069	491.785	464.705	581.09	502.931	524.842
band9	420.495	412.77	507.285	477.302	449.73	523.566	473.753	520.226	480.75	563.377	444.752	465.685	484.229	473.112	471.188	479.775	480.192	525.035	494.064	477.014	533.636	474.235	535.085	510.867	532.211	531.77	495.714	533.822	489.978	509.622
band10	454.953	406.33	413.918	451.853	481.535	460.414	496.998	523.932	443.042	484.169	507.4	452.309	456.017	451.793	480.224	459.794	449.678	430.31	461.587	457.918	443.909	370.456	471.338	537.17	524.146	486.422	419.707	500.956	490.003	512.621
band11	436.724	440.174	415.06	442.808	464.695	458.828	481.506	505.709	467.979	503.634	466.897	494.436	451.69	488.455	470.045	470.341	509.543	424.24	470.335	491.935	481.636	558.603	449.558	526.588	496.183	542.459	468.728	502.075	504.021	500.394
band12	429.554	415.663	443.4	448.995	444.81	434.101	477.414	487.989	458.833	534.716	470.618	455.594	495.159	462.502	428.493	450.925	472.331	427.454	482.138	460.422	449.636	441.265	455.388	513.509	553.683	555.385	470.649	507.677	485.892	487.575
band13	426.155	384.226	413.17	445.744	430.765	428.172	474.633	487.231	519.052	526.344	423.964	472.576	453.891	440.651	469.946	458.582	462.785	435.873	462.922	479.67	440.656	482.426	479.054	496.909	542.549	490.77	462.111	523.858	498.108	477.99
band14	432.444	394.578	427.185	429.917	484.288	441.697	493.64	485.889	479.792	495.23	461.939	452.503	450.002	427.194	431.72	446.165	443.603	432.825	451.737	431.044	466.532	537.706	505.45	476.836	532.02	478.704	463.381	487.943	501.124	469.858
band15	425.941	419.222	418.188	424.359	449.73	463.263	505.456	486.297	434.521	479.257	444.012	464.83	433.937	422.662	431.74	435.603	441.596	432.585	444.572	438.197	461.273	462.838	469.869	516.77	559.951	470.141	461.939	503.674	486.73	475.469
band16	408.115	409.593	422.915	429.247	401.412	451.313	489.798	481.827	464.625	493.12	408.952	456.424	440.621	435.763	435.742	451.285	444.224	444.576	448.085	428.48	484.344	438.632	476.031	517.461	506.516	489.948	466.83	477.127	474.99	484.38
band17	427.061	403.744	455.25	441.306	448.155	448.778	494.713	483.907	521.375	501.011	451.891	419.352	447.81	432.151	425.962	437.073	460.962	419.493	446.608	478.143	450.662	445.441	474.842	473.964	527.012	483.77	449.297	496.049	487.116	470.148
band18	417.665	412.181	438.723	450.461	423.212	476.051	480.151	482.475	485.417	469.552	440.545	435.988	450.905	454.528	410.022	447.547	459.233	415.017	442.962	483.568	470.786	483.029	469.708	468.321	521.789	474.215	472.721	499.889	487.4	467.811
band19	427.362	405.237	442.108	430.939	430.146	461.949	478.327	478.357	483.583	522.29	410.394	449.958	457.335	429.595	438.213	415.545	441.29	402.275	473.706	469.33	470.844	481.25	459.112	528.739	520.435	509.104	460.104	486.506	470.293	483.451
band20	396.004	422.274	447.225	428.561	413.549	453.374	516.115	492.049	500.885	483.628	465.115	431.873	439.281	427.194	422.659	453.74	419.593	439.493	447.622	444.531	469.24	443.279	474.731	488.103	550.902	486.8	480.315	483.566	467.774	481.562
band21	408.27	394.344	436.34	442.522	437.31	434.667	481.346	484.682	477.469	480.399	415.679	462.333	447.781	419.966	430.235	432.805	426.82	408.192	458.566	449.442	464.552	452.176	473.254	482.388	550.199	509.793	469.288	494.752	464.009	469.601
band22	401.624	410.693	480.11	415.58	417.049	475.929	489.245	479.14	448.969	466.557	441.836	455.812	441.739	446.78	409.7	443.592	458.587	422.057	465.368	466.361	437.968	443.868	461.635	525.879	546.841	502.556	460.782	482.974	474.954	492.978
band23	423.403	416.422	461.137	448.892	452.248	466.626	489.518	480.024	458.604	508.432	434.03	440.903	464.778	442.75	418.231	442.736	450.05	417.991	459.035	478.976	451.734	444.265	484.1	474.958	538.841	491.637	476.274	519.664	502.406	472.852
band24	426.346	403.93	459.652	421.663	437.695	445.939	483.779	488.666	443.25	499.279	462.503	448.188	451.563	437.377	428.197	440.129	440.435	446.524	454.244	452.371	459.805	478.279	462.4	513.503	540.472	510.985	473.109	489.238	472.627	480.91
band25	414.908	413.57	463.28	436.061	454.792	465.515	480.838	473.527	475.708	494.475	440.03	436.37	457.254	432.963	415.173	447.41	440.849	432.882	460.427	450.34	445.435	477.559	486.715	497.818	535.431	500.259	470.737	510.641	478.249	485.258
band26	431.47	408.985	446.637	422.583	431.903	459.192	496.002	472.393	469.594	481.896	438.442	473.194	440.749	437.524	427.258	444.719	434.653	441.852	459.14	453.33	473.214	441.074	485.081	490.248	535.732	509.726	463.891	493.103	466.957	470.344
band27	414.08	418.504	457.21	426.206	405.527	464.434	501.085	473.795	431.927	485.35	434.085	454.339	454.312	423.843	419.339	448.53	456.281	426.066	471.665	463.112	449.968	506.294	468.908	493.303	545.256	498.126	466.485	494.132	479.97	470.943
band28	406.865	405.993	456.235	408.275	402.04	460.98	477.205	465.785	458.375	453.508	437.812	435.685	435.199	425.892	417.632	439.004	462.975	423.454	460.594	455.65	430.74	466.353	459.977	496.091	543.671	491.207	466.789	478.829	471.036	480.294
band29	409.321	429.27	456.955	437.041	422.792	481.535	490.339	473.886	440.083	461.929	437.994	423.461	449.492	441.597	414.872	427.457	441.59	434.533	450.748	455.673	457.338	473.618	466.262	495.63	541.065	497.333	457.73	486.199	477.914	470.281
band30	416.945	435.956	472.728	433.784	435.265	443.535	488.494	474.936	471.625	466.279	442.073	438.03	445.09	422.356	421.596	430.12	442.416	427.384	439.561	450.745	438.364	484.971	462.846	492.697	540.846	487.674	478.175	494.072	470.191	468.506
band31	418.718	423.181	456.142	434.252	431.164	462.394	481.407	469.53	446.417	457.301	433.194	433.733	437.209	423.037	409.529	438.32	459.192	415.93	453.29	451.439	459.929	483.118	463.262	486.03	526.484	478.6	468.755	491.346	473.208	473.781
band32	404.836	422.567	448.652	423.903	440.783	473.374	493.974	472.107	456.344	471.814	437.442	449.006	447.216	417.655	407.946	436.144	431.145	429.441	453.525	461.252	437.721	440.044	472.908	487.964	526.972	478.519	467.485	493.817	464.804	480.011
band33	419.609	422.311	465.473	423.117	446.628	493.899	491.609	467.145	456.312	477.754	454.976	437	438.209	429.72	403.426	441.131	432.994	410.568	447.907	437.541	433.357	449.618	467.662	490.218	537.541	497.541	459.671	481.323	465.627	470.377
band34	411.178	425.919	457.025	427.684	424.394	455.313	482.762	471.421	461.76	470.273	432.927	449.739	445.589	438.94	408.922	438.708	431.158	427.258	446.615	458.224	437.675	485.691	460.385	476.552	544.191	463.733	456.592	500.204	472.72	479.656
band35	414.417	427.896	466.212	420.917	447.655	470.081	484.671	467.404	472.375	483.497	435.242	441.055	442.185	422.959	402.549	426.79	427.199	421.341	454.477	444.207	449.649	485.809	482.315	480.842	535.703	495.141	460.685	495.155	466.009	467.397
band36	418.515	401.222	458.377	410.136	440.022	461.566	477.08	459.67	435.781	448.377	437.321	445.782	440.39	424.198	402.054	427.174	437.284	407.865	443.373	451.306	447.11	469.824	459.765	512.855	524.138	488.252	468.222	482.835	465.787	475.28
band37	419.333	418.963	468.652	421.233	438.934	459.182	492.499	464.801	472.104	475.661	439.255	438.4	450.777	423.284	412.587	447.105	433.306	413.507	449.114	447.33	445.097	439.868	459.377	478.764	540.764	479.119	458.184	487.7	468.174	477.635
band38	409.746	408.263	446.272	416.298	422.102	449.121	477.162	458.849	439.604	483.71	427.37	445.455	445.2	421.67	395.726	424.562	433.24	412.834	450.617	451.592	437.052	467.044	461.977	477.891	537.561	478.741	463.712	486.922	470.69	476.832
band39	411.055	412.574	453.395	411.531	423.951	450.535	484.24	457.899	457.219	458.546	426.588	449.206	443.104	419.442	396.15	433.118	432.117	418.747	444.846	439.054	450.649	474.5	479.8	494.388	535.545	477.681	460.247	494.775	463.509	477.672
band40	410.427	408.559	455.017	417.511	433.77	449.889	476.141	458.815	465.875	456.754	429.43	448.042	445.396	423.927	392.529	434.923	430.325	405.948	445.434	451.306	430.76	461.5	458.069	471.927	539.321	501.126	452.506	493.907	458.624	480.924
band41	405.395	409.9	459.09	412.252	428.323	455.98	481.946	458.138	451.344	456.989	438.679	441.533	441.028	421.024	391.507	441.097	430.934	416.148	451.162	449.483	443.305	471.044	469.1	496.345	539.618	484.622	462.848	482.416	459.527	478.448
band42	410.515	421.007	447.265	414.816	425.23	481.222	484.892	449.708	462.583	475.77	434.806	445.673	448.167	415.237	395.818	439.775	428.823	413.035	441.321	449.109	449.89	467.544	456.758	492.321	540.386	480.319	458.15	490.494	456.953	473.552
band43	408.879	412.178	459.73	416.075	427.252	466.424	479.649	447.543	459.219	470.082	439.552	440.788	444.486	412.983	390.016	435.942	434.025	412.122	441.193	451.442	437.078	459.176	461.904	479.83	513.577	475.193	464.073	481.55	465.977	480.031
band44	393.472	398.9	451.392	409.011	430.044	465.939	480.908	456.674	461.833	452.563	424.636	440.23	438.583	415.369	401.865	428.655	434.558	415.913	442.041	449.68	444.727	476.721	458.065	487.855	528.028	471.452	458.599	483.313	458.755	480.623
band45	407.344	409.244	449.082	415.23	427.765	453.232	480.814	448.886	466.312	465.224	427.055	441.067	442.002	408.565	399.482	434.884	434.022	409.834	442.864	457.442	446.636	448.706	453.273	495.994	536.732	483.83	456.222	486.698	453.293	484.687
band46	400.693	416.756	447.803	418.712	417.593	444.222	475.664	451.326	476.979	465.754	430.891	447.545	440.376	414.804	388.04	432.981	443.038	420.066	438.995	458.003	440.052	457.25	467.827	480.648	528.748	480.17	446.372	489.972	464.905	481.359
band47	403.812	416.656	451.877	409.495	438.04	458.242	475.722	450.313	447.271	467.831	439.491	438.297	449.986	411.7	387.897	437.502	442.208	412.633	435.451	450.731	435.799	464.735	450.208	476.903	536.992	467.259	454.347	489.023	465.578	480.014
band48	402.061	409.774	465.105	406.811	441.358	455.192	479.513	450.012	445.885	462.295	432.758	446.77	444.726	417.448	394.195	437.337	431.401	404.707	434.301	445.347	435.532	481.765	462.9	478.624	529.675	485.341	455.73	486.855	464.598	482.489
band49	407.935	419.867	456.365	412.12	430.115	457.333	467.84	455.711	446.656	469.333	418.23	449.848	448.91	415.517	389.738	438.77	435.164	407.188	436.373	441.769	439.734	460.618	467.304	475.976	534.154	484.926	455.789	484.749	455.289	483.82
band50	407.928	419.937	453.685	411.45	440.535	458.192	470.793	448.823	454.229	462.76	433.042	436.782	444.203	412.668	388.229	433.715	436.473	415.961	444.565	449.643	444.403	467.338	464.215	482.224	536.724	460.148	457.517	486.401	457.83	486.322
band51	401.761	407.441	448.368	408.22	447.049	472.323	476.136	455.332	453.104	466.634	424.521	448.139	444.223	414.108	389.787	430.335	440.457	402.035	441.596	445.959	441.136	468.838	466.3	488.382	538.431	464.474	459.857	483.811	454.009	488.132
band52	407.796	411.644	454.897	406.122	437.031	453.253	482.788	451.192	457.865	461.224	417.273	445.624	451.043	417.039	387.762	435.232	441.091	410.074	442.808	459.027	433.987	484.029	463.25	491.206	535.187	474.17	458.721	492.088	465.998	490.392
band53	406.45	423.211	448.582	410.77	442.204	441.818	477.158	445.782	458.281	460.038	433.509	442.612	451.187	422.151	394.13	442.365	435.987	415.502	443.781	454.473	435.214	452.632	462.969	496.994	526.724	470.119	461.964	495.22	466.382	489.984
band54	405.247	424.807	445.608	403.059	428.097	443.414	475.892	444.037	450.948	458.219	431.545	450.17	448.901	410.591	395.428	436.85	433.618	411.638	441.52	445.905	447.766	481.368	470.373	485.388	529.817	470.867	463.451	488.91	458.906	492.886
band55	406.667	414.77	449.18	407.905	424.04	456.667	473.494	447.736	455.76	462.514	432.612	444.339	453.792	423.619	387.693	429.753	449.861	408.493	434.753	455.833	436.214	474.441	456.231	493.139	532.862	474.2	455.354	487.796	461.485	491.94
band56	401.871	425.337	451.308	406.436	432.801	469.909	472.442	446.788	452.667	463.383	436.291	450.03	446.18	417.681	392.655	432.633	436.426	420.873	441.335	448.592	436.117	465.676	467.873	494.964	536.126	472.467	458.138	480.15	456.096	489.864
band57	401.965	422.826	447.335	405.992	438.549	475.677	474.08	451.051	455.385	466.596	441.327	457.461	448.277	415.793	385.924	439.036	433.151	412.681	440.869	448.82	442.727	469.868	465.554	488.036	532.215	481.97	459.957	483.742	455.253	491.704
band58	404.256	418.296	452.85	402.702	439.283	462.909	467.247	444.732	443.24	458.251	431.921	451.879	452.502	413.381	389.744	440.011	437.028	404.397	440.382	449.854	434.305	451.059	459.462	487.073	536.415	470.096	463.839	485.984	449.777	492.169
band59	402.313	421.833	449.257	399.589	434.429	460.848	474.786	448.866	455.823	456.645	430.606	445.248	449.564	422.95	384.377	434.388	439.221	409.105	437.807	453.476	434.571	481.015	461.469	472.63	530.073	471.215	457.302	486.651	457.147	491.418
band60	404.094	418.422	445.762	396.019	426.204	452.505	468.908	443.849	451.135	455.098	436.667	452.339	450.974	414.8	387.709	431.26	430.562	407.694	434.788	452.551	440.123	472.162	459.435	477.558	534.581	481.259	457.274	482.512	452.301	490.41
band61	398.789	425.87	448.942	398.809	452.637	453.172	466.838	439.729	440.208	457.208	432.788	455.194	450.598	418.644	386.323	430.974	438.666	406.192	429.637	452.18	440.175	462.603	464	479.315	526.264	463.444	455.098	474.406	453.145	492.2
band62	395.505	421.926	444.123	400.031	447.779	458.081	475.995	441.623	447.979	454.639	433.133	445.461	450.277	418.575	390.238	433.182	438.435	401.249	435.345	456.871	424.195	478.779	454.338	491.061	523.329	466.978	461.696	478.618	455.199	492.969
band63	399.188	410.696	444.215	402.344	440.208	462.677	469.779	442.091	450.562	457.361	432.776	442.636	450.781	421.211	388.816	438.534	436.054	406.786	433.57	458.129	437.13	472.529	467.742	481.042	522.455	466.985	451.17	481.891	452.561	494.794
band64	395.252	412.285	443.562	402.559	437.226	453.01	470.908	439.136	446.896	452.366	427.964	454.503	451.896	413.209	386.695	432.165	436.082	408.563	436.396	448.673	431.675	469.015	459.158	481.733	527.728	474	456.415	480.915	455.463	493.538
band65	400.397	414.726	447.025	400.634	444.982	448.182	467.304	442.012	445.333	465.585	429.897	454.448	447.219	415.42	382.179	437.489	424.991	409.026	432.161	450.024	433.403	457.647	460.965	482.327	530.093	462.163	458.311	479.209	449.03	491.214
band66	396.589	417.067	443.19	396.613	444.805	469.636	469.442	439.598	445.708	439.836	431.248	443.788	448.526	412.369	385.567	430.622	432.016	407.066	432.313	443.639	434.39	472.147	452.388	483.745	521.992	457.452	454.857	481.641	450.285	491.461
band67	397.526	414.97	445.515	395.425	434.881	457.192	466.402	439.367	449.823	464.262	426.509	449.497	452.469	414.625	388.635	435.348	430.356	412.934	431.941	451.823	434.922	457.221	455.792	488.212	524.52	471.637	454.331	476.979	449.662	496.671
band68	396.732	419.007	444.435	398.913	445.881	468.02	469.788	440.272	444.438	450.77	421.745	458.812	449.014	411.216	384.753	431.764	433.644	404.886	432.256	449.041	430.013	464.897	459.923	477.406	520.959	468.444	452.964	475.623	445.502	495.861
band69	395.71	416.856	443.225	399.9	449.903	462.626	465.76	441.414	437.062	452.372	427.503	454.994	451.836	419.929	381.453	432.09	429.653	409.323	434.655	450.578	430.143	466.456	456.654	475.297	526.512	464.956	447.639	476.535	448.662	494.131
band70	395.853	413.741	449.673	399.759	440.673	456.879	464.915	434.378	436.812	445.12	440.461	452.006	451.875	414.601	384.491	433.116	432.858	408.301	432.831	454.629	434.896	468.691	458.742	479.491	523.427	468.941	452.544	477.333	448.311	497.751
band71	393.894	410.178	448.87	394.725	448.097	456.697	467.398	432.321	435.875	451.404	430.364	451.842	450.35	413.528	387.076	435.547	431.615	404.869	433.741	454.323	426.188	459.544	461.596	481.527	524.045	461.644	448.744	476.196	447.661	498.279
band72	392.908	424.2	447.603	398.672	444.487	462.586	461.021	438.056	440.906	453.011	433	456.648	449.876	415.619	379.056	437.294	431.609	399.624	431.908	447.248	433.916	458.265	454.323	478.133	528.309	460.281	457.678	474.506	445.663	498.008
band73	395.603	414.848	446.26	390.533	445.226	463.182	468.642	433.503	444.729	456.186	433.018	453.976	447.044	414.062	381.522	433.298	433.353	402.044	433.123	451.374	429.766	454.265	456.723	477.121	521.549	459.533	446.424	472.284	445.153	500.691
band74	389.468	424.711	440.125	393.516	449.292	462.879	471.558	435.151	450.865	450.148	430.455	448.976	450.018	417.69	382.74	430.968	433.823	400.856	430.952	453.173	425.513	450.779	452.246	475.042	522.52	458.778	447.102	476.93	446.181	497.797
band75	397.35	417.833	449.33	395.55	447.677	469.485	463.306	435.623	445.573	452.027	425.388	453.442	454.313	415.246	381.321	437.208	430.246	401.563	429.941	450.82	432.279	480.618	460.327	478.6	522.276	460.059	452.431	476.305	446.72	499.927
band76	397.09	423.252	445.572	395.38	452.168	458.616	460.673	434.131	440.521	448.918	420.012	457.545	451.385	414.377	384.123	430.088	433.237	408.821	429.737	451.48	430.357	462.309	456.088	481.194	519.179	462.452	446.243	472.778	445.819	502.599
band77	396.346	423.789	439.558	397.155	447.137	462.939	464.336	435.651	440.385	445.459	420.442	458.788	452.162	415.806	379.666	434.509	430.763	406.498	429.093	452.922	433.084	451.647	457.446	475.285	520.602	452.363	443.481	471.186	448.009	502.516
band78	395.847	421.785	441.493	392.225	457.965	463.222	464.487	431.94	437.573	448.202	428.327	452.406	450.113	413.278	382.731	431.451	429.038	407.69	427.658	450.146	428.266	464.691	455.212	478.782	519.472	455.452	444.678	472.072	442.451	504.289
band79	394.481	423.822	446.683	394.431	456.044	464.596	466.619	428.764	443.25	453.579	422.121	458.303	456.26	415.409	384.058	434.133	434.151	401.463	430.535	453.139	428.058	465.088	458.1	479.418	517.789	463.104	446.44	474.987	441.597	503.537
band80	392.789	426.522	448.005	398.467	456.159	467.495	463.254	429.053	440.99	454.781	428.176	449.285	453.714	416.662	382.787	428.953	434.079	403.533	429.316	450.881	430.052	458.353	453.062	475.552	521.524	460.452	447.556	474.798	444.251	503.047
band81	393.924	422.407	447.793	390.038	457.279	463.727	457.235	431.451	438.219	445.716	431.873	460.061	452.361	415.278	380.045	431.856	432.252	404.31	425.528	451.095	435.019	461.426	451.492	469.394	523.711	461.363	446.027	473.305	440.635	506.783
band82	394.501	423.756	449.467	395.817	446.805	463.263	464.341	430.906	440.26	444.311	427.97	459.521	452.278	412.649	381.664	426.88	431.246	408.712	427.117	458.173	430.279	477.353	459.046	479.358	520.756	454.963	448.172	466.421	442.517	504.656
band83	393.577	425.678	444.462	393.22	461.633	463.818	459.762	431.297	446.938	447.038	432.133	457.764	448.864	413.963	380.43	425.547	431.088	403.808	429.057	451.388	428.552	459.75	461.619	473.885	517.187	456.956	447.247	472.91	442.411	504.059
band84	392.215	426.007	446.988	393.13	453.221	459.192	461.713	427.844	440.354	448.88	427.455	460.145	451.361	412.425	374.697	428.526	432.981	401.188	423.848	453.344	426.162	465.132	455.119	470.4	517.699	454.141	444.932	470.778	438.446	506.161
band85	393.736	424.33	445.382	394.82	449.54	466.697	463.558	426.238	434.302	448.787	427.188	456.109	451.861	413.42	378.962	426.848	432.432	401.996	424.812	453.888	425.364	472.088	449.931	472.115	514.894	455.052	442.011	471.987	439.714	506.766
band86	393.838	419.222	440.678	393.122	451.394	462.01	455.988	430.929	434.406	451.328	427.394	458.358	451.026	415.491	378.733	426.833	432.353	412.511	419.547	452.653	427.636	475.132	455.162	471.412	519.236	454.4	441.259	472.416	438.204	506.441
band87	391.885	419.593	448.165	393.344	453.283	469.515	463.56	429.2	445.188	445.093	424.321	453.236	451.167	416.151	375.827	428.773	432.344	405.354	428.199	454.588	424.494	481.971	451.965	476.636	518.065	458.067	439.444	470.974	439.943	506.645
band88	395.528	421.248	444.233	395.262	458.451	460.616	460.736	426.858	443.198	444.94	428.297	461.364	453.089	410.446	381.762	428.878	433.306	396.777	424.577	458.656	428.545	457.088	450.762	473.182	517.037	460.126	441.714	466.659	441.392	507.594
band89	389.998	422.133	444.95	388.77	458.261	472.101	461.315	424.818	437.76	451.098	427.721	455.073	450.817	412.657	377.803	425.762	431.098	402.825	421.708	454.857	426.61	456	453.465	471.442	520.337	450.726	442.721	466.592	442.091	507.201
band90	392.121	418.519	443.91	391.716	458.96	462	456.471	427.584	444.812	449.497	426.376	462.067	455.343	409.789	375.352	428.032	434.186	401.769	420.416	453.388	430.708	474.338	454.585	472.794	514.955	446.889	442.537	468.429	438.934	508.302
band91	392.669	421.233	442.905	387.886	458.991	463.515	460.167	423.512	438.781	447.825	425.194	451.139	454.255	413.733	375.978	427.747	434.473	400.581	423.114	450.612	430.578	463.779	452.335	472.321	511.866	454.037	444.753	469.695	438.853	508.904
band92	394.36	418.485	442.785	392.255	462.062	472.566	456.734	425.322	434.125	448.098	431.339	460.43	455.502	410.666	377.135	423.644	431.445	399.384	421.61	456.17	426.909	461.485	451.285	466.43	515.435	452.119	440.558	466.163	438.882	506.483
band93	390.616	427.444	444.7	391.872	457.717	466.03	457.009	424.77	438.906	448.421	425.067	459.255	455.81	410.735	378.65	430.667	430.902	399.93	421.984	450.922	423.773	468.632	456.223	469.758	517.626	446.556	440.995	466.442	441.355	508.886
band94	389.812	424.074	444.625	389.05	450.336	465.354	458.014	422.016	430.125	446.169	424.291	453.339	451.378	409.011	373.928	422.97	430.543	403.052	416.128	452.027	424.844	462.971	449.092	471.539	508.602	444.704	436.168	464.61	434.947	508.887
band95	391.331	421.352	441.377	387.106	454.518	469.808	461.209	422.41	434.458	448.399	424.382	456.394	451.869	408.832	377.747	425.288	425.549	400.249	417.199	452.667	425.565	450.353	455.235	474.37	512.008	449.733	437.685	464.437	434.212	510.495
band96	389.311	426.081	446.342	390.689	448.867	462.384	457.468	423.528	435.052	443.683	420.921	453.552	451.939	408.151	376.558	423.524	427.325	398.463	422.014	456.67	425.227	480.75	451.035	470.2	515.114	453.704	435.288	466.096	435.097	508.687
band97	389.935	422.359	446.035	388.725	453.451	461.394	454.755	421.31	436.969	437.191	418.812	456.679	450.419	407.713	376.448	425.541	423.24	399.716	419.373	453.602	425.26	452.015	446.177	467.806	513.61	450.067	431.624	465.514	436.189	505.759
band98	389.057	419.704	439.817	391.686	453.925	463.313	459.395	419.618	431.667	440.634	422.806	451.83	450.041	407.683	375.661	422.921	425.268	400.371	417.413	454.952	419.214	450.588	451.277	468.382	511.65	440.23	434.853	463.269	434.873	509.149
band99	388.384	423.13	442.212	391.403	456.035	466.747	456.144	419.93	429.208	438.852	417.376	457.606	449.962	406.095	372.973	422.369	427.868	397.507	414.924	453.622	422.279	475.353	447.358	468.115	513.118	438.541	437.773	463.599	432.413	508.605
band100	388.127	415.656	444.173	387.131	457.5	463.949	457.569	418.764	437.073	442.131	414.321	458.958	451.012	407.054	371.791	420.408	427.114	392.769	414.845	452.772	419.571	465.721	451.608	469.824	509.386	446.304	436.145	460.512	430.786	509.222
band101	388.863	416.752	447	387.725	452.04	459.374	455.701	418.332	435.969	437.76	418.745	454.115	452.083	401.407	367.807	424.899	419.7	396.266	414.057	455.31	421.325	464.721	446.654	468.873	504.228	439.141	433.918	463.253	430.981	507.365
band102	385.632	416.581	438.145	385.569	452.659	456.051	455.386	418.31	434.094	439.366	414.8	460.145	450.564	405.241	374.175	422.444	425.855	392.865	409.594	453.35	423.948	464.029	445.054	468.824	509.785	441.267	433.955	462.576	434.722	506.553
band103	387.043	422.144	434.663	380.727	457.018	463.636	453.212	417.874	434.708	438.519	417.442	452.176	451.128	404.325	367.063	422.006	426.095	393.882	412.147	448.561	418.818	460.118	445.277	466.079	508.004	436.044	431.206	462.452	431.968	506.99
band104	387.337	416.122	441.2	384.595	449.128	455.232	452.482	414.599	433.385	438.732	423.176	452.733	451.005	403.651	368.872	420.139	419.183	394.293	411.404	448.031	412.351	461.206	444.912	464.406	512.642	434.096	432.961	458.778	430.773	505.972
band105	381.978	414.9	434.49	378.773	454.513	464.202	454.456	415.792	429.719	438.814	415.806	456.709	448.888	406.808	368.655	418.513	423.533	395.083	414.218	449.5	419.747	465.265	446.715	463.194	510.073	440.578	432.615	458.196	429.697	506.919
band106	383.937	417.411	434.58	384.286	451.208	454.111	452.631	415.456	437.99	436.437	417.261	454.273	450.33	407.062	365.448	420.034	424.552	395.275	410.231	451.139	423.864	461.441	442.95	458.139	508.939	441.77	430.156	458.186	428.691	506.678
band107	386.204	420.885	436.385	382.881	454.575	458.394	453.428	415.047	426.615	433.268	412.479	450.764	449.012	408.17	370.096	418.212	421.603	391.476	408.245	447.697	416.682	449.956	447.577	461.194	504.654	441.452	434.204	459.935	428.986	505.288
band108	382.2	419.763	436.48	379.527	444.947	464.879	447.713	415.826	421.802	434.322	415.715	454.358	448.869	400.961	369.596	414.515	419.987	391.978	407.245	449.177	418.935	450.662	439.908	460.848	500.435	438.519	426.819	453.687	426.493	504.687
band109	382.047	421.981	436.045	377.105	453.177	456.677	448.694	414.721	422.917	430.661	410.97	449.503	448.789	403.953	365.935	415.727	420.773	389.074	407.613	443.201	412.305	467.603	443.473	457.079	506.756	439.926	430.084	454.411	426.601	504.922
band110	383.027	412.319	430.035	375.492	446.106	464.525	449.633	414.709	424.979	435.333	409.77	452.582	449.42	404.082	363.632	412.521	422.202	391.917	405.915	450.901	415.078	464.441	445.985	458.848	506.679	442.37	432.458	451.253	426.725	504.855
band111	380.589	416.274	432.055	378.109	445.447	458.04	446.819	412.145	428.24	434.279	412.442	449.721	446.45	402.317	365.343	413.579	419.483	393.917	404.979	448.194	420.721	446.647	445.804	456.467	505.102	437.933	427.336	452.535	426.661	504.473
band112	380.382	417.552	435.615	380.977	452.133	459.374	450.153	411.678	427.448	432.12	414.133	450.727	447.315	402.767	365.868	409.74	418.42	390.651	403.72	446.442	415.474	456.574	439.219	453.976	504.419	436.956	428.764	448.509	422.219	505.649
band113	381.431	418.037	432.543	376.216	445.447	452.232	451.358	410.475	420.771	427.836	408.812	450.188	446.188	400.328	363.435	412.745	420.243	390.349	406.352	447.136	416.247	452.147	443.469	451.291	502.35	438.348	427.887	452.881	422.546	502.808
band114	379.564	414.119	427.355	374.1	448.996	452.192	445.631	408.146	422.125	429.497	407.976	445.194	445.187	397.369	365.031	410.12	422.369	391.275	405.786	445.799	410.253	463.044	443.081	458.588	499.329	436.948	429.506	452.059	421.361	503.469
band115	378.562	409.73	432.567	374.738	446.363	457.929	447.779	409.21	426.542	431.24	413.091	445.224	444.294	396.892	364.504	409.099	417.716	388.127	402.114	445.548	415.377	452.706	445.331	458.503	501.427	440.667	425.009	447.765	418.558	502.022
band116	379.781	412.544	427.902	374.508	452.752	457.04	446.148	410.265	413.771	429.208	407.194	444.758	441.96	400.552	361.769	407.341	417.199	388.354	401.021	445	410.266	454.309	442.415	455.788	498.22	433.748	426.825	446.16	419.834	501.888
band117	375.315	407.011	427.725	377.528	450.243	461.869	444.866	406.568	426.469	432.415	409.358	450.224	443.732	398.455	364.673	411.21	412.943	389.314	404.098	444.238	407.455	460.221	437.231	453.588	505.724	432.378	426.234	447.137	418.212	501.883
band118	380.229	409.97	425.027	372.753	444.929	451.212	446.925	408.477	418.229	427.59	407.333	446.315	445.882	399.649	361.484	409.798	414.767	388.485	404.693	447.677	413.032	454.044	444.323	454.273	496.76	437.444	422.832	450.726	417.088	501.009
band119	380.229	412.889	426.048	373.061	452.628	451.96	442.184	406.755	423.229	430.322	406.43	450.242	445.281	398.625	362.312	409.558	415.577	396.205	403.796	445.748	408.571	452.676	446.469	453.194	495.675	438.674	421.696	450.527	419.407	502.597
band120	378.309	412.411	423.238	376.045	459.553	442.182	444.042	405.612	426.458	429.891	407.406	454.309	445.495	398.647	359.462	409.29	417.842	393.55	403.535	443.84	419.994	443.647	444.273	452.515	496.593	439.326	423.481	448.031	419.076	500.325
band121	382.137	408.526	427.373	374.655	461.053	452.697	441.713	406.855	419.24	425.459	407.273	454.527	446.508	398.709	362.758	415.348	418.249	397.253	405.908	447.415	417.519	446.25	449.719	449.63	492.5	437.111	422.494	451.395	419.719	503.476
band122	382.425	409.459	425.433	375.748	456.575	451.455	443.391	401.895	426.896	434.459	406.721	455.964	447.937	402.797	365.141	414.326	416.259	401.031	407.957	450.167	418.201	446.147	445.892	458.273	500.061	443.148	417.571	452.99	421.039	502.568
band123	382.689	412.5	428.647	376.975	461.801	445.444	447.033	401.859	432.177	435.596	407.994	457.618	452.304	403.746	366	416.717	419.066	400.502	407.016	451.259	414.318	457.471	448.612	458.933	493.366	439.015	419.553	455.716	422.142	503.846
band124	384.583	409.741	422.88	378.163	467.181	447.323	441.833	402.705	425.667	439.372	409.588	464.303	453.315	404.131	365.762	415.148	419.994	401.419	411.313	451.279	418.429	446.647	452.669	456.964	494.476	452.319	418.025	457.93	421.396	505.887
band125	383.401	410.004	421.125	380.775	469.969	446.091	441.988	402.02	436.812	439.186	417.612	464.933	454.411	403.638	363.179	421.788	420.208	404.712	414.822	455.034	424.058	444.074	457.569	459.764	495.272	447.193	418.336	461.77	424.94	507.037
band126	387.444	419.519	422.79	383.413	464.801	447.313	441.842	400.505	432.833	438.978	417.43	464.079	456.433	406.681	368.628	420.318	424.237	406.397	413.997	455.973	427.279	448.882	457.842	461.994	493.476	448.015	415.497	460.385	427.296	511.131
band127	389.652	416.944	423.25	385.652	464.053	446.667	439.753	404.256	438.802	447.792	421.545	473.685	461.757	413.028	367.269	425.268	422.915	408.393	416.307	460.378	429.617	445.103	457.715	465.024	491.72	456.089	415.22	463.209	430.612	513.768
band128	392.656	420.685	421.442	385.75	478.23	445.101	441.84	405.938	443.062	444.536	425.758	473.285	462.659	414.97	373.549	425.854	431.89	407.223	420.589	461.204	434.338	451.735	456.242	467.618	493.48	452.044	412.673	469.065	431.815	517.058
band129	394.425	423.948	420.75	386.466	478.142	443.778	438.965	407.651	450.573	447.874	425.842	471.079	465.735	415.841	374.442	432.058	436.142	414.009	421.366	464.813	435.123	455.029	467.081	470.915	491.179	466.081	411.234	469.871	436.006	520.041
band130	398.376	430.067	430.848	391.319	483.788	452.545	442.473	413.073	448.146	449.601	432.545	483.127	474.312	423.752	376.72	437.524	437.035	418.852	431.263	470.167	439.649	447.397	475.385	474.497	502.386	467.548	415.535	476.793	441.581	523.491
band131	401.569	431.189	429.945	396.405	490.535	453.515	446.169	415.152	451.104	462.776	435.697	484.455	480.564	427.817	377.865	438.152	439.158	421.205	430.152	476.65	442.695	457	470.408	475.158	505.52	469.852	417.58	479.421	448.098	529.62
band132	403.777	438.215	433.978	399.177	491.699	455.848	456.266	420.272	448.042	461.077	436.691	485.612	483.732	432.94	384.202	442.373	443.691	426.79	435.427	483.429	444.539	467.235	477.419	481.339	507.577	467.319	419.528	485.837	449.387	534.591
band133	410.701	445.163	441.665	403.111	500.642	464.949	461.687	424.844	459.208	464.437	446.491	494.836	490.914	432.95	392.455	449.258	452.744	429.066	439.088	487.905	448.695	468.235	484.746	493.903	515.163	472.556	425.562	492.238	455.711	543.323
band134	415.462	443.73	443.848	407.948	501.009	473.929	466.087	428.992	459.583	473.191	452.867	494.891	491.136	440.448	394.61	454.028	457.066	435.31	443.634	490.153	449.753	475.397	488.396	495.964	521.191	483.267	427.98	494.106	460.536	548.712
band135	419.434	448.856	448.79	412.506	513.912	481.525	470.816	432.888	465.25	478.421	449.648	508.691	497.59	443.957	391.305	454.528	456.612	441.891	448.962	495.255	459.994	478.353	493.738	503.533	528.866	491.659	434.354	497.855	465.012	557.403
band136	423.564	457.404	456.885	415.189	518.226	481.515	481.864	439.835	478.385	485.164	455.63	509.867	504.836	449.332	400.424	463.487	463.871	445.362	452.592	500.177	467.26	484.574	501.873	510.321	534.366	490.348	438.152	503.969	467.021	562.146
band137	425.313	465.259	464.865	421.225	522.673	495.061	487.532	446.619	474.521	494.104	469.315	521.345	509.106	452.136	408.204	464.826	467.71	451.437	459.415	508.561	464.188	492.5	502.473	518.37	543.772	497.785	442.156	509.295	472.442	571.128
band138	432.532	466.841	471.675	425.997	531.96	493.798	490.127	451.632	486.99	495.497	470.794	529.655	515.558	458.974	412.141	472.189	477.808	456.699	461.914	513.293	481.039	510.265	514.327	521.018	550.61	510.689	446.583	517.178	480.642	577.54
band139	438.687	476.874	476.613	432.067	537.19	505.687	500.412	456.607	492	502.798	480.097	533.679	524.945	466.418	418.143	479.013	482.448	460.293	468.297	522.463	486.455	501.118	524.177	529.661	553.805	512.407	451.937	525.708	486.909	585.119
band140	441.288	471.278	480.723	434.334	545.558	508.909	502.294	457.958	491.469	510.716	478.63	538.788	529.049	469.261	421.081	484.592	484.476	469.17	471.551	522.667	486.279	510.515	525.188	531.818	563.48	520.274	459.12	529.855	490.388	590.549
band141	447.286	484.374	480.71	436.894	551.473	518.566	509.532	463.307	495.969	514.208	483.394	540.891	534.309	472.345	425.612	489.236	486.028	469.961	477.812	527.027	491.838	516.382	531.569	537.036	562.228	527.489	462.027	535.672	492.931	596.457
band142	446.542	477.53	487.192	439.762	551.217	518.556	509.864	465.631	508.448	515.448	487.448	543.63	536.758	474.534	425.379	488.959	489.744	474.908	479.876	533.633	492.312	520.088	537.873	538.788	567.215	527.23	466.757	537.16	496.852	600.263
band143	450.656	483.622	488.945	442.017	551.389	521.535	515.082	468.426	512.635	518.208	489.897	551.03	537.592	477.567	429.578	493.979	494.016	478.07	485.079	539.095	500.76	512.456	536.512	541.358	575.65	532.652	466.152	538.703	499.693	604.615
band144	450.299	484.796	486.517	442.623	561.394	521.758	514.273	472.773	507.323	520.158	494.127	558.139	542.472	485.36	431.233	495.378	503.303	478.087	486.705	539.214	500.935	523.838	541.277	546.309	578.012	535.415	469.896	541.432	502.819	609.01
band145	454.29	488.67	490.562	446.627	563.102	522.586	520.134	477.12	509.656	523.328	500.194	557.77	548.46	487.088	433.525	499.255	501.896	484.345	489.919	541.136	500.63	525.309	542.765	551.897	574.959	534.244	471.8	545.568	505.25	611.717
band146	457.726	488.422	494.955	450.897	566.774	525.97	522.68	478.378	517.219	526.191	497.479	561.055	548.861	487.075	433.004	501.206	505.486	483.459	492.959	544.422	508.325	526.985	545.608	552.503	581.252	539.719	471.741	551.421	508.975	612.318
band147	456.149	498.248	498.283	452.873	562.889	523.778	527.744	480.895	512.521	530.016	497.758	562.588	548.323	493.106	433.439	505.273	505.896	483.336	492.948	546.405	505.214	526.029	547.081	551.43	584.439	547.415	475.091	553.057	510.251	616.157
band148	459.802	496.507	499.363	451.484	576.509	530.838	525.569	483.463	519.479	524.459	502.618	570.345	552.702	493.429	437.767	507.217	509.416	492.459	496.822	548.194	511.929	539.382	548.454	563.988	589.87	546.615	481.068	552.248	513.273	616.628
band149	459.93	507.048	505.517	457.023	565.133	526.758	531.666	485.839	518.052	531.23	506.679	574.17	558.148	495.922	439.251	510.94	511.114	489.668	500.261	553.806	510.708	526.353	551.635	564.024	589.988	548.911	482.506	560.77	516.858	622.583
band150	463.28	506.893	504.835	458.97	575.319	539.293	530.828	490.745	523.865	538.612	512.642	570.642	561.48	498.649	442.471	511.504	513.931	495.201	500.846	557.003	518.305	540.794	558.327	560	596.959	559.407	489.592	561.801	519.727	625.105
band151	462.922	509.07	503.21	458.739	579.35	540.949	533.819	494.105	528.635	542.153	508.927	572.667	561.093	502.319	442.623	513.584	513.243	497.502	502.573	557.398	517.351	539.574	554.496	563.188	599.041	552.326	487.739	563.093	522.887	627.147
band152	465.37	505.196	510.827	458.197	581.058	537.121	538.941	496.697	527.938	539.541	515.303	574.212	567.362	504.866	442.114	514.925	515.445	503.013	502.264	560.643	517.675	547.662	559.873	565.655	602.057	553.215	488.118	566.55	522.053	628.955
band153	466.215	511.374	508.77	463.052	578.173	541.636	538.193	498.546	533.604	545.716	517.133	579.691	567.069	509.375	445.839	513.352	522.678	495.956	505.345	563.282	520.032	530.515	557.119	564.382	600.878	552.615	492.537	563.817	527.196	633.643
band154	466.667	515.193	516.067	465.303	576.637	544.929	545.256	502.643	534.427	549.53	516.655	574.285	569.924	510.776	449.543	517.734	526.224	503.009	507.083	567.007	516.916	534.221	564.492	572.206	603.955	563.207	494.696	566.853	529.495	633.137
band155	470.474	518.252	517.112	466.945	585.832	544.354	544.035	503.979	537.51	550.301	518.836	577.188	572.971	516.246	448.769	520.605	522.29	506.031	507.851	569.956	523.662	544.471	564.312	572.03	613.435	565.6	498.342	570.145	532.162	637.193
band156	469.802	515.27	515.74	468.633	584.186	556.343	550.193	507.226	540.896	550.585	515.855	580.982	573.924	512.466	451.238	522.526	525.145	505.921	512.805	565.776	521.948	549.132	572.1	577.097	615.264	569.259	500.181	571.845	533.235	641.895
band157	473.235	515.985	518.57	471.764	591.708	550.475	556.739	508.652	541.865	552.492	524.497	589.612	577.22	516.873	453.09	521.897	530.256	506.825	514.273	572.235	530.721	554.103	572.054	576.745	617.073	570.207	503.798	573.287	535.166	644.213
band158	475.843	526.696	519.273	472.716	589.195	552.152	559.68	509.014	545.458	555.246	522.661	591.8	579.249	520.438	453.334	530.047	532.306	515.672	517.629	577.194	527.545	547.544	573.935	576	619.02	574.896	497.617	578.085	538.091	645.258
band159	474.89	523.663	522.013	475.248	594.394	556.788	561.184	509.971	545.573	556.328	525.867	589.648	580.124	523.086	456.085	528.489	530.495	511.651	518.197	575.177	534.208	553.897	576.981	580.267	623.317	572.733	504.365	578.695	538.796	648.573
band160	477.793	522.874	526.4	476.227	596.124	560.152	560.779	508.991	543.323	557.47	523.218	590.794	579.102	521.828	457.148	530.77	536.274	517.166	519.059	574.718	531	556.853	576.285	583.976	619.809	573.104	505.633	583.897	540.994	649.841
band161	476.718	518.715	526.56	475.573	592.907	555.242	560.122	514.849	545.927	562.809	528.127	593.424	583.139	524.989	459.796	530.082	539.139	519.891	521.033	574.779	530.597	560.544	579.3	588.067	623.858	576.17	505.571	580.724	541.521	653.564
band162	482.949	526.674	525.365	480.855	607.27	560.444	567.04	517.155	549.208	565.126	527.491	599.879	586.853	529.009	461.52	532.854	531.94	518.148	524.33	580.969	535.286	568.265	577.146	588.194	625.963	581.489	507.934	585.951	544.824	655.28
band163	483.575	528.178	526.832	477.688	603.518	566.121	570.085	517.196	554.323	562.831	531.958	599.333	589.041	530.11	461.587	529.717	541.666	524.616	528.532	583.84	537.143	565.765	588.504	586.715	625.293	583.059	511.215	588.736	547.289	657.352
band164	485.47	530.948	534.317	483.48	604.973	565.596	573.228	519.158	554.698	567.885	534.794	603.042	591.829	530.864	467.386	537.854	539.025	521.965	528.416	587.789	542.318	564.676	586.769	595.061	628.362	584.844	510.574	589.349	547.688	662.634
band165	486.004	534.178	532.22	484.066	608.664	570.162	572.127	523.504	562.719	571.721	539.588	604.539	594.107	534.64	467.879	536.597	543.763	528.402	531.95	586.442	544.773	570.588	593.762	597.921	632.195	587.696	515.776	592.253	549.756	664.221
band166	487.28	535.481	532.067	483.533	613.686	567.949	573.861	525.022	557.969	574.923	537.97	603.303	594.416	534.692	471.899	539.725	543.946	526.712	533.465	591.49	543.76	567.426	591.015	602.667	634.362	586.615	517.127	592.413	555.589	666.588
band167	487.912	536.385	541.615	482.994	612.872	573.374	574.158	525.034	564.615	574.749	535.552	604.4	593.106	537.619	469.54	542.24	548.64	530.624	535.079	589.932	545.617	570.338	595.015	597.424	637.415	592.97	519.941	595.07	551.214	665.764
band168	491.996	531.563	536.925	486.853	618.81	566.313	576.748	524.509	561.458	573.24	541.267	604.83	598.44	540.392	471.513	543.101	544.397	529.786	531.278	589.595	542.838	573.897	597.573	606.103	633.919	591.889	518.9	599.842	554.438	670.297
band169	489.82	537.43	537.8	485.997	612.009	563.909	575.722	528.334	559.094	573.388	535.867	612.964	595.56	540.453	470.15	541.144	547.47	535.952	533.556	593.252	549.136	572.647	597.862	607.588	637.317	593.444	520.651	595.535	554.591	666.136
band170	489.092	539.567	533.577	487.405	609.978	565.505	574.616	530.075	566.615	570.399	540.127	610.636	599.099	539.002	470.61	544.73	545.416	534.271	534.166	593.898	538.286	571.324	600.669	602.267	637.736	590.17	519.136	599.966	556.819	671.121
band171	489.978	540.719	539.565	488.278	616.735	567.253	578.861	531.27	562.115	577.76	541.776	609.564	600.604	544.759	471.072	543.788	551.271	539.847	536.06	596.065	547.942	570.353	596.038	600.085	641.207	598.496	522.156	599.504	560.911	671.223
band172	489.209	542.148	539.128	493.083	618.137	575.232	581.934	534.38	571.708	576.934	545.764	614.806	602.407	547.961	474.231	549.382	547.082	537.376	540.905	595.847	553.383	575.397	599.173	602.685	644.285	598.674	522.376	606.798	560.244	674.345
band173	492.53	541.874	539.658	492.359	622.903	575.01	580.8	535.48	564.708	577.678	545.479	614.194	604.468	546.619	475.706	552.929	553.319	536.367	537.846	604.653	550.825	571.882	607.092	601.17	646.955	598.341	527.041	608.966	564.002	674.372
band174	491.716	542.304	539.88	493.298	612.491	572.848	584.499	539.565	568.594	584.858	549.224	615.885	604.255	550.205	476.222	547.83	555.107	537.886	541.057	602.711	552.695	577.25	599.027	602.8	647.724	605.43	527.717	605.654	566.229	678.558
band175	491.652	546.989	538.93	495.134	623.42	580.697	587.184	537.462	578.333	579.432	547.558	622.776	605.748	550.838	475	549.339	552.073	540.773	540.547	603.844	548.026	569.324	604.165	609.958	647.715	605.637	529.624	606.14	567.499	676.05
band176	492.321	545.463	538.88	493.337	618.748	568.091	583.172	541.302	565.594	582.661	548.667	614.885	608.141	552.069	475.413	548.876	556.871	543.576	543.461	601.401	555.513	579.118	603.392	610.018	649.236	603.548	527.41	607.072	566.968	676.561
band177	487.818	541.126	538.803	493.692	620.372	573.727	588.689	537.346	577.427	580.831	544.897	623.77	605.833	551.506	473.628	553.019	552.42	541.188	539.95	602.405	552.377	574.176	601.581	604.558	644.195	597.681	529.454	610.178	567.596	672.517
band178	488.922	541.311	536.898	491.272	614.482	569.202	584.976	539.819	571.156	579.902	545.224	618.582	604.564	548.246	477.455	551.234	551.934	541.245	539.223	600.095	548.942	580.765	608.704	605.776	650.654	607.548	528.49	606.494	566.439	674.531
band179	489.237	547.815	540.195	492.762	618.469	573.848	586.473	541.173	572.26	580.852	546.479	616.224	605.911	550.272	474.159	549.717	553.082	539.284	542.774	601.759	555.487	577.279	606.608	611.927	647.931	600.481	528.12	606.326	565.838	675.562
band180	489.151	540.807	541.508	495.955	622	567.212	588.12	543.252	568.677	585.481	545.097	617.079	605.977	553.92	477.244	550.097	551.722	540.131	544.071	603.034	552.883	573.132	603.204	606.903	650.614	603.222	532.426	607.871	567.637	673.691
band181	489.892	550.496	542.795	496.064	622.283	575.848	593.534	545.056	570.906	582.383	549.024	617.527	608.135	552.584	478.146	549.296	556.41	543.017	543.009	604.099	555.584	576.441	605.108	608.2	656.329	611.015	526.807	610.119	567.373	677.264
band182	493.706	545.763	548.555	497.736	627.686	582.172	592.341	545.048	573.312	585.847	548.43	627.939	609.763	553.825	475.031	552.509	556.546	542.69	542.943	605.626	548.656	559.765	606.954	613.273	655.703	606.6	532.358	608.881	569.75	679.09
band183	489.573	546.867	542.44	497.306	619.181	578.758	591.913	545.738	570.458	585.885	543.685	622.236	609.073	554.293	477.975	549.781	553.757	545.952	543.092	602.898	549.896	572.176	605.888	609.03	655.024	609.489	532.771	610.687	571.038	678.39
band184	491.378	541.219	547.388	501.481	623.606	583.172	597.089	550.894	572.75	586.23	551.539	620.455	611.607	556.246	481.993	553.723	552.429	546.437	544.703	606.864	556.597	576.941	609.796	613.8	653.163	613.452	534.828	615.76	571.346	682.453
band185	496.339	547.693	546.242	496.489	617.075	577.929	598.588	550.763	570.333	587.798	548.2	620.582	609.806	558.994	482.731	555.968	561.073	543.371	546.159	606.354	557.078	577.147	610.492	616.382	654.459	613.815	535.912	616.682	573.051	683.656
band186	496.667	550.507	549.102	502.353	624.288	582.535	603.402	552.829	570.927	590.694	553.285	620.03	612.599	557.985	484.576	554.455	558.546	551.681	546.107	609.973	557.981	573.118	614.773	616.673	659.154	617.148	537.163	616	576.015	682.285
band187	497.877	546.748	551.59	502.083	628.155	583.455	602.026	551.351	574.969	590.404	548.424	626.236	613.187	557.631	481.251	558.734	561.811	549.668	549.13	611.5	556.552	585.338	616.45	615.788	662.26	619.726	538.132	615.137	573.738	682.365
band188	497.951	549.619	550.495	502.5	628.429	584.232	605.047	555.126	575.156	593.574	557.006	623.145	615.792	560.334	487.166	558.734	561.779	551.52	550.007	613.997	559.429	594.25	616.065	615.133	657.337	616.267	540.329	616.938	578.678	683.608
band189	499.64	547.715	554.06	507.473	630.748	583.879	610.176	557.866	582.771	597.426	558.655	621.364	617.896	565.416	488.464	560.367	565.713	555.249	548.506	610.609	565.006	599.397	618.004	616.152	662.37	619.667	540.619	617.917	580.686	685.482
band190	500.382	549.278	550.058	507.192	631.265	584.939	607.475	557.501	578.469	593.727	557.861	623.909	620.326	561.284	489.827	562.238	566.59	561.245	552.563	614.289	564.922	590.044	622.762	626.503	662.837	625.237	542.143	618.191	582.19	688.448
band191	506.18	564.915	554.605	509.084	630.142	581.263	607.059	558.734	586.688	598.738	566.521	631.345	622.078	565.552	490.599	561.762	566.527	562.057	554.009	619.429	566.519	595.941	623.704	627.194	668.411	626.104	545.24	621.178	584.81	690.893
band192	504.039	554.507	557.727	510.409	629.894	586.394	609.416	565.113	587.354	602.831	559.818	635.048	623.787	567.58	492.128	565.275	569.101	564.328	555.307	624.84	566.552	601.221	629.538	629.2	666.687	632.356	548.399	627.465	585.346	691.196
band193	509.37	561.385	562.188	514.587	638.327	587.434	610.113	565.796	583.542	606.142	566.891	629.909	627.372	567.584	498.668	567.021	574.495	565.293	558.713	622.602	566.351	603.221	630.115	635.836	667.496	631.8	542.512	628.791	585.638	693.692
band194	509.121	565.119	562.817	519.844	640.088	595.263	616.871	570.038	590.271	613.585	570.218	634.297	627.466	575.172	501.475	568.393	577.297	572.105	562.812	627.037	574.071	590.809	631.362	633.345	674.37	635.6	558.286	631.992	593.154	697.324
band195	513.274	567.315	563.895	523.595	646.124	598.384	619.198	575.264	591.26	611.066	575.921	636.018	635.557	576.472	503.159	576.204	583.603	573.031	565.263	630.412	578.032	597.721	636.477	639.709	676.48	642.437	554.526	638.106	598.904	698.468
band196	518.18	564.593	569.447	527.352	646.792	593.283	621.459	579.938	602.823	613.459	569.715	640.612	635.82	580.938	508.35	581.755	579.107	579.074	570.195	633.01	582.896	609.368	636.7	647.424	684.089	643.637	563.68	642.483	600.24	702.436
band197	522.258	575.093	571.37	531.969	651.518	598.889	627.904	583.901	603.458	618.306	578.624	650.188	639.648	585.496	510.509	581.343	588.243	587.515	570.836	640.898	584.513	605.044	647.55	649.248	688.821	652.504	564.592	643.868	605.728	708.666
band198	525.088	578.67	573.3	535.219	657.885	593.04	629.078	587.546	607.677	623.885	579.648	649.509	644.214	587.599	514.805	585.554	588.309	589.93	577.29	639.796	590.838	612.059	646.438	655.279	689.671	651.437	569.807	652.475	609.197	708.913
band199	528.384	577.844	575.602	535.494	651.146	603.505	631.216	589.198	609.448	624.913	586.206	653.745	647.344	594.897	519.639	589.337	594.738	597.948	583.332	642.211	597.26	614.515	652.685	659.879	690.463	652.252	568.973	651.214	614.566	712.437
band200	535.64	584.704	579.367	542.272	663.23	594.697	635.668	596.905	617.125	633.383	592.17	650.17	651.589	596.265	522.722	593.942	599.505	603.463	583.44	651.537	600.682	614.25	658.712	657.824	695.098	665.896	573.841	660.494	616.634	713.631
band201	536.718	587.911	589	550.505	676.288	616.778	638.715	604.06	615.594	635.989	596.115	659.679	656.442	601.119	527.083	602.182	603.615	607.074	585.66	653.388	605	623	665.588	664.352	695.561	674.519	578.626	661.504	624.34	718.191
band202	544.992	591.881	593.562	555.648	680.084	608.859	649.386	608.576	626.969	645.24	592.685	664.036	662.74	605.703	534.89	601.603	609.678	611.62	593.112	658.483	607.013	627.456	675.538	673.739	704.528	673.215	586.889	669.884	630.337	722.077
band203	553.301	600.085	600.168	566.103	685.124	619.071	653.075	617.303	637.135	648.29	603.382	666.43	669.283	611.037	547.63	610.753	614.363	622.004	596.461	665.929	620.286	639.574	677.654	677.691	708.878	684.593	594.728	680.584	636.397	731.388
band204	560.401	609.304	605.265	576.205	686.376	631.303	662.993	629.669	643.25	654.191	617.17	678.945	675.91	623.304	551.462	617.167	628.18	628.07	610.527	678.078	627.071	637.824	683.254	691.521	717.837	691.748	605.054	688.832	648.006	737.425
band205	569.16	616.841	616.48	584.378	702.08	634.121	672.376	637.123	652.448	670.77	620.667	683.867	685.602	626.983	560.843	626.401	634.363	640.707	618.986	685.18	635.396	650.735	701.369	699.842	724.081	700.252	611.122	695.512	654.344	746.873
band206	580.025	625.193	622.982	591.956	704.642	638.313	681.544	643.648	655.083	673.311	626.467	695.824	693.893	637.22	570.913	638.906	637.909	653.467	623.653	696.711	645.084	657.235	709.677	708.109	733.211	708.956	616.9	710.282	665.162	752.299
band207	593.476	636.778	634.903	603.886	716.845	648.646	685.835	654.421	665.99	688.678	631.818	698.267	701.748	644.444	579.327	640.914	645.754	665.498	635.216	704.466	649.669	669.765	715.196	719.406	736.39	722.778	628.587	717.791	675.955	761.49
band208	598.303	638.896	641.615	608.809	718.611	657.939	694.906	661.771	672.542	691.962	647.194	712.303	708.691	651.463	587.632	647.238	656.997	672.672	640.737	712.007	660.669	680.456	723.862	727.788	745.378	725.941	636.764	721.323	682.267	767.339
band209	605.438	642.007	649.73	618.57	726.624	658.768	703.911	669.558	680.521	697.743	644.479	714.194	716.7	658.621	596.052	656.762	662.927	686.201	647.917	715.636	667.162	689.206	733.473	733.709	745.341	734.23	639.274	730.382	690.944	775.612
band210	612.317	654.837	654.342	625.517	736.429	663.333	710.911	675.868	691.865	707.896	652.982	710.873	722.937	663.623	605.02	662.006	665.596	687.424	651.131	723.82	678.883	682.985	739.935	740.976	751.183	741.081	647.549	736.579	697.243	778.49
band211	625.853	656.674	661.525	634.109	743.115	666.616	713.739	683.409	695.917	708.383	659.782	718.376	726.041	671.078	614.545	668.886	677.959	690.166	658.805	732.816	680.519	695.456	746.985	751.491	760.142	746.689	652.864	743.863	706.267	786.426
band212	631.172	661.978	664.303	642.609	749.96	670.283	723.654	691.771	701.927	723.464	662.315	723.442	735.324	676.2	622.294	677.2	688.754	707.843	667.995	742.898	684.338	701.441	752.162	757.861	764.707	758.615	660.898	755.052	713.831	792.027
band213	637.387	667.033	678.59	652.856	750.819	685.909	732.769	699.074	707.792	733.055	679.242	737.006	742.83	689.515	631.827	685.099	694	713.022	675.601	753.701	696.052	715.176	761.362	767.091	771.699	763.407	670.544	765.072	722.249	798.454
band214	647.344	677.333	684.68	658.177	769.146	686.596	738.72	711.658	711.021	740.366	681.303	741.024	750.833	690.142	640.424	691.659	702.713	723.044	684.133	756.622	708.247	714.603	775.169	775.067	776.874	773.807	677.447	774.3	732.267	808.411
band215	660.849	682.67	696.03	668.819	774.177	703.747	751.334	718.647	731.156	752.393	688.436	754.139	762.45	703.147	648.437	701.517	710.681	734.987	691.468	769	722.909	737.029	781.919	782.394	786.333	787.193	683.769	788.067	745.108	816.633
band216	671.362	697.952	703.825	683.175	781.416	709.859	761.828	731.26	736.01	759.322	696.394	761.279	771.312	712.351	657.182	709.122	723.467	749.886	699.986	776.932	727.662	734.074	794.346	791.206	791.346	797.319	698.317	795.165	752.881	823.874
band217	678.628	703.915	710.712	687.181	791.956	716	766.087	736.446	743.125	761.934	706.515	770.691	774.511	721.769	671.453	719.054	733.338	753.987	713.699	786.636	740.013	739.074	804.315	807.83	805.472	809.022	703.052	801.68	762.465	829.056
band218	689.665	713.978	717.6	699.575	799.54	727.889	774.122	746.239	748.562	774.519	712.109	768.612	787.023	727.996	675.016	722.627	736.461	767.223	718.351	795.01	740.545	751.779	807.319	817.23	810.732	812.837	709.556	812.824	770.744	837.337
band219	696.468	713.359	724.403	707.381	812.177	728.131	781.856	754.092	757.688	782.268	715.897	776.527	793.023	736.752	687.249	730.281	745.959	775.646	728.041	804.357	752.987	755.662	819.504	823.424	811.398	819.341	713.569	820.672	780.311	841.429
band220	704.125	728.678	732.372	712.586	808.947	738.818	789.936	760.38	766.958	790.055	727.303	783.315	801.136	739.963	694.98	736.438	756.991	782.175	733.276	808.81	752.558	754.662	826.015	832.352	818.053	828.015	721.571	825.636	785.301	848.377
band221	712.986	727.041	737.285	721.73	816.398	739.263	792.546	767.873	771.635	792.492	733.4	783.933	807.803	747.062	702.886	744.264	761.937	791.642	742.87	818.439	767.175	772.471	832.158	834.485	822.02	836.459	729.805	835.005	790.495	852.311
band222	718.174	736.456	747.415	725.194	824.093	746.98	798.932	774.932	784.167	798.066	739.964	791.515	811.122	754.825	711.121	748.461	767.085	796	745.661	820.289	774.623	780.544	840.542	847.8	827.78	847.578	737.404	841.189	800.322	855.957
band223	725.133	731.344	751.008	735.528	824.991	749.505	805.339	781.577	785.885	810.77	739.6	794.921	821.628	760.756	715.834	754.906	775.167	805.856	751.497	828.602	778.266	775.809	845.031	847.315	832.715	852.496	740.12	843.824	806.198	862.364
band224	733.407	742.644	756.93	741.444	824.301	755.545	808.522	786.285	788.562	819.902	747.873	794.406	825.466	764.769	726.251	764.337	782.192	814.528	757.085	837.231	779.76	778.735	846.758	857.618	834.224	856.741	746.526	852.716	814.146	865.444
band225	742.695	748.878	762.092	747.403	832.619	761.848	813.358	793.271	798.542	819.404	749.618	803.958	830.335	773.315	724.637	768.818	787.164	821.629	764.149	844.265	793.675	786.662	858.312	861.739	843.232	863.459	749.059	859.829	821.12	870.86
band226	748.967	754.359	766.965	751.345	840.881	762.505	821.722	798.212	801.073	826.689	753.37	807.758	836.888	779.416	736.778	770.914	790.032	828.21	770.124	846.85	790.922	805.529	862.527	872.218	845.012	870.8	757.873	863.884	823.483	874.981
band227	750.824	755.141	770.585	758.727	849.801	765.293	825.042	803.351	817.083	829.546	765.818	823.109	841.722	786.539	744.939	776.32	798.136	833.624	777.04	852.741	800.584	800.721	868.427	872.364	852.459	880.333	764.082	869.171	830.051	879.215
band228	760.479	765.719	780.865	770.477	850.646	767.626	829.202	809.444	822.115	837.536	763.297	821.297	850.752	791.959	751.415	787.163	802.183	839.231	780.965	861.806	804.097	807.706	873.75	875.018	855.455	879.541	767.549	879.424	837.392	882.644
band229	762.722	764.152	780.212	773.237	853.177	781.253	831.242	814.559	820.552	845.415	767.83	814.976	853.746	794.627	752	791.129	808.022	845.904	780.53	860.949	803.929	805.544	873.535	878.952	851.959	879.926	768.093	888.941	842.278	885.782
band230	768.442	768.574	784.815	774.981	865.265	777.323	833.939	815.29	824.146	840.082	768.121	822.188	855.621	796.681	755.105	791.294	809.407	851.044	790.268	866.619	813.844	808.309	887.327	884.782	856.703	890.696	771.939	886.375	843.245	888.571
band231	771.047	769.278	790.835	777.375	859.35	780.626	835.188	822.657	818.823	844.191	774.036	831.103	855.093	800.931	762.217	795.541	815.845	850.039	794.086	871.884	820.214	803.382	882.262	890.527	858.297	899.815	776.029	890.811	850.889	889.801
band232	775.951	773.878	794.235	777.827	872.115	774.515	840.275	823.857	829.615	854.109	776	831.442	860.101	799.524	762.316	795.742	815.3	852.428	793.642	869.398	816.318	802.603	891.354	887.218	865.646	892.519	778.562	891.065	850.921	890.28
band233	773.857	772.559	794.725	782.756	866.46	783.152	838.289	825.286	825.917	845.47	775.733	827	860.112	802.052	764.702	796.249	819.145	857.437	792.851	871.864	814.779	821.294	882.892	890.212	862.317	897.215	775.723	891.548	850.999	889.036
band234	780.851	773.452	794.038	780.016	865.916	776.576	840.2	825.315	835.115	854.328	775.158	824.952	860.431	800.45	767.112	795.946	819.095	858.9	798.646	868.01	822.578	821.147	881.131	893.721	861.297	901.526	778.88	892.016	852.782	889.665
band235	775.967	776.519	790.895	780.494	871.509	782.535	840.268	826.567	829.688	855.814	777.745	826.073	858.343	800.541	771.639	798.989	820.035	859.707	796.465	868.724	815.169	820.279	890.919	889	854.894	896.578	776.807	891.649	852.831	889.671
band236	778.943	774.989	791.475	779.661	861.73	777.869	839.214	825.788	825.104	851.24	775.903	828.648	859.469	804.886	771.146	794.494	818.006	861.358	799.19	870.364	822.331	812.588	888.335	892.867	865.207	889.63	776.399	890.78	855.957	888.266
band237	783.953	773.948	797.997	785.431	865.398	775.889	839.906	824.443	834.698	855.623	776.394	822.915	860.387	802.677	769.823	798.215	818.631	861.258	795.074	872.745	820.89	822.618	888.881	883.897	858.634	893.519	778.435	891.349	853.954	882.753
band238	780.744	771.311	795.298	782.372	867.588	788.545	834.722	822.105	833.76	851.918	773.109	826.212	858.457	797.795	770.599	797.884	817.931	858.939	797.592	866.139	819.896	823.485	884.75	893.545	853.541	899.015	775.116	893.948	850.565	887.865
band239	781.262	768.541	797.505	781.792	869.832	781.232	838.932	825.262	824.635	852.71	773.618	826.552	859.135	800.905	775.392	794.822	814.284	856.978	799.214	868.633	823.435	816.103	886.396	893.618	857.093	896.963	780.975	894.881	850.808	882.442
band240	782.44	767.526	795.835	785.177	872.735	775.313	840.6	822.58	827.875	851.536	779.358	822.164	863.246	800.466	773.659	797.991	821.467	864.847	797.093	872.609	816.351	826.368	886.619	888.842	854.902	894.837	777.683	891.258	856.766	881.139
band241	787.049	766.985	794.447	787.678	867.743	777.273	841.889	823.738	828.469	849.301	772.842	819.824	858.277	804.802	776.883	796.957	819.177	860.092	799.04	873.384	820.753	813.706	890.823	890.655	853.126	897.748	776.542	891.488	852.034	883.714
band242	783.877	763.437	794.852	780.478	868.332	783.141	840.579	825.097	829.406	845.869	773.297	826.388	855.05	800.72	774.357	795.363	822.063	862.83	798.468	868.837	822.136	819.574	889.158	889.842	847.768	901.748	778.458	887.031	853.554	880.217
band243	783.742	766.796	796.315	782.039	864.412	781.798	839.652	826.731	831.406	845.508	772.37	817.455	857.098	802.103	774.148	796.318	819.435	867.397	795.955	863.714	820.494	818.691	886.612	887.273	859.057	897.807	775	889.788	856.564	878.124
band244	783.249	767.63	793.96	782.144	861.442	775.404	839.751	821.96	831.292	851.388	771.442	819.315	854.505	800.377	773.229	794.878	815.864	861.1	796.043	855.371	820.396	816.353	882.319	886.158	848.85	894.237	770.576	891.339	848.912	875.031
band245	781.571	760.726	787.495	776.755	853.885	775.394	834.028	818.808	819.76	846.372	771.206	810.588	851.128	798.767	774.002	786.109	813.915	856.838	792.349	859.966	812.162	800.221	880.231	882.218	843.837	889.6	766.485	881.594	847.098	870.538
band246	776.751	756.896	783.16	775.575	853.204	757.081	830.134	817.126	825.104	838.503	760.091	807.703	843.818	791.222	769.489	783.82	811.306	849.598	788.862	854.65	807.26	807.941	873.627	879.921	840.772	888.941	764.467	878.592	842.22	865.099
band247	772.157	756.626	782.617	773.075	850.044	768.394	827.344	815.258	820.198	834.027	762.503	801.642	837.933	787.248	767.404	783.26	807.044	847.646	785.287	852.136	803.221	800.941	874.977	880.339	837.524	886.83	760.923	876.786	836.713	860.253
band248	769.755	747.159	776.732	764.539	848.195	761.616	824.351	807.787	806.292	829.137	758.624	796.485	835.846	785.347	761.404	775.365	805.962	842.105	779.359	844.15	802.247	804.618	866.954	868.473	833.886	876.644	754.887	869.775	836.819	855.687
band249	764.742	743.859	777.25	765.773	836.898	766.091	818.838	805.299	811.312	827.077	750.57	787.933	832.485	780.558	758.491	773.118	798.006	837.908	780.054	835.248	797.448	793.015	860.485	862.776	828.472	876.556	754.925	866.69	830.101	850.31
band250	764.978	738.304	770.653	760.83	836.81	757.242	813.151	802.489	803.854	825.257	748.558	786.345	828.443	777.653	758.011	770.448	798.145	833.843	773.373	833.52	793.526	800.721	859.119	865.024	826.28	876.622	750.263	863.264	827.662	845.148
band251	760.495	728.711	765.158	755.041	825.668	739.626	810.652	801.323	797.26	822.574	744.061	783.091	822.349	772.515	749.668	766.002	791.328	835.41	771.333	830.354	794.188	790.382	852.915	860.303	821.293	861.111	748.029	857.92	822.392	838.26
band252	759.11	735.211	765.8	748.744	828.965	741.566	807.849	797.896	796.802	822.563	743.485	780.679	817.006	770.409	749.191	762.453	789.341	829.983	767.706	829.527	787.097	798.485	854.212	857.4	819.911	867.896	746.336	854.31	820.483	836.862
band253	757.223	730.263	752.643	753.711	826.243	735.121	797.981	795.98	793.24	815.47	740.739	779.976	816.974	771.616	746.843	760.491	788.849	829.419	768.579	828.946	789.818	784.912	845.454	851.061	814.232	862.926	742.615	851.411	818.979	833.93
band254	754.483	726.811	759.508	756.9	825.885	732.778	798.944	794.911	788.979	816.432	733.909	778.673	815.171	771.537	748.711	760.034	787.732	824.432	768.686	828.207	786.968	783.838	849.062	851.97	812.711	859.133	743.519	850.377	817.698	830.723
band255	753.511	729.733	758.492	750.028	820.341	731.242	803.087	793.443	792.01	804.235	740.521	771.648	811.067	766.912	746.253	756.056	786.243	823.258	758.427	823.878	787.214	770.485	846.881	850.152	810.354	862.807	736.853	846.375	812.61	826.23
band256	747.421	726.596	752.128	747.248	822.522	734.949	797.965	788.078	791.875	807.191	734.091	771.139	810.28	763.028	743.861	753.485	784.035	822.009	757.098	820.575	777.474	770.044	841.573	836.685	806.894	852.919	739.222	847.884	810.81	822.614
band257	747.99	718.785	747.207	746.061	815.881	724.97	790.856	786.215	779.208	803.131	731.255	763.764	807.19	759.14	744.612	751.468	773.814	816.271	757.547	820.888	772.987	766.132	836.758	836.152	803.041	848.504	730.889	844.124	809.279	819.5
band258	743.736	719.396	742.112	739.731	816.956	723.475	787.271	782.003	783.427	798.257	727.164	761.364	802.076	753.438	735.538	750.562	772.003	813.376	752.75	810.548	766.292	764.118	834.454	833.588	801.207	838.615	727.946	838.437	802.065	812.874
band259	738.742	715.211	737.115	735.759	794.27	718.606	783.776	776.576	782.031	795.721	727.909	754.067	797.674	756.506	732.666	743.798	770.694	802.721	748.684	807.395	764.097	767.618	829.212	829.818	793.057	841.526	728.964	834.16	800.333	804.893
band260	729.785	712.952	735.2	729.894	793.788	713.707	779.014	772.803	776.708	787.301	720.2	755.576	791.043	747.899	724.946	738.35	766.325	803.537	741.411	807.194	753.584	764.162	821.877	824.424	783.683	839.289	717.603	826.408	793.601	803.155
band261	729.348	704.17	730.133	729.833	787.912	708.596	774.212	768.894	760.708	787.694	720.909	745.503	786.217	745.069	721.386	734.348	758.423	795.306	735.183	799.469	754.214	744.882	817.946	816.079	785.801	826.637	717.984	816.765	790.625	795.712
band262	723.767	700.189	725.982	723.212	789.115	709.889	769.101	765.837	754.302	777.667	714.697	749.358	782.084	739.235	721.168	730.996	757.959	795.69	734.582	792.728	749.312	741.882	813.792	811.012	788.122	823.326	708.898	811.183	787.792	790.892
band263	720.536	690.489	719.405	718.462	778.327	702.475	764.068	760.074	761.167	773.137	709.03	737.576	779.573	734.069	716.924	721.73	753.044	788.659	728.907	788.337	745.013	743.265	805.138	810.036	776.366	821.059	706.546	811.605	781.589	782.88
band264	711.321	688.452	719.62	713.231	781.186	696.253	756.656	754.681	748.865	767.907	700.006	736.745	773.806	731.498	707.531	720.833	748.161	778.904	722.845	782.85	741.74	744.338	800.508	797.958	767.439	807.289	703.893	805.432	776.575	778.608
band265	711.07	687.981	711.72	709.464	773.274	688.949	756.614	746.683	740.49	764.596	702.752	731.321	767.422	728.338	707.776	715.648	742.726	773.175	720.95	778.357	736.455	725.529	794.362	797.091	761.528	809.874	700.327	802.152	772.113	771.63
band266	707.131	681.452	707.78	703.605	771.912	686.333	754.689	745.57	739.688	761.432	695.921	726.794	764.118	722.931	703.022	712.363	740.691	778.157	718.592	773.33	731.104	724.118	788.477	791.745	763.085	804.548	695.737	796.199	767.462	768.691
band267	703.685	681.919	708.12	703.922	762.575	679.96	751.546	743.501	740.99	756.12	695.982	717.176	760.742	717.425	693.821	709.034	739.114	769.703	711.42	774.248	720.688	728.206	786.562	784.788	753.695	796.763	692.569	794.16	762.012	766.236
band268	701.836	679.752	704.52	698.931	771.947	683.616	749.569	738.598	740.927	755.738	689.164	715.818	755.11	715.196	698.747	703.644	735.562	767.755	708.014	766.759	718.519	714.294	788.431	783.83	750.065	791.156	688.009	789.866	758.794	761.093
band269	697.681	679.959	699.74	697.919	758.075	676.141	742.965	739.338	738.479	751.153	683.43	716.77	752.072	717.099	697.877	702.976	723.64	763.921	708.01	765.044	719.104	726.588	776.177	778.709	755.793	790.711	684.993	782.693	756.228	759.124
band270	693.08	674.481	694.965	692.244	758.009	678.96	737.344	731.123	725.26	747.863	685.473	709.733	751.188	708.192	688.43	700.333	724.508	761.603	704.741	762.143	710.961	728.456	777.519	772.442	752.76	787.822	679.726	783.186	754.587	754.917
band271	687.54	665.059	690.362	692.031	751.938	671.111	727.972	726.346	720.49	742.317	681.036	700.073	742.365	706.116	687.244	689.91	727.413	753.563	697.9	754.599	713.175	717.529	770.362	774.794	741.22	784.689	679.995	774.003	747.231	749.201
band272	685.955	659.193	688.865	684.109	739.673	661.667	727.821	720.048	718.083	739.913	676.37	695.576	737.509	701.873	683.365	687.884	717.3	749.576	694.639	744.241	709.422	719.75	764.254	769.915	729.817	778.119	673.669	767.581	741.523	744.959
band273	678.135	658.07	683.408	677.714	735.929	658.838	721.758	716.679	712.677	736.454	670.018	698.909	731.654	691.769	677.155	682.077	707.032	745.607	690.427	739.105	705.805	707.206	758.446	759.921	728.959	772.459	666.415	764.406	731.618	738.383
band274	675.575	653.004	680.972	674.798	731.562	656.677	715.831	711.759	713.885	724.623	664.521	684.133	729.292	690.978	671.056	679.948	707.492	735.926	681.848	733.119	693.123	697.265	750.965	758.697	725.146	765.059	662.154	760.522	730.255	734.783
band275	668.045	647.544	671.465	670.091	725.058	655.03	714.953	704.408	704.583	718.639	656.855	681.982	718.012	682.61	665.108	670.489	695.546	730.288	677.057	732.303	687.565	692.412	744.765	748.436	717.407	759.904	657.571	750.096	725.325	728.244
band276	658.213	637.011	666.46	662.569	717.863	651.354	707.28	695.614	696.417	715.279	646.945	674.618	715.005	676.634	659.509	667.176	693.088	722.362	669.649	723.694	683.435	688.147	737.885	746.733	706.252	753.185	652.011	744.814	719.363	722.527
band277	654.961	632.244	663.57	657.63	715.783	640.273	702.358	691.661	686.438	706.59	648.794	676.127	708.589	671.64	659.442	659.082	686.801	719.079	669.259	717.942	675.487	685.897	731.785	740.273	702.512	749.57	646.714	738.804	710.435	717.58
band278	651.045	627.007	657.732	652.253	705.195	636.283	697.965	685.349	684.135	698.175	643.582	665.479	703.829	664.808	652.935	655.077	682.508	716.293	661.295	711.442	676.597	675.618	731.154	736.818	697.813	744.778	637.773	736.447	705.818	710.972
band279	649.243	626.341	655.67	648.43	704.35	641.434	690.6	681.781	682.01	696.645	638.745	666.109	696.858	662.06	647.52	655.15	676.53	709.039	654.922	707.31	667.331	673.206	724.681	733.418	695.634	734.985	634.757	731.465	699.012	707.372
band280	641.593	625.911	652.658	641.086	700.704	629.384	687.179	675.775	675.688	688.115	629.509	662.2	695.17	657.894	643.374	645.695	674.18	704.279	654.731	702.293	669.552	662.985	722.273	726.261	694.228	739.504	633.909	720.708	695.233	702.74
band281	644.276	616.848	644.135	639.112	696.496	630.505	686.047	673.073	677.979	682.918	633.952	657.945	691.758	654.216	642.312	644.594	665.413	701.624	648.592	697.34	663.779	663.088	717.404	719.261	683.008	730.207	627.873	718.568	692.927	700.193
band282	636.256	610.815	644.768	635.809	695.248	618.737	681.991	666.299	668.406	682.978	627.364	656.879	687.977	653.879	643.007	641.406	667.287	699.424	645.876	693.857	658.597	668.103	712.562	712.624	679.472	723.815	624.279	715.863	687.988	696.168
band283	634.309	617.178	635.347	632.772	683.376	624.636	676.854	664.604	667.083	677.781	625.182	645.333	682.121	645.151	637.442	635.925	662.656	695.913	643.615	689.33	656.201	660.5	707.654	715.515	679.939	725.096	626.834	711.336	685.016	692.751
band284	633.029	608.322	633.055	630.048	688.885	618.061	677.671	658.409	660.771	672.574	621.491	647.036	678.005	647.875	631.233	634.069	655.584	691.869	641.297	687.707	653.084	647.721	702.769	708.133	669.801	715.237	620.68	705.545	682.17	687.46
band285	629.481	596.63	633.612	620.333	677.372	618.657	674.393	654.642	661.146	674.929	613.521	638.467	671.861	636.127	625.128	628.148	648	686.703	637.282	686.429	646.721	664.838	697.031	706.115	664.972	713.252	623.737	697.827	677.998	683.864
band286	621.843	598.341	630.86	617.362	670.673	606.04	661.268	651.73	645.865	663.607	607.873	634.873	668.576	633.905	620.807	622.577	646.088	679.533	630.817	675.078	633.026	644.691	696.485	696.648	658.817	703.889	622.866	693.357	670.631	677.566
band287	615.73	589.141	618.072	612.325	671.522	600.697	657.685	644.808	650.312	662.071	599.782	627.352	663.092	629.017	618.094	616.646	638.521	676.983	621.596	668.629	632.37	641.485	689.258	694.406	661.11	694.726	623.531	684.804	666.095	670.816
band288	604.71	580.922	617.095	603.138	665.155	596.313	658.052	639.168	632.5	649.038	598.77	623.188	653.161	620.05	608.365	611.245	632.306	671.598	616.285	662.211	625.552	631.25	676.977	676.818	660.988	688.193	625.481	678.463	656.226	662.703
band289	604.049	585.593	611.87	595.392	655.279	593.586	652.122	640.292	631.073	643.005	589.788	616.127	644.508	612.853	605.022	604.498	629.123	661.642	611.713	655.17	623.481	640.985	669.381	675.491	657.557	682.096	628.435	673.917	648.527	657.666
band290	597.609	579.737	608.008	592.534	649.934	580.939	654.868	641.589	621.625	640.475	582.939	611.224	640.058	608.457	597.397	596.676	618.609	649.52	606.834	648.741	617.604	626.132	666.288	669.309	657.093	678.956	628.29	664.398	642.713	650.856
band291	591.513	578.63	609.033	588.266	641.735	594.576	656.155	638.526	623.688	634.929	581.23	602.327	636.109	606.075	591.693	596.33	620.562	647.253	597.204	646.854	610.182	631.044	658.965	667.752	660.26	672.681	627.746	661.08	640.767	645.805
band292	588.088	576.556	612.02	586.036	640.677	595.879	656.494	640.044	610.479	629.415	584.461	601.982	632.68	600.888	589.578	590.176	614.297	640.769	595.181	641.167	606.584	625.412	648.458	661.848	664.293	668.978	627.512	656.863	635.486	642.271
band293	585.274	574.533	612.442	580.78	638.168	599.273	654.955	639.181	608.229	626.645	571.697	594.703	628.147	601.659	590.614	584.418	612.388	641.472	590.221	641.245	602.091	642.853	653.973	663.897	657.646	664.859	628.982	653.561	634.91	640.914
band294	579.078	576.356	614.913	579.95	634.261	588.354	659.68	643.476	607.385	619.776	574.758	594.982	626.621	597.075	586.276	583.461	611.792	634.511	588.905	636.735	599.974	634.735	644.912	657.242	662.309	662.385	629.145	649.716	631.285	641.14
[truncated: 148 more rows]

## Sheet: 48h
band	1	2	3	4	5	6	7	9	10	8	11	12	13	14	15	16	17	18	19	20	21	22	23	24	25	26	27	28	29	30
[truncated: 442 more rows]

## Sheet: 60h
band	1	2	3	4	5	6	7	8	9	10	11	12	13	14	15	16	17	18	19	20	21	22	23	24	25	26	27	28	29	30
[truncated: 442 more rows]

## Sheet: 72h
band	1	2	3	4	5	6	7	8	9	10	11	12	13	14	15	16	17	18	19	20	21	22	23	24	25	26	27	28	29	30
[truncated: 442 more rows]
